# Supplementary material for: Functional genomics identifies a small secreted protein that plays a role during the biotrophic to necrotrophic shift in the root rot pathogen Phytophthora medicaginis
Source: Front Plant Sci. 2024 Aug 19;15:1439020. doi: 10.3389/fpls.2024.1439020 (PMC11366588; doi:10.3389/fpls.2024.1439020)
Supplement: Supplementary file 10 [file Table10.xlsx]

## Sheet: Sheet1
Supplementary Table 11. Significantly differentially regulated chickpea genes in Phytmed_10271 knockdown (p < 0.05, -1 > Log2FC > 1)
gene_id	cicer gene number	Log2Foldchange_pm10271vscontrol	padj_pm10271vscontrol	predicted_coregulatory_gene	true_corregulatory_genes	MicE	SpearmanRho	start	end	strand	Note	PANTHER.Annotation	InterPro.Annotation	PFAM.Annotation	GO.Annotation	ProSite.Annotation	SUPERFAMILY.Annotation	Gene.Description	RefSeq.ID	GOSlim.Term	NCBI.Conserve.Domain	TF.Family	RGene.Family
Ca_21503	Ca_21503.1|Ca_LG_7:38592239-38598662|minus|	5.4248	3.3e-08	yes	yes	0.811278	-0.327416	38592239	38598662	-	4-coumarate:CoA ligase 2	PTHR24096 PTHR24096	IPR000873 IPR020845 IPR025110	PF00501 PF13193	GO:0003824 GO:0008152	PS00455	SSF56801	Probable_4-coumarate--CoA_ligase_1	XM_004507784.1	#has_catalytic_activity|#involved_in_metabolic_process|#located_in_nucleus	PLN02246-PLN02246|cd05904-4CL|cl17068-AFD_class_I	--	--
Ca_00674	Ca_00674.1|Ca_LG_1:7393642-7393988|plus|	-2.81174	1.42e-06	yes	yes	0.954434	0.823529	7393642	7393988	+	Calcium-binding EF-hand family protein	PTHR10891 PTHR10891	IPR002048 IPR011992 IPR018247	PF13833	GO:0005509	PS00018 PS50222	SSF47473	Calcium-binding_protein_PBP1	XM_004487297.1	#has_calcium_ion_binding|#located_in_nucleus	cl08302-EFh	--	--
Ca_14858	Ca_14858.1|Ca_LG_5:42169575-42172149|plus|	5.09192	1.85e-06	yes	yes	0.811278	-0.348084	42169575	42172149	+	subtilisin-like serine protease 2	PTHR10795 PTHR10795	IPR000209 IPR003137 IPR010259 IPR015500 IPR023828	PF00082 PF02225 PF05922	GO:0004252 GO:0006508 GO:0042802 GO:0043086	PS00138	SSF52025 SSF52743	Subtilisin-like_protease	XM_004501475.1	#has_identical_protein_binding|#has_serine-type_endopeptidase_activity|#involved_in_negative_regulation_of_catalytic_activity|#involved_in_proteolysis|#located_in_extracellular_region|#located_in_membrane	COG1404-AprE|cd02120-PA_subtilisin_like|cd04852-Peptidases_S8_3|cl05470-Inhibitor_I9|cl10459-Peptidases_S8_S53	--	--
Ca_03651	Ca_03651.1|Ca_LG_2:9600990-9602154|minus|	-2.52885	5.27e-06	yes	yes	0.82782	0.676471	9600990	9602154	-	elicitor-responsive protein 1-like [Glycine max]	PTHR10024 PTHR10024	IPR000008 IPR012600	PF00168 PF08126	GO:0004197 GO:0005515	PS50004	SSF49562	Elicitor-responsive_protein_1_	XM_004490837.1	--	cl14603-C2	--	--
Ca_11153	Ca_11153.1|Ca_LG_4:40359595-40360756|minus|		6.59e-05	yes	yes	0.954434	0.311765	40359595	40360756	-	Protein phosphatase 2C family protein	PTHR13832 PTHR13832	IPR001932 IPR015655	PF00481	GO:0003824		SSF81606	Probable_protein_phosphatase_2C_6	XM_004497366.1	#has_catalytic_activity|#has_protein_modification_of_type_N-terminal_protein_myristoylation|#located_in_plasma_membrane	cd00143-PP2Cc|cl00120-PP2Cc	--	--
Ca_05277	Ca_05277.1|Ca_LG_3:3315091-3317061|plus|	-3.22631	0.000125694	yes	yes	0.954434	0.273529	3315091	3317061	+	Uncharacterised protein family (UPF0497)		IPR006702	PF04535				CASP-like_protein_ARALYDRAFT_321547	XM_004492461.1	#located_in_nucleus|#located_in_plasma_membrane	cl04571-MARVEL	--	--
Ca_04418	Ca_04418.1|Ca_LG_2:24620118-24621563|minus|	-2.6072	0.000138305	yes	yes	0.954434	0.805882	24620118	24621563	-	Disease resistance protein (TIR-NBS-LRR class) family	PTHR11017 PTHR11017	IPR000157	PF01582	GO:0005515 GO:0007165 GO:0006952	PS50104	SSF52200	TMV_resistance_protein_N	XM_004489904.1	#involved_in_signal_transduction|#located_in_cytoplasm|#located_in_intracellular	cl22440-TIR_2|smart00255-TIR	--	TIR
Ca_15558	Ca_15558.1|Ca_LG_6:4390561-4394449|plus|	2.66658	0.000177635	yes	yes	0.811278	-0.311765	4390561	4394449	+	aldehyde dehydrogenase family 2 member C4-like [Glycine max]	PTHR11699 PTHR11699	IPR015590 IPR016160 IPR016161 IPR016162 IPR016163	PF00171	GO:0008152 GO:0016491 GO:0016620 GO:0055114	PS00070 PS00687	SSF53720	Aldehyde_dehydrogenase_family_2_member_B7,_mitochondrial	XR_189940.1	#has_oxidoreductase_activity|#involved_in_metabolic_process|#involved_in_oxidation-reduction_process|#located_in_chloroplast	cl11961-ALDH-SF	--	--
Ca_10976	Ca_10976.1|Ca_LG_4:37242466-37247498|minus|	2.70735	0.000568766	yes	yes	0.988699	-0.297277	37242466	37247498	-	N-acyl-L-amino-acid amidohydrolase	PTHR11014 PTHR11014	IPR001261 IPR002933 IPR010159 IPR011650	PF01546 PF07687	GO:0004046 GO:0005737 GO:0006508 GO:0006520 GO:0008152 GO:0008237 GO:0016787	PS00758 PS00759	SSF53187 SSF55031	Aminoacylase-1	XM_004498043.1	#has_aminoacylase_activity|#has_hydrolase_activity|#has_metallopeptidase_activity|#involved_in_cellular_amino_acid_metabolic_process|#involved_in_metabolic_process|#involved_in_proteolysis|#located_in_Golgi_apparatus|#located_in_cytoplasm|#located_in_vacuole	TIGR01880-Ac-peptdase-euk|cd05646-M20_AcylaseI_like|cl14876-Zinc_peptidase_like	--	--
Ca_21318	Ca_21318.1|Ca_LG_7:36755457-36756782|plus|	7.55044	0.00062367	yes	yes	0.811278	-0.32149	36755457	36756782	+	TCP family transcription factor	PTHR31072 PTHR31072	IPR005333 IPR017887	PF03634		PS51369		Transcription_factor_TCP14	XM_004508694.1	#located_in_nucleus	cl15990-TCP	TCP	--
Ca_24567	Ca_24567.1|scaffold01661:33685-34151|minus|	-3.022	0.00062367	yes	yes	0.954434	0.288235	33685	34151	-	seed maturation protein [Glycine max]		IPR005513	PF03760	GO:0009790			--	XM_004508968.1	#involved_in_embryo_development|#located_in_plasmodesma	cl04248-LEA_1	--	--
Ca_15869	Ca_15869.1|Ca_LG_6:7656226-7658839|plus|	7.45884	0.000646248	yes	yes	0.811278	-0.312601	7656226	7658839	+	Protein kinase superfamily protein	PTHR24056 PTHR24056	IPR000719 IPR002290 IPR008271 IPR011009 IPR017441	PF00069	GO:0004672 GO:0004674 GO:0005524 GO:0006468 GO:0016772	PS00107 PS00108 PS50011	SSF56112	Probable_serine/threonine-protein_kinase_At1g54610	XM_004503726.1	#has_ATP_binding|#has_protein_kinase_activity|#has_protein_serine/threonine_kinase_activity|#has_transferase_activity,_transferring_phosphorus-containing_groups|#involved_in_protein_phosphorylation|#located_in_plasma_membrane	cd07840-STKc_CDK9_like|cl21453-PKc_like|smart00220-S_TKc	--	--
Ca_03032	Ca_03032.1|Ca_LG_2:2101627-2105591|minus|	-2.21434	0.000858135	yes	yes	0.816519	0.885294	2101627	2105591	-	Disease resistance protein (TIR-NBS-LRR class) family	PTHR11017 PTHR11017	IPR000157 IPR000767 IPR002182 IPR005636 IPR027417	PF00931 PF01582 PF03942	GO:0005515 GO:0006952 GO:0007165 GO:0043531	PS50104	SSF52200 SSF52540	TMV_resistance_protein_N_	XM_004516994.1	--	cl01221-DTW|cl21455-ABC_ATPase|cl22462-TIR	--	TIR-NBS
Ca_09187	Ca_09187.1|Ca_LG_4:14457840-14461841|minus|	5.181	0.00107934	yes	yes	0.988699	-0.324485	14457840	14461841	-	transcription factor UNE12 [Glycine max]	PTHR16223 PTHR16223	IPR011598	PF00010	GO:0046983	PS50888	SSF47459	Transcription_factor_UNE12	XM_004495091.1	#located_in_nucleus	--	bHLH	--
Ca_04930	Ca_04930.1|Ca_LG_2:31368606-31370265|minus|	-2.77521	0.00110778	yes	yes	0.954434	0.288235	31368606	31370265	-	U-box domain-containing protein 4-like [Glycine max]	PTHR23315	IPR000225 IPR011989 IPR016024	PF00514	GO:0005488 GO:0005515	PS50176	SSF48371	U-box_domain-containing_protein_4	XM_004489179.1	#has_kinesin_binding|#located_in_kinesin_complex	cd00020-ARM|cl22454-ARM	--	--
Ca_13819	Ca_13819.1|Ca_LG_5:31673739-31676534|plus|	2.79832	0.00141515	yes	yes	0.811278	-0.302941	31673739	31676534	+	NAD(P)-binding Rossmann-fold superfamily protein	PTHR24316 PTHR24316	IPR002198 IPR002347 IPR016040	PF00106	GO:0008152 GO:0016491		SSF51735	Very-long-chain_3-oxoacyl-CoA_reductase_1	XM_004502292.1	#has_nucleotide_binding|#has_oxidoreductase_activity|#involved_in_metabolic_process|#located_in_chloroplast|#located_in_membrane	PLN02780-PLN02780|cd05356-17beta-HSD1_like_SDR_c|cl21454-SDR	--	--
Ca_09534	Ca_09534.1|Ca_LG_4:19127072-19128955|plus|	-2.65042	0.00153619	yes	yes	0.896038	0.8	19127072	19128955	+	exocyst subunit exo70 family protein E2	PTHR12542 PTHR12542	IPR004140 IPR016159	PF03081	GO:0000145 GO:0006887		SSF74788	Exocyst_complex_component_EXO70B1	XM_003598949.1	#involved_in_exocytosis|#located_in_exocyst|#located_in_nucleus	cl03878-Exo70	--	--
Ca_15602	Ca_15602.1|Ca_LG_6:4800425-4805094|plus|	4.45857	0.00167095	yes	yes	0.988699	-0.233039	4800425	4805094	+	ATP-binding/protein serine/threonine kinase [Glycine max]	PTHR24420	IPR000719 IPR002290 IPR008271 IPR011009 IPR013210 IPR013320 IPR017441 IPR025875	PF00069 PF08263 PF12799	GO:0004672 GO:0004674	PS00107 PS00108 PS50011	SSF52058 SSF56112	Probable_LRR_receptor-like_serine/threonine-protein_kinase_At5g10290	XM_004503824.1	#has_ATP_binding|#has_protein_kinase_activity|#has_protein_serine/threonine_kinase_activity|#has_protein_tyrosine_kinase_activity|#has_transferase_activity,_transferring_phosphorus-containing_groups|#involved_in_protein_phosphorylation|#located_in_plasma_membrane	cl21453-PKc_like|smart00219-TyrKc	--	--
Ca_07696	Ca_07696.1|Ca_LG_3:39113915-39115449|minus|	7.54151	0.00170509	yes	no	0.816519	0.632674	39113915	39115449	-	NAC domain protein	PTHR31719 PTHR31719	IPR003441	PF02365	GO:0003677 GO:0006355	PS51005	SSF10194	NAC_transcription_factor_29	XM_004493904.1	#has_DNA_binding|#involved_in_regulation_of_transcription,_DNA-dependent|#located_in_nucleus	cl03558-NAM	NAC	--
Ca_00031	Ca_00031.1|Ca_LG_1:573781-574745|minus|	-3.54864	0.00208557	yes	yes	0.954434	0.326471	573781	574745	-	probable calcium-binding protein CML18-like [Glycine max]	PTHR10891 PTHR10891	IPR002048 IPR011992 IPR018247	PF13499	GO:0005509	PS00018 PS50222	SSF47473	Probable_calcium-binding_protein_CML27	XM_004490750.1	#has_calcium_ion_binding|#located_in_plasma_membrane|#located_in_vacuole	cd00051-EFh|cl08302-EFh	--	--
Ca_11607	Ca_11607.1|Ca_LG_4:50057990-50058388|minus|	-2.21145	0.00212715	yes	yes	0.954434	0.3	50057990	50058388	-	uncharacterized protein LOC102668708 isoform X2 [Glycine max]							--	XM_004504458.1	--	--	--	--
Ca_19071	Ca_19071.1|Ca_LG_7:1099374-1101526|plus|	-3.42748	0.0021447	yes	yes	0.954434	0.341176	1099374	1101526	+	CASP-like protein 7 [Glycine max]	PTHR11615 PTHR11615	IPR006459 IPR006702	PF04535				CASP-like_protein_7	XM_004508253.1	#located_in_Golgi_apparatus	cl04571-MARVEL	--	--
Ca_20816	Ca_20816.1|Ca_LG_7:30994261-30997223|plus|	3.31277	0.00223885	yes	yes	0.811278	-0.335294	30994261	30997223	+	subtilisin-like serine protease 2	PTHR10795 PTHR10795	IPR000209 IPR003137 IPR010259 IPR015500 IPR023828	PF00082 PF02225 PF05922	GO:0004252 GO:0006508 GO:0042802 GO:0043086	PS00138	SSF52743	Subtilisin-like_protease	XM_004509028.1	#has_identical_protein_binding|#has_serine-type_endopeptidase_activity|#involved_in_negative_regulation_of_catalytic_activity|#involved_in_proteolysis|#located_in_extracellular_region|#located_in_membrane	COG1404-AprE|cd02120-PA_subtilisin_like|cd04852-Peptidases_S8_3|cl05470-Inhibitor_I9|cl10459-Peptidases_S8_S53	--	--
Ca_00226	Ca_00226.1|Ca_LG_1:2462019-2465761|plus|	2.28396	0.00248138	yes	yes	0.988699	-0.179942	2462019	2465761	+	Auxin-responsive protein n=2 Tax=Solanum RepID=G9HPX0_SOLLC	PTHR31734 PTHR31734	IPR003311 IPR011525	PF02309	GO:0005634 GO:0006355 GO:0046983 GO:0009733 GO:0009725	PS50962	SSF54277	Auxin-responsive_protein_IAA26	XM_004486731.1	#has_protein_dimerization_activity|#involved_in_regulation_of_transcription,_DNA-dependent|#located_in_nucleus	cl03528-AUX_IAA	--	--
Ca_04446	Ca_04446.1|Ca_LG_2:25087227-25089050|plus|	-4.44486	0.00310819	yes	no	0.816519	-0.247414	25087227	25089050	+	Ribonuclease T2 family protein	PTHR11240	IPR001568 IPR018188	PF00445	GO:0003723 GO:0033897	PS00530 PS00531	SSF55895	Ribonuclease_3	XM_004490011.1	#has_RNA_binding|#has_protein_modification_of_type_N-terminal_protein_myristoylation|#has_ribonuclease_T2_activity|#located_in_extracellular_region	cd01061-RNase_T2_euk|cl00208-RNase_T2	--	--
Ca_17104	Ca_17104.1|Ca_LG_6:22124595-22126345|plus|	-3.41035	0.00317768	yes	yes	0.954434	0.244118	22124595	22126345	+	Thioredoxin superfamily protein	PTHR10438	IPR005746 IPR012336 IPR013766	PF00085	GO:0006662 GO:0015035 GO:0045454	PS51352	SSF52833	Thioredoxin-like_protein_CXXS1	XM_004505373.1	#has_electron_carrier_activity|#has_protein_disulfide_oxidoreductase_activity|#involved_in_cell_redox_homeostasis|#involved_in_glycerol_ether_metabolic_process|#located_in_cytoplasm	cd02947-TRX_family|cl00388-Thioredoxin_like	--	--
Ca_21801	Ca_21801.1|Ca_LG_7:41552677-41553919|minus|	-2.89561	0.00320168	yes	yes	0.954434	0.329412	41552677	41553919	-	tonoplast dicarboxylate transporter	PTHR10283 PTHR10283	IPR001898	PF00939	GO:0005215 GO:0006814 GO:0016020 GO:0055085			Tonoplast_dicarboxylate_transporter	XM_004517227.1	#has_transporter_activity|#involved_in_sodium_ion_transport|#involved_in_transmembrane_transport|#located_in_membrane	COG0471-CitT|cl21473-ArsB_NhaD_permease	--	--
Ca_10121	Ca_10121.1|Ca_LG_4:26177307-26181450|minus|	2.45485	0.00327346	yes	yes	0.988699	-0.270588	26177307	26181450	-	sucrose transporter 4	PTHR19432 PTHR19432	IPR005828 IPR005989 IPR016196	PF00083	GO:0005887 GO:0008515 GO:0015770 GO:0016021 GO:0022857 GO:0055085		SSF10347	Putative_sucrose_transport_protein_SUC6	XM_004496325.1	#has_sucrose_transmembrane_transporter_activity|#has_transmembrane_transporter_activity|#involved_in_sucrose_transport|#involved_in_transmembrane_transport|#located_in_integral_to_membrane|#located_in_integral_to_plasma_membrane|#located_in_plasma_membrane	TIGR01301-sucrose_transporter-like_protein	--	--
Ca_23588	Ca_23588.1|Ca_LG_8:17258391-17260793|minus|	2.24506	0.00392549	yes	yes	0.988699	-0.223694	17258391	17260793	-	hypothetical protein							--	XM_003612852.1	--	--	--	--
Ca_11816	Ca_11816.1|Ca_LG_4:53855308-53856132|plus|	-2.44791	0.00459995	yes	yes	0.954434	0.334069	53855308	53856132	+	unknown protein							--	XM_004497024.1	#located_in_nucleus	--	--	--
Ca_15807	Ca_15807.1|Ca_LG_6:6963250-6965942|minus|	-2.08166	0.00520618	yes	yes	0.954434	0.247059	6963250	6965942	-	Protein kinase superfamily protein	PTHR13902 PTHR13902	IPR000719 IPR002290 IPR008271 IPR011009	PF00069	GO:0004672 GO:0004674 GO:0005524 GO:0006468 GO:0016772	PS00108 PS50011	SSF56112	Probable_serine/threonine-protein_kinase_WNK7	XM_007159755.1	#has_ATP_binding|#has_protein_kinase_activity|#has_protein_serine/threonine_kinase_activity|#has_transferase_activity,_transferring_phosphorus-containing_groups|#involved_in_protein_phosphorylation|#located_in_plasma_membrane	cd13983-STKc_WNK|cl21453-PKc_like|smart00220-S_TKc	--	--
Ca_06870	Ca_06870.1|Ca_LG_3:31261790-31263620|plus|	-1.96108	0.00573121	yes	yes	0.954434	0.279412	31261790	31263620	+	NAC domain protein	PTHR31744 PTHR31744	IPR003441	PF02365	GO:0003677 GO:0006355	PS51005	SSF10194	NAC_domain-containing_protein_100	XM_004493081.1	#has_DNA_binding|#involved_in_regulation_of_transcription,_DNA-dependent|#located_in_nucleus	cl03558-NAM	NAC	--
Ca_02558	Ca_02558.1|Ca_LG_1:36907141-36913309|minus|	3.78647	0.00680834	yes	yes	0.82782	-0.22124	36907141	36913309	-	metacaspase 3	PTHR31773 PTHR31773	IPR011600	PF00656	GO:0004197 GO:0006508		SSF52129	Metacaspase-1	XM_004485532.1	#involved_in_proteolysis	cl00042-CASc	--	--
Ca_15016	Ca_15016.1|Ca_LG_5:43942520-43944430|plus|	-2.27334	0.00803432	yes	yes	0.954434	0.320588	43942520	43944430	+	DNAJ homologue 2	PTHR24077 PTHR24077	IPR001623 IPR002939 IPR008971 IPR018253	PF00226 PF01556	GO:0006457 GO:0051082	PS00636 PS50076	SSF46565 SSF49493	DnaJ_homolog_subfamily_B_member_4	XM_004501220.1	#has_heat_shock_protein_binding|#has_unfolded_protein_binding|#involved_in_protein_folding|#located_in_cytoplasm	COG0484-DnaJ|cd06257-DnaJ|cd10747-DnaJ_C|cl02542-DnaJ|cl21722-DnaJ_C	--	--
Ca_06448	Ca_06448.1|Ca_LG_3:26075019-26078174|plus|	-1.83479	0.00900213	yes	yes	0.954434	0.214706	26075019	26078174	+	C2 calcium/lipid-binding and GRAM domain containing protein	PTHR10024 PTHR10024	IPR000008 IPR013583	PF00168 PF08372	GO:0005515	PS50004	SSF49562	Multiple_C2_and_transmembrane_domain-containing_protein_2	XM_004492656.1	#located_in_nucleus	cd04019-C2C_MCTP_PRT_plant|cd04022-C2A_MCTP_PRT_plant|cd08378-C2B_MCTP_PRT_plant|cd08379-C2D_MCTP_PRT_plant|cl07117-PRT_C|cl14603-C2	--	--
Ca_07672	Ca_07672.1|Ca_LG_3:38876576-38877779|minus|	2.75437	0.00917397	yes	yes	0.988699	-0.282561	38876576	38877779	-	Ribose 5-phosphate isomerase n=2 Tax=Clostridium RepID=D8GKY8_CLOLD	PTHR30345 PTHR30345	IPR003500 IPR011051 IPR012100 IPR013096 IPR014710	PF02502 PF07883	GO:0005975 GO:0016853		SSF51182 SSF89623	DNA-damage-repair/toleration_protein_DRT102	XM_004494624.1	#involved_in_carbohydrate_metabolic_process|#located_in_cytosol|#located_in_nucleus	cl00485-LacAB_rpiB|cl21464-ABD	--	--
Ca_19673	Ca_19673.1|Ca_LG_7:10574332-10576424|minus|	-2.26089	0.00956729	yes	yes	0.82782	0.582353	10574332	10576424	-	ATP binding/protein serine/threonine kinase [Glycine max]	PTHR24420 PTHR24420	IPR000719 IPR001245 IPR001611 IPR002290 IPR003591 IPR008271 IPR011009 IPR013320 IPR017441	PF00560 PF07714 PF13516 PF13855		PS00107 PS00108 PS50011		Probable_LRR_receptor-like_serine/threonine-protein_kinase_At3g47570	XM_004509870.1	#has_ATP_binding|#has_protein_kinase_activity|#has_protein_serine/threonine_kinase_activity|#has_transferase_activity,_transferring_phosphorus-containing_groups|#involved_in_protein_phosphorylation|#located_in_plasma_membrane	cl21453-PKc_like|cl22710-LRR_RI	--	--
Ca_07030	Ca_07030.1|Ca_LG_3:32960113-32966613|plus|	2.10734	0.0121291	yes	yes	0.954434	-0.29186	32960113	32966613	+	1-acyl-sn-glycerol-3-phosphate acyltransferase-like protein	PTHR10983 PTHR10983	IPR002123	PF01553	GO:0008152 GO:0016746		SSF69593	1-acyl-sn-glycerol-3-phosphate_acyltransferase_PLS1	XM_004493470.1	#has_transferase_activity,_transferring_acyl_groups|#involved_in_metabolic_process|#located_in_extracellular_region	PLN02380-PLN02380|cd07990-LPLAT_LCLAT1-like|cl17185-LPLAT	--	--
Ca_01263	Ca_01263.1|Ca_LG_1:17137697-17138110|minus|	-2.09585	0.0125053	yes	yes	0.954434	0.285294	17137697	17138110	-	unknown protein							--	XM_004488515.1	--	--	--	--
Ca_03425	Ca_03425.1|Ca_LG_2:6469791-6474807|plus|	2.52622	0.0136499	yes	no	0.988699	0.776318	6469791	6474807	+	2-oxoglutarate (2OG) and Fe(II)-dependent oxygenase superfamily protein	PTHR10209 PTHR10209	IPR002283 IPR005123 IPR026992 IPR027443	PF03171 PF14226	GO:0005506 GO:0016491 GO:0016706 GO:0055114	PS51471	SSF51197	Leucoanthocyanidin_dioxygenase	XM_004514156.1	#has_iron_ion_binding|#has_oxidoreductase_activity|#has_oxidoreductase_activity,_acting_on_paired_donors,_with_incorporation_or_reduction_of_molecular_oxygen,_2-oxoglutarate_as_one_donor,_and_incorporation_of_one_atom_each_of_oxygen_into_both_donors|#involved_in_oxidation-reduction_process|#located_in_cytoplasm	PLN02393-PLN02393|cl21496-2OG-FeII_Oxy|cl21672-DIOX_N	--	--
Ca_05081	Ca_05081.1|Ca_LG_3:526852-530683|minus|	-2.09399	0.0136499	yes	no	0.988699	-0.720588	526852	530683	-	lysosomal beta glucosidase-like isoform X4 [Glycine max]	PTHR30620 PTHR30620	IPR001764 IPR002772 IPR017853 IPR026892	PF00933 PF01915	GO:0004553 GO:0005975		SSF51445 SSF52279	Lysosomal_beta_glucosidase	XM_004493125.1	#has_hydrolase_activity,_hydrolyzing_O-glycosyl_compounds|#involved_in_carbohydrate_metabolic_process|#located_in_extracellular_region	cl07971-Glyco_hydro_3|cl22287-Glyco_hydro_3_C	--	--
Ca_16970	Ca_16970.1|Ca_LG_6:20685520-20686932|minus|	1.81518	0.0144903	yes	yes	0.988699	-0.208824	20685520	20686932	-	Leucine-rich repeat receptor-like protein kinase family protein	PTHR24420	IPR001611 IPR013210	PF00560 PF08263	GO:0005515 GO:0006952		SSF52058	Uncharacterized_protein_At4g06744	XM_004505199.1	#located_in_chloroplast|#located_in_plasma_membrane	cl08472-LRRNT_2	--	--
Ca_10442	Ca_10442.1|Ca_LG_4:30062094-30067686|plus|	-1.57398	0.0160429	yes	yes	0.82782	0.585294	30062094	30067686	+	receptor-like protein kinase 4	PTHR24420	IPR000719 IPR002290 IPR008271 IPR011009 IPR025287	PF00069 PF13947	GO:0004672 GO:0004674 GO:0005524 GO:0006468 GO:0016772 GO:0030247	PS00108 PS50011	SSF56112	Probable_receptor-like_protein_kinase_At5g39030	XM_004498431.1	#has_ATP_binding|#has_protein_kinase_activity|#has_protein_serine/threonine_kinase_activity|#has_transferase_activity,_transferring_phosphorus-containing_groups|#involved_in_protein_phosphorylation|#located_in_plasma_membrane	cl16494-GUB_WAK_bind|cl21453-PKc_like|smart00219-TyrKc	--	--
Ca_19609	Ca_19609.1|Ca_LG_7:9307398-9309160|minus|	2.24822	0.0178871	yes	yes	0.988699	-0.164706	9307398	9309160	-	MLP-like protein 43	PTHR31338 PTHR31338	IPR000916 IPR023393 IPR024948	PF00407	GO:0006952 GO:0009607		SSF55961	MLP-like_protein_43	XM_004511119.1	#involved_in_defense_response|#located_in_cytoplasm	cl14643-SRPBCC	--	--
Ca_10167	Ca_10167.1|Ca_LG_4:26647340-26649225|plus|	3.71287	0.018596	yes	yes	0.988699	-0.203541	26647340	26649225	+	Water-selective transport intrinsic membrane protein 1 n=1 Tax=Lotus japonicus RepID=Q9LKJ6_LOTJA	PTHR19139 PTHR19139	IPR000425 IPR022357 IPR023271	PF00230	GO:0005215 GO:0006810 GO:0016020	PS00221	SSF81338	Aquaporin_TIP4-1	XM_004498414.1	#has_transporter_activity|#involved_in_transmembrane_transport|#involved_in_transport|#involved_in_water_transport|#located_in_cytoplasm|#located_in_integral_to_membrane|#located_in_membrane	cd00333-MIP|cl00200-MIP	--	--
Ca_10063	Ca_10063.1|Ca_LG_4:25425373-25429362|minus|	2.85299	0.0187307	yes	yes	0.811278	-0.309051	25425373	25429362	-	probable pectinesterase/pectinesterase inhibitor 34-like [Glycine max]	PTHR31707 PTHR31707	IPR000070 IPR006501 IPR011050 IPR012334 IPR018040	PF01095 PF04043	GO:0004857 GO:0005618 GO:0030599 GO:0042545	PS00503	SSF10114 SSF51126	Probable_pectinesterase/pectinesterase_inhibitor_34	XM_004498459.1	#has_enzyme_inhibitor_activity|#has_pectinesterase_activity|#involved_in_cell_wall_modification|#located_in_cell_wall	PLN02484-PLN02484|cd15798-PMEI-like_3|cl01911-Pectinesterase|cl04375-PMEI_like	--	--
Ca_11932	Ca_11932.1|Ca_LG_5:730450-732937|minus|	2.03583	0.0190382	yes	yes	0.988699	-0.294118	730450	732937	-	inactive poly [ADP-ribose] polymerase RCD1	PTHR32263 PTHR32263	IPR012317 IPR022003	PF12174	GO:0003950	PS51059	SSF56399	Inactive_poly_[ADP-ribose]_polymerase_RCD1	XM_004512438.1	#has_NAD+_ADP-ribosyltransferase_activity|#located_in_nucleus	cl02729-WWE|cl13590-RST	--	--
Ca_01466	Ca_01466.1|Ca_LG_1:21349545-21351059|minus|	-2.84229	0.0197131	yes	yes	1	0.861765	21349545	21351059	-	putative nuclease HARBI1-like [Glycine max]	PTHR22930 PTHR22930	IPR026103 IPR027806	PF13359				Putative_nuclease_HARBI1	XM_004513387.1	#located_in_chloroplast|#located_in_membrane|#located_in_nucleus|#located_in_plasma_membrane|#located_in_vacuolar_membrane	cl21562-DDE_Tnp_1_6	SBP	--
Ca_11874	Ca_11874.1|Ca_LG_4:54839195-54846656|minus|	-2.36572	0.0204734	yes	yes	0.954434	0.285294	54839195	54846656	-	ADP-ribosylation factor GTPase-activating protein AGD12-like isoform X1 [Glycine max]	PTHR23180 PTHR23180	IPR000008 IPR001164	PF00168 PF01412	GO:0005515 GO:0008060 GO:0008270 GO:0032312	PS50004 PS50115	SSF49562 SSF57863	Probable_ADP-ribosylation_factor_GTPase-activating_protein_AGD11	XM_004514418.1	#has_ARF_GTPase_activator_activity|#has_zinc_ion_binding|#involved_in_regulation_of_ARF_GTPase_activity|#located_in_nucleus	cd04038-C2_ArfGAP|cl02464-ArfGap|cl14603-C2	G2-like	--
Ca_14878	Ca_14878.1|Ca_LG_5:42346810-42348853|minus|	-2.86257	0.0204734	yes	yes	0.954434	0.325239	42346810	42348853	-	N-terminal nucleophile aminohydrolases (Ntn hydrolases) superfamily protein	PTHR10188 PTHR10188	IPR000246	PF01112	GO:0016787		SSF56235	Probable_isoaspartyl_peptidase/L-asparaginase_2	XM_004501493.1	#has_hydrolase_activity|#located_in_cytoplasm	cd04701-Asparaginase_2|cl00635-Ntn_Asparaginase_2_like	--	--
Ca_20467	Ca_20467.1|Ca_LG_7:26170209-26172494|minus|	1.79046	0.0204734	yes	no	0.816519	0.644118	26170209	26172494	-	peptide transporter 2	PTHR11654 PTHR11654	IPR000109 IPR016196	PF00854	GO:0005215 GO:0006810 GO:0016020		SSF10347	Nitrate_transporter_1.5	XM_004506471.1	#has_transporter_activity|#involved_in_oligopeptide_transport|#located_in_membrane|#located_in_plasma_membrane	cl21472-MFS	--	--
Ca_23528	Ca_23528.1|Ca_LG_8:16462851-16468194|plus|	-1.25106	0.0218504	yes	yes	0.954434	0.338235	16462851	16468194	+	uncharacterized protein LOC100777314 isoform X4 [Glycine max]	PTHR31808 PTHR31808	IPR008479	PF05542				--	XM_004512407.1	#located_in_chloroplast|#located_in_chloroplast_stroma|#located_in_nucleus	cl09377-DUF760	--	--
Ca_01506	Ca_01506.1|Ca_LG_1:22330148-22332515|minus|	4.5753	0.0235231	yes	yes	0.954434	-0.7	22330148	22332515	-	Flavin-binding monooxygenase family protein	PTHR23023 PTHR23023	IPR020946	PF00743	GO:0004499 GO:0050660 GO:0050661 GO:0055114	PS51257	SSF51905	Probable_flavin-containing_monooxygenase_1	XM_004514010.1	#has_N,N-dimethylaniline_monooxygenase_activity|#has_NADP_binding|#has_flavin_adenine_dinucleotide_binding|#has_oxidoreductase_activity|#involved_in_oxidation-reduction_process|#located_in_chloroplast|#located_in_intrinsic_to_endoplasmic_reticulum_membrane	COG2072-TrkA|cl21454-SDR	--	--
Ca_14639	Ca_14639.1|Ca_LG_5:39851058-39855580|minus|	-1.81022	0.0241541	yes	yes	0.954434	0.311765	39851058	39855580	-	Sulfite exporter TauE/SafE family protein	PTHR14255	IPR002781	PF01925	GO:0016021			--	XM_004501716.1	#located_in_chloroplast|#located_in_integral_to_membrane	cl21514-TauE	--	--
Ca_12670	Ca_12670.1|Ca_LG_5:13922915-13926361|minus|	-1.53339	0.024589	yes	yes	0.82782	0.591176	13922915	13926361	-	Protein kinase superfamily protein	PTHR24420	IPR000719 IPR001245 IPR002290 IPR008271 IPR011009 IPR013320 IPR017441	PF07714	GO:0004672 GO:0004674 GO:0005524 GO:0006468 GO:0016772	PS00107 PS00108 PS50011	SSF56112	Calmodulin-binding_receptor-like_cytoplasmic_kinase_1	XM_004500164.1	#located_in_plasma_membrane	cl21453-PKc_like|smart00221-STYKc	--	--
Ca_11964	Ca_11964.1|Ca_LG_5:1178575-1184554|plus|	-3.19345	0.0251398	yes	no	0.811278	-0.635762	1178575	1184554	+	ABC transporter family protein (ATP-binding component)	PTHR24222 PTHR24222	IPR001140 IPR003439 IPR003593 IPR011527 IPR017871 IPR027417	PF00005 PF00664	GO:0000166 GO:0005524 GO:0006810 GO:0016021 GO:0016887 GO:0017111 GO:0042626 GO:0055085	PS00211 PS50893 PS50929	SSF52540 SSF90123	ABC_transporter_B_family_member_26,_chloroplastic	XM_004489723.1	#has_ATP_binding|#has_ATPase_activity|#has_ATPase_activity,_coupled_to_transmembrane_movement_of_substances|#has_nucleoside-triphosphatase_activity|#has_nucleotide_binding|#involved_in_transmembrane_transport|#involved_in_transport|#located_in_chloroplast|#located_in_chloroplast_envelope|#located_in_integral_to_membrane	COG1132-MdlB|cl00549-ABC_membrane|cl21455-ABC_ATPase	--	--
Ca_17214	Ca_17214.1|Ca_LG_6:23393517-23396414|minus|	3.54893	0.025258	yes	yes	0.954434	-0.327416	23393517	23396414	-	fiber protein Fb34	PTHR31769 PTHR31769	IPR009606	PF06749				--	XM_004505563.1	#located_in_extracellular_region	cl06009-DUF1218	--	--
Ca_08179	Ca_08179.1|Ca_LG_4:2151570-2155210|minus|	2.60406	0.026928	yes	yes	0.988699	-0.223529	2151570	2155210	-	enolase-phosphatase E1-like isoform X4 [Glycine max]							--	XM_004495977.1	#located_in_cytoplasm	PTZ00121-PTZ00121	--	--
Ca_17630	Ca_17630.1|Ca_LG_6:29896698-29898757|minus|	-1.72552	0.026928	yes	yes	0.82782	0.682353	29896698	29898757	-	protein kinase family protein	PTHR24420	IPR000719 IPR002290 IPR008271 IPR009091 IPR011009 IPR013320 IPR017441	PF00069	GO:0004672 GO:0004674 GO:0005524 GO:0006468 GO:0016772	PS00107 PS00108 PS50011	SSF50985 SSF56112	Serine/threonine-protein_kinase-like_protein_CCR4	XM_004506314.1	#has_ATP_binding|#has_protein_kinase_activity|#has_protein_serine/threonine_kinase_activity|#has_transferase_activity,_transferring_phosphorus-containing_groups|#involved_in_protein_phosphorylation|#located_in_plasma_membrane	cd14066-STKc_IRAK|cl21453-PKc_like	--	--
Ca_15223	Ca_15223.1|Ca_LG_6:489021-489564|plus|	-1.80995	0.0271993	yes	yes	0.816519	0.810891	489021	489564	+	SAUR-like auxin-responsive protein family	PTHR31929	IPR003676	PF02519	GO:0009733			Auxin-induced_protein_X10A	XM_004506942.1	#located_in_chloroplast|#located_in_plasma_membrane	cl03633-Auxin_inducible	--	--
Ca_21420	Ca_21420.1|Ca_LG_7:37702881-37705183|minus|	4.64105	0.0276006	yes	yes	0.811278	-0.32149	37702881	37705183	-	GDSL-like Lipase/Acylhydrolase superfamily protein	PTHR22835	IPR001087 IPR013831	PF00657	GO:0006629 GO:0016787 GO:0016788		SSF52266	GDSL_esterase/lipase_At1g74460	XM_004508672.1	#has_hydrolase_activity,_acting_on_ester_bonds|#involved_in_lipid_metabolic_process|#located_in_extracellular_region	cd01837-SGNH_plant_lipase_like|cl01053-SGNH_hydrolase	--	--
Ca_10823	Ca_10823.1|Ca_LG_4:34194340-34196382|minus|	-1.51638	0.0286456	yes	yes	0.811278	0.220588	34194340	34196382	-	unknown protein							--	XM_004513375.1	#located_in_nucleus	--	--	--
Ca_04814	Ca_04814.1|Ca_LG_2:29898284-29903645|plus|	1.51831	0.0289191	yes	yes	0.811278	-0.111765	29898284	29903645	+	Bifunctional dihydroflavonol 4-reductase/flavanone 4-reductase isoform 1 n=2 Tax=Theobroma cacao RepID=UPI00042B2159	PTHR30603	IPR005344	PF03661	GO:0016021			--	XM_004514376.1	#located_in_integral_to_membrane|#located_in_membrane|#located_in_mitochondrion|#located_in_plasmodesma	cl04200-UPF0121	--	--
Ca_02367	Ca_02367.1|Ca_LG_1:35155861-35161971|minus|	3.46384	0.0315766	yes	yes	0.811278	-0.330379	35155861	35161971	-	1-deoxy-D-xylulose 5-phosphate synthase 1	PTHR11624 PTHR11624	IPR005474 IPR005475 IPR005476 IPR005477 IPR009014 IPR020826	PF02779 PF02780 PF13292	GO:0003824 GO:0008152 GO:0008661 GO:0016114	PS00801 PS00802	SSF52518 SSF52922	1-deoxy-D-xylulose-5-phosphate_synthase	AK339504.1	#has_1-deoxy-D-xylulose-5-phosphate_synthase_activity|#has_catalytic_activity|#involved_in_metabolic_process|#involved_in_terpenoid_biosynthetic_process	PLN02582-PLN02582|cd02007-TPP_DXS|cd07033-TPP_PYR_DXS_TK_like|cl01629-TPP_enzymes|cl08363-Transketolase_C|cl11410-TPP_enzyme_PYR	--	--
Ca_03716	Ca_03716.1|Ca_LG_2:10507214-10509171|minus|	-1.85201	0.0315766	yes	yes	0.811278	0.255882	10507214	10509171	-	acyl-CoA synthetase 5	PTHR24095	IPR000873 IPR020845 IPR025110	PF00501 PF13193	GO:0003824 GO:0008152	PS00455	SSF56801	Probable_acyl-activating_enzyme_10	XM_004490692.1	#has_catalytic_activity|#involved_in_metabolic_process|#located_in_mitochondrion	PRK08162-PRK08162|cd12118-ttLC_FACS_AEE21_like|cl17068-AFD_class_I	--	--
Ca_01475	Ca_01475.1|Ca_LG_1:21479535-21482298|minus|	-2.62048	0.0317681	yes	no	0.816519	-0.626471	21479535	21482409	-	C2-H2 zinc finger protein [Glycine max]	PTHR10593 PTHR10593	IPR007087 IPR013087 IPR015880		GO:0003676 GO:0046872	PS00028 PS50157	SSF57667	Zinc_finger_protein_MAGPIE	XM_004498822.1	#has_zinc_ion_binding|#located_in_intracellular|#located_in_nucleus	--	C2H2	--
Ca_02840	Ca_02840.1|Ca_LG_1:39467727-39470380|minus|	2.87975	0.0321074	yes	no	0.863699	0.78216	39467727	39470380	-	nodulin MtN21 /EamA-like transporter family protein	PTHR31218 PTHR31218	IPR000620	PF00892	GO:0016020		SSF10348	WAT1-related_protein_At1g25270	XM_004486185.1	#located_in_extracellular_region|#located_in_membrane	COG0697-RhaT|cl00910-EamA	--	--
Ca_00394	Ca_00394.1|Ca_LG_1:4112532-4114454|minus|	-1.94144	0.0339525	yes	yes	0.954434	0.285294	4112532	4114454	-	NAC domain containing protein 2	PTHR31719 PTHR31719	IPR003441	PF02365	GO:0003677 GO:0006355	PS51005	SSF10194	NAC_transcription_factor_NAM-2	XM_004487621.1	#has_DNA_binding|#involved_in_regulation_of_transcription,_DNA-dependent|#located_in_nucleus	cl03558-NAM	NAC	--
Ca_22282	Ca_22282.1|Ca_LG_8:1211187-1214671|plus|	1.41292	0.0343281	yes	no	0.811278	0.644118	1211187	1214671	+	beta glucosidase 11	PTHR10353	IPR001360 IPR013781 IPR017853 IPR018120	PF00232	GO:0004553 GO:0005975	PS00653	SSF51445	Beta-glucosidase_10	XM_004514168.1	#has_catalytic_activity|#has_cation_binding|#has_hydrolase_activity,_hydrolyzing_O-glycosyl_compounds|#located_in_vacuole	cl01046-BglB	--	--
Ca_05318	Ca_05318.1|Ca_LG_3:3969270-3971388|plus|	3.10242	0.0355776	yes	yes	0.954434	-0.312601	3969270	3971388	+	MYB transcription factor MYB51 [Glycine max]	PTHR25040 PTHR25040	IPR001005 IPR006447 IPR009057 IPR017884 IPR017930	PF00249	GO:0003677 GO:0003682	PS51293 PS51294	SSF46689	Transcription_factor_DIVARICATA	XM_004492358.1	#has_DNA_binding|#located_in_nucleus	cd00167-SANT|cl21498-SANT	MYB	--
Ca_25707	Ca_25707.1|scaffold03617:17181-21027|plus|	-1.43914	0.0358881	yes	yes	0.954434	0.361765	17181	21027	+	ATP binding/protein serine/threonine kinase [Glycine max]	PTHR24420 PTHR24420	IPR000719 IPR001611 IPR002290 IPR003591 IPR008271 IPR011009 IPR013210 IPR017441	PF00069 PF00560 PF08263 PF13516 PF13855		PS00107 PS00108 PS50011 PS51450	SSF52058	Probable_LRR_receptor-like_serine/threonine-protein_kinase_At1g74360	XM_004499458.1	#has_ATP_binding|#has_protein_kinase_activity|#has_protein_serine/threonine_kinase_activity|#has_transferase_activity,_transferring_phosphorus-containing_groups|#involved_in_protein_phosphorylation|#located_in_plasma_membrane	PLN00113-PLN00113|cd14066-STKc_IRAK|cl21453-PKc_like|cl22710-LRR_RI	--	--
Ca_08923	Ca_08923.1|Ca_LG_4:11189397-11189612|plus|	2.07457	0.0364638	yes	no	0.811278	0.80743	11189397	11189612	+	hypothetical protein							--	--	--	--	--	--
Ca_06319	Ca_06319.1|Ca_LG_3:23935684-23937325|minus|	-1.45858	0.039079	yes	yes	0.811278	0.241176	23935684	23937325	-	serine/threonine-protein kinase TIO-like [Glycine max]	PTHR24347 PTHR24347	IPR000719 IPR002290 IPR004041 IPR008271 IPR011009 IPR017441 IPR018451 IPR020636	PF00069 PF03822	GO:0004672 GO:0004674 GO:0005524 GO:0006468 GO:0007165	PS00107 PS00108 PS50011 PS50816	SSF56112	CBL-interacting_serine/threonine-protein_kinase_11	XM_004492489.1	#involved_in_protein_phosphorylation|#involved_in_signal_transduction|#located_in_plasma_membrane	cd12195-CIPK_C|cl17070-AMPKA_C_like|cl21453-PKc_like|smart00220-S_TKc	--	--
Ca_27109	Ca_27109.1|scaffold06957:1979-3092|minus|	-1.88816	0.0417611	yes	yes	0.954434	0.267647	1979	3092	-	putative clathrin assembly protein At4g40080-like [Glycine max]	PTHR22951 PTHR22951	IPR008942 IPR011417 IPR013809	PF07651	GO:0005543		SSF48464	Putative_clathrin_assembly_protein_At4g40080	XM_004501623.1	#has_phospholipid_binding|#located_in_mitochondrion	cl02544-VHS_ENTH_ANTH	--	--
Ca_13633	Ca_13633.1|Ca_LG_5:29808764-29811624|minus|	-1.30389	0.0425187	yes	no	0.988699	-0.711765	29808764	29811624	-	selenium-binding protein 1	PTHR23300 PTHR23300	IPR008826 IPR015943	PF05694	GO:0005515 GO:0008430		SSF75011	Selenium-binding_protein_1	XM_004502192.1	#has_selenium_binding|#located_in_nucleus	cl22313-SBP56	--	--
Ca_18865	Ca_18865.1|Ca_LG_6:52700748-52709619|minus|	1.03153	0.0425187	yes	no	0.816519	0.479412	52700748	52709619	-	glutathione reductase	PTHR22912 PTHR22912	IPR001327 IPR004099 IPR013027 IPR016156 IPR023753	PF00070 PF02852 PF07992	GO:0016491 GO:0045454 GO:0050660 GO:0055114		SSF51905 SSF55424	Glutathione_reductase,_cytosolic	XM_004514633.1	#has_NADP_binding|#has_electron_carrier_activity|#has_flavin_adenine_dinucleotide_binding|#has_glutathione-disulfide_reductase_activity|#has_oxidoreductase_activity|#has_oxidoreductase_activity,_acting_on_a_sulfur_group_of_donors,_NAD(P)_as_acceptor|#involved_in_cell_redox_homeostasis|#involved_in_glutathione_metabolic_process|#involved_in_oxidation-reduction_process|#located_in_cytoplasm|#locate…	cl08372-Pyr_redox_dim|cl21454-SDR	--	--
Ca_06614	Ca_06614.1|Ca_LG_3:28073047-28078003|minus|	3.77808	0.0427903	yes	yes	0.811278	-0.289087	28073047	28078003	-	serine carboxypeptidase-like 20	PTHR11802 PTHR11802	IPR001563 IPR018202	PF00450	GO:0004185 GO:0006508	PS00131 PS00560	SSF53474	Serine_carboxypeptidase_1	XM_004492787.1	#has_serine-type_carboxypeptidase_activity|#involved_in_proteolysis|#located_in_extracellular_region	cl08270-Peptidase_S10	--	--
Ca_26084	Ca_26084.1|scaffold04227:11490-16225|minus|	-2.84324	0.0430639	yes	no	0.988699	-0.744118	11490	16225	-	seed linoleate 9S-lipoxygenase	PTHR11771 PTHR11771	IPR000907 IPR001024 IPR001246 IPR008976 IPR013819 IPR020833 IPR020834 IPR027433	PF00305 PF01477	GO:0006952 GO:0009695	PS00081 PS00711 PS50095 PS51393		Putative_lipoxygenase_5	XM_004510357.1	#located_in_chloroplast	PLN02337-PLN02337|cd01751-PLAT_LH2|cl00011-PLAT|cl09510-Lipoxygenase	--	--
Ca_22488	Ca_22488.1|Ca_LG_8:4298453-4302888|minus|	1.62599	0.0433801	yes	yes	0.988699	-0.309736	4298453	4302888	-	vacuolar sorting receptor 4	PTHR22765 PTHR22765	IPR001881 IPR003137 IPR012336 IPR013032 IPR018097 IPR026823	PF02225 PF12662	GO:0005509	PS01186 PS01187	SSF52025	Vacuolar-sorting_receptor_5	XM_004511255.1	#has_calcium_ion_binding|#located_in_Golgi_apparatus	cd00054-EGF_CA|cd02125-PA_VSR|cl10459-Peptidases_S8_S53|cl21504-EGF_CA	WRKY	--
Ca_13608	Ca_13608.1|Ca_LG_5:29465554-29466549|minus|	1.19325	0.0443391	yes	yes	0.811278	-0.332353	29465554	29466549	-	nuclear transport factor 2A	PTHR12612	IPR002075 IPR018222	PF02136	GO:0005622 GO:0006810	PS50177	SSF54427	Nuclear_transport_factor_2	XM_004502225.1	#involved_in_transport|#located_in_cytoplasm	cd00780-NTF2|cl09109-NTF2_like	--	--
Ca_21102	Ca_21102.1|Ca_LG_7:34242490-34247178|plus|	2.30032	0.0455395	yes	yes	0.988699	-0.197204	34242490	34247178	+	L-ascorbate oxidase homolog [Glycine max]	PTHR11709 PTHR11709	IPR001117 IPR008972 IPR011706 IPR011707	PF00394 PF07731 PF07732	GO:0005507 GO:0016491 GO:0055114		SSF49503	Monocopper_oxidase-like_protein_SKS1	XM_004515681.1	#has_copper_ion_binding|#has_oxidoreductase_activity|#involved_in_oxidation-reduction_process|#located_in_extracellular_region|#located_in_plasma_membrane|#located_in_plasmodesma	PLN00044-PLN00044|cl19115-Cupredoxin	--	--
Ca_14678	Ca_14678.1|Ca_LG_5:40289993-40293141|plus|	2.45773	0.0457257	yes	yes	0.811278	-0.318527	40289993	40293141	+	ATP binding/protein serine/threonine kinase [Glycine max]	PTHR24420 PTHR24420	IPR000719 IPR001611 IPR002290 IPR008271 IPR011009 IPR013210 IPR017441	PF00069 PF00560 PF08263 PF13516	GO:0004672 GO:0004674	PS00107 PS00108 PS50011	SSF52058 SSF56112	Receptor-like_protein_kinase_HAIKU2	XM_004501014.1	#has_ATP_binding|#has_protein_kinase_activity|#has_protein_serine/threonine_kinase_activity|#has_transferase_activity,_transferring_phosphorus-containing_groups|#involved_in_protein_phosphorylation|#located_in_plasma_membrane	PLN00113-PLN00113|cl08472-LRRNT_2|cl21453-PKc_like|cl22710-LRR_RI	--	--
Ca_02619	Ca_02619.1|Ca_LG_1:37416372-37416958|plus|	3.62289	0.0528404	yes	no	0.954434	0.743366	37416372	37416958	+	c("CAP (Cysteine-rich secretory proteins"	PTHR10334	IPR001283 IPR002413 IPR014044 IPR018244	PF00188	GO:0005576 GO:0009751 GO:0009607 GO:0006952	PS01010	SSF55797	Pathogenesis-related_protein_1B	XM_004485599.1	#located_in_extracellular_region	cd05381-SCP_PR-1_like|cl00133-SCP	--	--
Ca_07890	Ca_07890.1|Ca_LG_3:40933555-40936128|plus|	-1.46842	0.0538325	yes	yes	0.954434	0.261765	40933555	40936128	+	HVA22-like protein J	PTHR12300 PTHR12300	IPR004345	PF03134				HVA22-like_protein_j_	XM_004494181.1	--	cl19882-TB2_DP1_HVA22	--	--
Ca_18713	Ca_18713.1|Ca_LG_6:50954661-50960402|minus|	2.53792	0.0538325	yes	yes	0.988699	-0.277287	50954661	50960402	-	c("Calreticulin 2"	PTHR11073	IPR001580 IPR008985 IPR009033 IPR009169 IPR013320 IPR018124	PF00262	GO:0005509 GO:0005515 GO:0005783 GO:0006457 GO:0051082	PS00803 PS00804	SSF49899 SSF63887	Calreticulin-3	XM_004507292.1	#has_calcium_ion_binding|#has_unfolded_protein_binding|#involved_in_protein_folding|#located_in_chloroplast|#located_in_endoplasmic_reticulum	cl02828-Calreticulin	--	--
Ca_25422	Ca_25422.1|scaffold03192:12326-15991|minus|	1.66957	0.0543037	yes	yes	0.988699	-0.158824	12326	15991	-	phosphate transporter 1	PTHR24064 PTHR24064	IPR004738 IPR005828 IPR016196 IPR020846	PF00083	GO:0005315 GO:0006817 GO:0016021 GO:0022857 GO:0055085	PS50850	SSF10347	Putative_inorganic_phosphate_transporter_1-13	XM_004502090.1	#has_inorganic_phosphate_transmembrane_transporter_activity|#has_transmembrane_transporter_activity|#has_transporter_activity|#involved_in_phosphate_ion_transport|#involved_in_transmembrane_transport|#involved_in_transport|#located_in_integral_to_membrane|#located_in_membrane	TIGR00887-Inorganic_phosphate_transporter_PHO84|cd06174-MFS|cl21472-MFS	--	--
Ca_21348	Ca_21348.1|Ca_LG_7:36974486-36980796|minus|	1.38577	0.054371	yes	yes	0.988699	-0.300221	36974486	36980796	-	plasma membrane H+-ATPase	PTHR24093 PTHR24093	IPR001757 IPR004014 IPR006534 IPR008250 IPR018303 IPR023214 IPR023298 IPR023299	PF00122 PF00690 PF00702		PS00154	SSF56784	Probable_plasma_membrane_ATPase	XM_004508732.1	#has_ATP_binding|#has_ATPase_activity|#has_ATPase_activity,_coupled_to_transmembrane_movement_of_ions,_phosphorylative_mechanism|#has_catalytic_activity|#has_metal_ion_binding|#has_nucleotide_binding|#involved_in_ATP_biosynthetic_process|#involved_in_ATP_catabolic_process|#involved_in_cation_transport|#involved_in_metabolic_process|#located_in_integral_to_membrane|#located_in_membrane|#located_in…	COG4087-COG4087|TIGR01647-Plasma_membrane_ATPase|cl02811-E1-E2_ATPase|cl02930-Cation_ATPase_N|cl16182-Hydrolase_like2|cl21460-HAD_like|smart00831-Cation_ATPase_N	--	--
Ca_29407	Ca_29407.1|scaffold19664:2071-4753|minus|	7.22357	3.36e-16	no	NA	NA	NA	2071	4753	-	Sugar transporter SWEET n=2 Tax=Pooideae RepID=I1HKV5_BRADI	PTHR10791	IPR004316	PF03083	GO:0016021			Bidirectional_sugar_transporter_SWEET3	XM_004498340.1	#located_in_integral_to_membrane|#located_in_plasma_membrane	cl21610-PQ-loop	--	--
Ca_04037	Ca_04037.1|Ca_LG_2:16257141-16259678|minus|	7.24831	9e-11	no	NA	NA	NA	16257141	16259678	-	Peroxidase superfamily protein	PTHR31388 PTHR31388	IPR000823 IPR002016 IPR010255 IPR019793 IPR019794	PF00141	GO:0004601 GO:0006979 GO:0020037 GO:0055114	PS00435 PS00436 PS50873	SSF48113	Peroxidase_11	XM_004490259.1	#has_heme_binding|#has_peroxidase_activity|#involved_in_oxidation-reduction_process|#involved_in_response_to_oxidative_stress|#located_in_extracellular_region	cd00693-secretory_peroxidase|cl00196-plant_peroxidase_like	--	--
Ca_05312	Ca_05312.1|Ca_LG_3:3880501-3883144|plus|	4.01645	1.01e-10	no	NA	NA	NA	3880501	3883144	+	pectinesterase/pectinesterase inhibitor 18-like [Glycine max]	PTHR31707 PTHR31707	IPR000070 IPR006501 IPR011050 IPR012334 IPR018040	PF01095 PF04043	GO:0004857 GO:0005618 GO:0030599 GO:0042545	PS00503 PS00800	SSF10114 SSF51126	Pectinesterase_3	XM_004492171.1	#has_enzyme_inhibitor_activity|#has_pectinesterase_activity|#involved_in_cell_wall_modification|#located_in_cell_wall|#located_in_cytosol|#located_in_vacuolar_membrane	PLN02301-PLN02301|cd15799-PMEI-like_4|cl01911-Pectinesterase|cl04375-PMEI_like	--	--
Ca_16542	Ca_16542.1|Ca_LG_6:15577951-15578775|minus|	6.5654	2.39e-10	no	NA	NA	NA	15577951	15578775	-	leguminosin group485 secreted peptide							--	XM_004504880.1	--	PHA02030-PHA02030	--	--
Ca_22717	Ca_22717.1|Ca_LG_8:6438819-6442086|plus|	5.75655	2.39e-10	no	NA	NA	NA	6438819	6442086	+	ATP binding/protein serine/threonine kinase [Glycine max]	PTHR24420 PTHR24420	IPR000719 IPR001611 IPR002290 IPR008271 IPR011009 IPR013210 IPR017441	PF00069 PF00560 PF08263	GO:0004672	PS00107 PS00108 PS50011 PS51450	SSF52047 SSF52058 SSF56112	Receptor-like_protein_kinase_5	XM_004511742.1	#has_ATP_binding|#has_protein_kinase_activity|#has_protein_serine/threonine_kinase_activity|#has_transferase_activity,_transferring_phosphorus-containing_groups|#located_in_plasma_membrane	PLN00113-PLN00113|cl08472-LRRNT_2|cl21453-PKc_like|cl22710-LRR_RI	--	--
Ca_14714	Ca_14714.1|Ca_LG_5:40634511-40638738|plus|	4.34924	4.31e-10	no	NA	NA	NA	40634511	40638738	+	receptor-like protein kinase 2	PTHR24420 PTHR24420	IPR000719 IPR001611 IPR002290 IPR003591 IPR011009 IPR013210	PF00069 PF00560 PF08263 PF13516 PF13855	GO:0004672 GO:0005515	PS50011 PS51450	SSF52058 SSF56112	Probably_inactive_leucine-rich_repeat_receptor-like_protein_kinase_At2g25790	XM_004501087.1	#has_ATP_binding|#has_protein_kinase_activity|#has_transferase_activity,_transferring_phosphorus-containing_groups|#involved_in_protein_phosphorylation|#located_in_plasma_membrane	PLN00113-PLN00113|cl08472-LRRNT_2|cl21453-PKc_like|cl22710-LRR_RI	--	--
Ca_20770	Ca_20770.1|Ca_LG_7:30510155-30511615|minus|	-3.41735	1.53e-09	no	NA	NA	NA	30510155	30511615	-	Peroxidase superfamily protein	PTHR31388 PTHR31388	IPR000823 IPR002016 IPR010255 IPR019793 IPR019794	PF00141	GO:0004601 GO:0006979 GO:0020037 GO:0055114	PS00435 PS00436 PS50873	SSF48113	Peroxidase_52	XM_004509984.1	#has_heme_binding|#has_peroxidase_activity|#involved_in_oxidation-reduction_process|#involved_in_response_to_oxidative_stress|#located_in_Golgi_apparatus|#located_in_apoplast|#located_in_cell_wall|#located_in_cytosol|#located_in_extracellular_region	cd00693-secretory_peroxidase|cl00196-plant_peroxidase_like	--	--
Ca_10793	Ca_10793.1|Ca_LG_4:33771517-33773310|plus|	4.54288	3.55e-09	no	NA	NA	NA	33771517	33773310	+	nodulin MtN21 /EamA-like transporter family protein	PTHR31218 PTHR31218	IPR000620	PF00892	GO:0016020		SSF10348	WAT1-related_protein_At1g44800	XM_004498272.1	#located_in_membrane|#located_in_mitochondrion	cl00910-EamA	--	--
Ca_10296	Ca_10296.1|Ca_LG_4:28288022-28289937|plus|	-4.60165	1.74e-08	no	NA	NA	NA	28288022	28289937	+	Protein of unknown function (DUF677)	PTHR31113 PTHR31113						UPF0496_protein_At3g49070	XM_004496480.1	#has_protein_modification_of_type_N-terminal_protein_myristoylation|#located_in_chloroplast	cl21731-DUF677	--	--
Ca_09961	Ca_09961.1|Ca_LG_4:24144562-24148148|minus|	9.24174	2.18e-08	no	NA	NA	NA	24144562	24148148	-	blue copper protein-like [Glycine max]		IPR003245 IPR008972	PF02298	GO:0005507 GO:0009055	PS51485	SSF49503	Blue_copper_protein	XM_004496025.1	#has_copper_ion_binding|#has_electron_carrier_activity|#located_in_plasma_membrane	cd04216-Phytocyanin|cl19115-Cupredoxin	--	--
Ca_07088	Ca_07088.1|Ca_LG_3:33609593-33613969|minus|	-3.55644	2.5e-08	no	NA	NA	NA	33609593	33613969	-	c("D-arabinono-1"	PTHR13878 PTHR13878	IPR006094 IPR007173 IPR010030 IPR016166 IPR016167 IPR016169	PF01565 PF04030	GO:0003824 GO:0003885 GO:0008762 GO:0016020 GO:0016491 GO:0016614 GO:0050660 GO:0055114	PS51387	SSF56176	L-gulono-1,4-lactone_dehydrogenase	XM_004494806.1	#has_D-arabinono-1,4-lactone_oxidase_activity|#has_UDP-N-acetylmuramate_dehydrogenase_activity|#has_catalytic_activity|#has_flavin_adenine_dinucleotide_binding|#has_oxidoreductase_activity|#has_oxidoreductase_activity,_acting_on_CH-OH_group_of_donors|#involved_in_oxidation-reduction_process|#located_in_membrane	TIGR01677-OSJNBb0057P11_genomic_sequence.|cl19922-FAD_binding_4|cl21623-ALO	--	--
Ca_01349	Ca_01349.1|Ca_LG_1:18996374-18999296|plus|	-4.90618	3.3e-08	no	NA	NA	NA	18996374	18999296	+	uncharacterized protein LOC100820117 [Glycine max]							--	XM_004514477.1	--	--	--	--
Ca_01348	Ca_01348.1|Ca_LG_1:18994800-18996157|minus|	-3.55176	4.85e-08	no	NA	NA	NA	18994800	18996157	-	Eukaryotic aspartyl protease family protein	PTHR13683 PTHR13683	IPR001461 IPR021109	PF14541 PF14543	GO:0004190 GO:0006508		SSF50630	Aspartic_proteinase_CDR1	XM_004488803.1	#has_aspartic-type_endopeptidase_activity|#involved_in_proteolysis|#located_in_extracellular_region	cd05476-pepsin_A_like_plant|cl11403-pepsin_retropepsin_like	--	--
Ca_02266	Ca_02266.1|Ca_LG_1:34090569-34091009|minus|	-3.50542	4.85e-08	no	NA	NA	NA	34090569	34091009	-	uncharacterized protein LOC100796265 [Glycine max]							--	XM_004486089.1	--	--	--	--
Ca_12909	Ca_12909.1|Ca_LG_5:19387530-19392156|minus|	-4.1866	1e-07	no	NA	NA	NA	19387530	19392156	-	non-specific phospholipase C2	PTHR31956 PTHR31956	IPR007312 IPR017850	PF04185	GO:0003824 GO:0008152 GO:0016788		SSF53649	Non-specific_phospholipase_C5	XM_004513896.1	#has_hydrolase_activity,_acting_on_ester_bonds|#located_in_plasma_membrane	cl21476-alkPPc	--	--
Ca_12878	Ca_12878.1|Ca_LG_5:18873935-18881162|plus|	5.53568	1.97e-07	no	NA	NA	NA	18873935	18881162	+	MATE efflux family protein	PTHR11206 PTHR11206	IPR002528	PF01554	GO:0006855 GO:0015238 GO:0015297 GO:0016020 GO:0055085			MATE_efflux_family_protein_1	XM_004499824.1	#has_antiporter_activity|#has_drug_transmembrane_transporter_activity|#involved_in_drug_transmembrane_transport|#involved_in_transmembrane_transport|#located_in_membrane|#located_in_plasma_membrane	TIGR00797-Multidrug_resistance_protein_HmrM|cd13136-MATE_DinF_like|cl09326-MATE_like	--	--
Ca_24766	Ca_24766.1|scaffold02119:46494-46985|plus|	-4.16367	2.03e-07	no	NA	NA	NA	46494	46985	+	uncharacterized protein LOC100796265 [Glycine max]		IPR025322	PF14009				--	XM_004486100.1	#has_protein_modification_of_type_N-terminal_protein_myristoylation|#located_in_nucleus	cl16533-DUF4228	--	--
Ca_07114	Ca_07114.1|Ca_LG_3:33778881-33779543|minus|	-3.56764	2.19e-07	no	NA	NA	NA	33778881	33779543	-	pectinesterase family protein	PTHR31707 PTHR31707	IPR000070 IPR011050 IPR012334 IPR018040	PF01095	GO:0005618 GO:0030599 GO:0042545	PS00503	SSF51126	Probable_pectinesterase/pectinesterase_inhibitor_41	XM_004494331.1	#has_enzyme_inhibitor_activity|#has_pectinesterase_activity|#involved_in_cell_wall_modification|#located_in_cell_wall|#located_in_extracellular_region	cl01911-Pectinesterase	--	--
Ca_09043	Ca_09043.1|Ca_LG_4:12555590-12556304|plus|	8.62883	2.26e-07	no	NA	NA	NA	12555590	12556304	+	Lipid transfer protein		IPR016140	PF14368			SSF47699	Non-specific_lipid-transfer_protein-like_protein_At2g13820	XM_004495128.1	#has_lipid_binding|#involved_in_lipid_transport|#located_in_plasma_membrane	cd00010-AAI_LTSS|cl07890-AAI_LTSS	--	--
Ca_03693	Ca_03693.1|Ca_LG_2:10163458-10165043|plus|	7.81842	3.72e-07	no	NA	NA	NA	10163458	10165043	+	glycerol-3-phosphate acyltransferase 5	PTHR31347 PTHR31347	IPR002123	PF01553	GO:0008152 GO:0016746		SSF69593	Glycerol-3-phosphate_acyltransferase_7	XM_004490820.1	#has_transferase_activity,_transferring_acyl_groups|#involved_in_metabolic_process	PLN02499-PLN02499|cd06551-LPLAT|cl17185-LPLAT	--	--
Ca_03451	Ca_03451.1|Ca_LG_2:6869525-6870330|minus|	-2.99787	6.12e-07	no	NA	NA	NA	6869525	6870330	-	DUF679 domain membrane protein 1	PTHR31621 PTHR31621	IPR007770	PF05078				--	XM_004491067.1	--	cl04923-DUF679	--	--
Ca_12958	Ca_12958.1|Ca_LG_5:20313987-20319098|minus|	6.82648	6.12e-07	no	NA	NA	NA	20313987	20319098	-	GDSL-like Lipase/Acylhydrolase superfamily protein	PTHR22835	IPR001087 IPR013831	PF00657	GO:0006629 GO:0016787 GO:0016788		SSF52266	GDSL_esterase/lipase_At1g74460	XM_004514899.1	#has_hydrolase_activity,_acting_on_ester_bonds|#involved_in_lipid_metabolic_process|#located_in_extracellular_region	cd01837-SGNH_plant_lipase_like|cl01053-SGNH_hydrolase	--	--
Ca_14156	Ca_14156.1|Ca_LG_5:35301696-35304429|plus|	-2.50347	6.12e-07	no	NA	NA	NA	35301696	35304429	+	Protein kinase superfamily protein	PTHR13902 PTHR13902	IPR000719 IPR002290 IPR008271 IPR011009	PF00069	GO:0004672 GO:0004674 GO:0005524 GO:0006468 GO:0016772	PS00108 PS50011	SSF56112	Probable_serine/threonine-protein_kinase_WNK6	XM_004502853.1	#has_ATP_binding|#has_protein_kinase_activity|#has_protein_serine/threonine_kinase_activity|#has_transferase_activity,_transferring_phosphorus-containing_groups|#involved_in_protein_phosphorylation|#located_in_plasma_membrane	cd13983-STKc_WNK|cl21453-PKc_like|smart00220-S_TKc	--	--
Ca_03428	Ca_03428.1|Ca_LG_2:6571749-6575188|minus|	6.18798	1.04e-06	no	NA	NA	NA	6571749	6575188	-	laccase 5	PTHR11709 PTHR11709	IPR001117 IPR002355 IPR008972 IPR011706 IPR011707 IPR017761	PF00394 PF07731 PF07732	GO:0005507 GO:0016491 GO:0046274 GO:0048046 GO:0052716 GO:0055114	PS00079 PS00080	SSF49503	Laccase-4	XM_004490947.1	#has_copper_ion_binding|#has_hydroquinone:oxygen_oxidoreductase_activity|#has_oxidoreductase_activity|#involved_in_lignin_catabolic_process|#involved_in_oxidation-reduction_process|#located_in_apoplast|#located_in_extracellular_region	TIGR03389-laccase_11|cd13849-CuRO_1_LCC_plant|cd13875-CuRO_2_LCC_plant|cd13897-CuRO_3_LCC_plant|cl19115-Cupredoxin	--	--
Ca_07984	Ca_07984.1|Ca_LG_3:41816133-41817878|minus|	-4.71604	2.82e-06	no	NA	NA	NA	41816133	41817878	-	galactinol synthase 2	PTHR11183	IPR002495	PF01501	GO:0016757		SSF53448	Galactinol_synthase_1_	XM_004494468.1	--	COG1442-RfaJ|cd02537-GT8_Glycogenin|cl11394-Glyco_tranf_GTA_type	--	--
Ca_21651	Ca_21651.1|Ca_LG_7:40062903-40064818|plus|	8.29239	3.82e-06	no	NA	NA	NA	40062903	40064818	+	Peroxidase superfamily protein	PTHR31235 PTHR31235	IPR000823 IPR002016 IPR010255 IPR019793 IPR019794	PF00141	GO:0004601 GO:0006979 GO:0020037 GO:0055114	PS00435 PS00436 PS50873	SSF48113	Peroxidase_25	XM_004508445.1	#has_heme_binding|#has_peroxidase_activity|#located_in_extracellular_region	cd00693-secretory_peroxidase|cl00196-plant_peroxidase_like	--	--
Ca_17311	Ca_17311.1|Ca_LG_6:24669065-24669628|plus|	5.88121	7.21e-06	no	NA	NA	NA	24669065	24669628	+	Disease resistance-responsive (dirigent-like protein) family protein	PTHR21495 PTHR21495	IPR004265	PF03018				Dirigent_protein_23_	XM_004505713.1	--	cl03841-Dirigent	--	--
Ca_08614	Ca_08614.1|Ca_LG_4:7615538-7626824|plus|	4.53049	7.3e-06	no	NA	NA	NA	7615538	7626824	+	phosphate transporter PHO1-like isoform X1 [Glycine max]	PTHR10783 PTHR10783	IPR004331 IPR004342	PF03105 PF03124	GO:0016021	PS51380 PS51382		Phosphate_transporter_PHO1_homolog_1	XM_004495298.1	#located_in_integral_to_membrane|#located_in_plasma_membrane	cd14476-SPX_PHO1_like|cl03905-EXS|cl21499-SPX	--	--
Ca_17017	Ca_17017.1|Ca_LG_6:21293829-21295340|plus|	-5.12166	7.52e-06	no	NA	NA	NA	21293829	21295340	+	Cysteine proteinases superfamily protein	PTHR12411 PTHR12411	IPR000169 IPR000668 IPR013128 IPR013201 IPR025660 IPR025661	PF00112 PF08246	GO:0006508 GO:0008234	PS00139 PS00639 PS00640	SSF54001	KDEL-tailed_cysteine_endopeptidase_CEP1	XM_004505401.1	#has_cysteine-type_peptidase_activity|#involved_in_proteolysis|#located_in_extracellular_region	cd02248-Peptidase_C1A|cl00296-Peptidase_C1|cl22448-Inhibitor_I29|smart00848-Inhibitor_I29	--	--
Ca_14542	Ca_14542.1|Ca_LG_5:38917112-38920674|plus|	7.36152	8.76e-06	no	NA	NA	NA	38917112	38920674	+	nodulin MtN21 /EamA-like transporter family protein	PTHR31218 PTHR31218	IPR000620	PF00892	GO:0016020		SSF10348	Protein_WALLS_ARE_THIN_1	XM_004500909.1	#located_in_membrane	COG0697-RhaT|cl00910-EamA	--	--
Ca_16646	Ca_16646.1|Ca_LG_6:16736713-16737591|minus|	7.26502	1.09e-05	no	NA	NA	NA	16736713	16737591	-	protein E6-like isoform X1 [Glycine max]							Protein_E6	XM_004505037.1	#located_in_extracellular_region	--	--	--
Ca_25349	Ca_25349.1|scaffold03074:21515-24984|minus|	-2.07259	1.19e-05	no	NA	NA	NA	21515	24984	-	haloacid dehalogenase-like hydrolase	PTHR12725 PTHR12725	IPR006439 IPR010237 IPR023214	PF13242 PF13419	GO:0008152 GO:0016787		SSF56784	Uncharacterized_protein_C24B11.05	XM_004514074.1	#has_catalytic_activity|#has_hydrolase_activity|#involved_in_metabolic_process	TIGR01509-HAD-SF-IA-v3|cd01427-HAD_like|cl21460-HAD_like	--	--
Ca_01732	Ca_01732.1|Ca_LG_1:27113577-27115760|plus|	-4.87578	1.42e-05	no	NA	NA	NA	27113577	27115760	+	Plant protein of unknown function (DUF946)	PTHR17204 PTHR17204	IPR009291	PF06101				--	XM_004488494.1	#located_in_chloroplast	cl05569-DUF946	--	--
Ca_14743	Ca_14743.1|Ca_LG_5:40998490-41007171|minus|	-3.46002	1.42e-05	no	NA	NA	NA	40998490	41007171	-	zinc finger protein-related	PTHR21319	IPR001841 IPR004039 IPR007527 IPR008913 IPR013083 IPR017921	PF05495 PF14599	GO:0005515 GO:0008270	PS50089 PS50966 PS51266 PS51270	SSF16121 SSF16124 SSF57850	RING_finger_and_CHY_zinc_finger_domain-containing_protein_1	XM_004501215.1	#has_zinc_ion_binding|#located_in_nucleus	cd00162-RING|cl17238-RING|cl19861-zf-CHY|cl20581-zinc_ribbon_6	--	--
Ca_14997	Ca_14997.1|Ca_LG_5:43680963-43682337|plus|	-2.36857	1.42e-05	no	NA	NA	NA	43680963	43682337	+	Lipoyl(Octanoyl) transferase isoform 2 n=1 Tax=Galdieria sulphuraria RepID=M2W3J2_GALSU	PTHR10993 PTHR10993	IPR000544 IPR004143 IPR020605	PF03099	GO:0003824 GO:0005737 GO:0006464 GO:0009107 GO:0016415	PS01313	SSF55681	Plastidial_lipoyltransferase_2	XM_004500990.1	#has_catalytic_activity|#has_octanoyltransferase_activity|#involved_in_cellular_protein_modification_process|#involved_in_lipoate_biosynthetic_process|#located_in_chloroplast|#located_in_cytoplasm	cl14057-BPL_LplA_LipB	ERF	--
Ca_03177	Ca_03177.1|Ca_LG_2:3403924-3405527|plus|	5.52561	1.91e-05	no	NA	NA	NA	3403924	3405527	+	light-harvesting chlorophyll B-binding protein 3	PTHR21649 PTHR21649	IPR001344 IPR022796 IPR023329	PF00504	GO:0009765 GO:0016020		SSF10351	Chlorophyll_a-b_binding_protein,_chloroplastic	XM_004491518.1	#involved_in_photosynthesis,_light_harvesting|#located_in_chloroplast|#located_in_chloroplast_envelope|#located_in_chloroplast_thylakoid_membrane|#located_in_membrane|#located_in_thylakoid	PLN00025-PLN00025|cl02879-Chloroa_b-bind	--	--
Ca_22542	Ca_22542.1|Ca_LG_8:4825864-4827962|minus|	2.43192	1.91e-05	no	NA	NA	NA	4825864	4827962	-	plasma membrane intrinsic protein 1	PTHR19139 PTHR19139	IPR000425 IPR022357 IPR023271	PF00230	GO:0005215 GO:0006810 GO:0016020	PS00221	SSF81338	Probable_aquaporin_PIP1-5	XM_004511510.1	#has_transporter_activity|#involved_in_transmembrane_transport|#involved_in_transport|#involved_in_water_transport|#located_in_integral_to_membrane|#located_in_membrane|#located_in_plasma_membrane|#located_in_plasmodesma	cd00333-MIP|cl00200-MIP	--	--
Ca_07084	Ca_07084.1|Ca_LG_3:33588105-33589987|minus|	4.68445	2.21e-05	no	NA	NA	NA	33588105	33589987	-	3-ketoacyl-CoA synthase 1	PTHR31561	IPR012392 IPR013601 IPR013747 IPR016038 IPR016039	PF08392 PF08541	GO:0003824 GO:0006633 GO:0008152 GO:0008610 GO:0016020 GO:0016747		SSF53901	Probable_3-ketoacyl-CoA_synthase_14	XM_004494800.1	#has_catalytic_activity|#has_transferase_activity,_transferring_acyl_groups_other_than_amino-acyl_groups|#involved_in_fatty_acid_biosynthetic_process|#involved_in_lipid_biosynthetic_process|#involved_in_metabolic_process|#located_in_extracellular_region|#located_in_membrane	PLN02854-PLN02854|cd00831-CHS_like|cl09938-cond_enzymes	--	--
Ca_11452	Ca_11452.1|Ca_LG_4:46805558-46807037|minus|	-2.24716	3.57e-05	no	NA	NA	NA	46805558	46807037	-	UDP-Glycosyltransferase superfamily protein	PTHR11926 PTHR11926	IPR002213	PF00201	GO:0008152 GO:0016758	PS00375	SSF53756	Zeatin_O-xylosyltransferase	KF018251.1	#has_transferase_activity,_transferring_hexosyl_groups|#involved_in_metabolic_process	PLN02863-PLN02863|cl21512-Glycos_transf_1	--	--
Ca_24986	Ca_24986.1|scaffold02477:54138-61043|minus|	-3.29017	3.57e-05	no	NA	NA	NA	54138	61043	-	Transport membrane protein n=3 Tax=Papilionoideae RepID=G7I9P9_MEDTR							Uncharacterized_tatC-like_protein_ymf16	AC144406.17	#located_in_plasma_membrane	cl00521-TatC	--	--
Ca_10105	Ca_10105.1|Ca_LG_4:26005468-26008276|plus|	5.37742	4.7e-05	no	NA	NA	NA	26005468	26008276	+	O-methyltransferase 1	PTHR11746 PTHR11746	IPR001077 IPR011991 IPR012967 IPR016461	PF00891 PF08100	GO:0008168 GO:0008171 GO:0046983	PS51588	SSF46785 SSF53335	Isoliquiritigenin_2'-O-methyltransferase	XM_004496304.1	#located_in_plasma_membrane|#located_in_plasmodesma	cd02440-AdoMet_MTases|cl06920-Dimerization|cl17173-AdoMet_MTases	--	--
Ca_17021	Ca_17021.1|Ca_LG_6:21316073-21317192|minus|	-3.46459	5.88e-05	no	NA	NA	NA	21316073	21317192	-	uncharacterized protein LOC100800312 [Glycine max]		IPR012881	PF07939				--	XM_003607573.1	#located_in_nucleus	cl06811-DUF1685	--	--
Ca_05086	Ca_05086.1|Ca_LG_3:580755-581377|minus|	-4.60138	6.59e-05	no	NA	NA	NA	580755	581377	-	blue copper protein-like [Glycine max]		IPR003245 IPR008972	PF02298	GO:0005507 GO:0009055	PS51485	SSF49503	Mavicyanin	XM_004493135.1	#has_copper_ion_binding|#has_electron_carrier_activity|#located_in_plasma_membrane	cd04216-Phytocyanin|cl19115-Cupredoxin	--	--
Ca_04420	Ca_04420.1|Ca_LG_2:24631511-24632005|minus|	-5.4065	6.77e-05	no	NA	NA	NA	24631511	24632005	-	Disease resistance protein (TIR-NBS-LRR class) family	PTHR11017 PTHR11017	IPR000157	PF01582	GO:0005515 GO:0007165	PS50104	SSF52200	TMV_resistance_protein_N	CR954189.3	#involved_in_signal_transduction|#located_in_cytoplasm|#located_in_intracellular	cl22462-TIR	--	TIR
Ca_12860	Ca_12860.1|Ca_LG_5:18496805-18503201|minus|	4.2144	6.77e-05	no	NA	NA	NA	18496805	18503201	-	Oxidoreductase molybdopterin binding domain containing protein n=4 Tax=Coccidioides RepID=C5PJ79_COCP7	PTHR19370 PTHR19370	IPR000572 IPR001199 IPR001433 IPR001709 IPR001834 IPR005066 IPR008333 IPR008335 IPR012137 IPR014756 IPR017927 IPR017938 IPR018506 IPR022407					Nitrate_reductase_[NADPH]	XM_004513774.1	#has_electron_carrier_activity|#has_flavin_adenine_dinucleotide_binding|#has_heme_binding|#has_iron_ion_binding|#has_metal_ion_binding|#has_molybdenum_ion_binding|#has_molybdopterin_cofactor_binding|#has_oxidoreductase_activity|#has_oxidoreductase_activity,_acting_on_other_nitrogenous_compounds_as_donors,_with_NAD_or_NADP_as_acceptor|#involved_in_nitrate_assimilation|#involved_in_oxidation-reduct…	PLN02252-PLN02252|cd02112-eukary_NR_Moco|cd06183-cyt_b5_reduct_like|cl00199-SO_family_Moco|cl02041-Cyt-b5|cl06868-FNR_like	--	--
Ca_13428	Ca_13428.1|Ca_LG_5:27558120-27563290|minus|	-2.72442	7.75e-05	no	NA	NA	NA	27558120	27563290	-	C2 and GRAM domain-containing protein At1g03370-like isoform X2 [Glycine max]	PTHR16122 PTHR16122	IPR000008	PF00168	GO:0005515	PS50004	SSF49562	C2_and_GRAM_domain-containing_protein_At1g03370	XM_004501818.1	#located_in_nucleus	cd00030-C2|cl14603-C2|cl17171-PH-like	--	--
Ca_27918	Ca_27918.1|scaffold11664:1578-2225|minus|	-6.56022	8.44e-05	no	NA	NA	NA	1578	2225	-	Cytochrome P450 superfamily protein	PTHR24298 PTHR24298	IPR001128 IPR002401 IPR017972	PF00067	GO:0005506 GO:0016705 GO:0020037 GO:0055114	PS00086	SSF48264	Cytochrome_P450_84A1	XM_004509275.1	#has_electron_carrier_activity|#has_heme_binding|#has_iron_ion_binding|#has_oxidoreductase_activity,_acting_on_paired_donors,_with_incorporation_or_reduction_of_molecular_oxygen|#involved_in_oxidation-reduction_process	cl12078-p450	--	--
Ca_06866	Ca_06866.1|Ca_LG_3:31164052-31166713|minus|	4.69816	9.53e-05	no	NA	NA	NA	31164052	31166713	-	nodulin MtN21 /EamA-like transporter family protein	PTHR31218 PTHR31218	IPR000620	PF00892	GO:0016020		SSF10348	WAT1-related_protein_At5g07050	XM_004493270.1	#located_in_chloroplast|#located_in_membrane	COG0697-RhaT|cl00910-EamA	--	--
Ca_12908	Ca_12908.1|Ca_LG_5:19384900-19386861|plus|	7.70584	9.59e-05	no	NA	NA	NA	19384900	19386861	+	ATP-binding ABC transporter	PTHR19241 PTHR19241	IPR003439 IPR003593 IPR013525 IPR017871 IPR027417	PF00005 PF01061	GO:0000166 GO:0005524 GO:0016020 GO:0016887 GO:0017111	PS00211 PS50893	SSF52540	ABC_transporter_G_family_member_23	XM_004513897.1	#has_ATP_binding|#has_ATPase_activity|#has_nucleoside-triphosphatase_activity|#has_nucleotide_binding|#located_in_membrane|#located_in_plasma_membrane	TIGR00955-Protein_white|cl05760-PDR_CDR|cl21455-ABC_ATPase|cl21474-ABC2_membrane	--	--
Ca_11191	Ca_11191.1|Ca_LG_4:41165727-41168336|plus|	4.19907	0.000107678	no	NA	NA	NA	41165727	41168336	+	ATP-binding ABC transporter	PTHR19241 PTHR19241	IPR003439 IPR003593 IPR013525 IPR017871 IPR027417	PF00005 PF01061	GO:0000166 GO:0005524 GO:0016020 GO:0016887 GO:0017111	PS00211 PS50893	SSF52540	ABC_transporter_G_family_member_17	XM_004497274.1	#has_ATP_binding|#has_ATPase_activity|#has_nucleoside-triphosphatase_activity|#has_nucleotide_binding|#located_in_membrane	TIGR00955-Protein_white|cl21455-ABC_ATPase|cl21474-ABC2_membrane	--	--
Ca_23349	Ca_23349.1|Ca_LG_8:14460443-14467806|plus|	5.16978	0.000111698	no	NA	NA	NA	14460443	14467806	+	Signal transduction histidine kinase	PTHR24423	IPR001789 IPR003594 IPR003661 IPR004358 IPR005467 IPR009082 IPR011006	PF00072 PF00512 PF02518		PS50109 PS50110	SSF47384 SSF52172 SSF55874	Histidine_kinase_1	XM_004512093.1	#has_ATP_binding|#has_phosphorelay_response_regulator_activity|#has_phosphorelay_sensor_kinase_activity|#has_protein_histidine_kinase_activity|#has_signal_transducer_activity|#has_transferase_activity,_transferring_phosphorus-containing_groups|#located_in_membrane|#located_in_plasma_membrane	PRK11107-PRK11107|cd00075-HATPase_c|cd00082-HisKA|cd00156-REC|cl00075-HATPase_c|cl00080-HisKA|cl19078-REC	--	--
Ca_10611	Ca_10611.1|Ca_LG_4:31739567-31747095|plus|	3.70065	0.000113525	no	NA	NA	NA	31739567	31747095	+	ACT domain repeat 3	PTHR31096 PTHR31096	IPR002912	PF01842	GO:0008152 GO:0016597	PS51671	SSF55021	Bifunctional_uridylyltransferase/uridylyl-removing_enzyme	XM_004498309.1	#has_[protein-PII]_uridylyltransferase_activity|#has_amino_acid_binding|#involved_in_metabolic_process|#involved_in_nitrogen_compound_metabolic_process	cd04895-ACT_ACR_1|cd04897-ACT_ACR_3|cl09141-ACT	--	--
Ca_04498	Ca_04498.1|Ca_LG_2:25906545-25908990|minus|	7.71434	0.000120162	no	NA	NA	NA	25906545	25908990	-	transcription factor EMB1444-like [Glycine max]	PTHR13902 PTHR13902	IPR025610	PF14215				Transcription_factor_EMB1444	XM_004489807.1	#located_in_extracellular_region	cl16716-bHLH-MYC_N	--	--
Ca_07320	Ca_07320.1|Ca_LG_3:35690221-35691471|minus|	-3.95026	0.000125694	no	NA	NA	NA	35690221	35691471	-	auxin response factor 11	PTHR31734 PTHR31734	IPR003311 IPR011525	PF02309	GO:0005634 GO:0006355 GO:0046983	PS50962	SSF54277	Auxin-induced_protein_22E	XM_004493681.1	#has_protein_dimerization_activity|#involved_in_regulation_of_transcription,_DNA-dependent|#located_in_nucleus	cl03528-AUX_IAA	--	--
Ca_29307	Ca_29307.1|scaffold19019:2888-3280|plus|	5.61668	0.000127973	no	NA	NA	NA	2888	3280	+	nodulin MtN21 /EamA-like transporter family protein	PTHR31218 PTHR31218						WAT1-related_protein_At4g08290	BT134787.1	#located_in_membrane	PLN00411-PLN00411	--	--
Ca_14499	Ca_14499.1|Ca_LG_5:38484568-38486312|minus|	-5.17237	0.00014426	no	NA	NA	NA	38484568	38486312	-	Cysteine proteinases superfamily protein	PTHR12411 PTHR12411	IPR000169 IPR000668 IPR013128 IPR013201 IPR025660 IPR025661	PF00112 PF08246	GO:0006508 GO:0008234	PS00139 PS00639 PS00640	SSF54001	Xylem_cysteine_proteinase_1	XM_004500774.1	#has_cysteine-type_peptidase_activity|#involved_in_proteolysis|#located_in_extracellular_region|#located_in_nucleus	cd02248-Peptidase_C1A|cl00296-Peptidase_C1|cl22448-Inhibitor_I29|smart00848-Inhibitor_I29	--	--
Ca_13298	Ca_13298.1|Ca_LG_5:26093635-26095805|minus|	7.46764	0.000156936	no	NA	NA	NA	26093635	26095805	-	trehalose-6-phosphate phosphatase	PTHR10788 PTHR10788	IPR003337 IPR006379 IPR023214	PF02358	GO:0003824 GO:0005992 GO:0008152		SSF56784	Probable_trehalose-phosphate_phosphatase_J	XM_004500559.1	#has_catalytic_activity|#involved_in_metabolic_process|#involved_in_response_to_cadmium_ion|#involved_in_trehalose_biosynthetic_process|#located_in_cytoplasm	PLN03017-PLN03017|cl21460-HAD_like	--	--
Ca_10148	Ca_10148.1|Ca_LG_4:26457224-26458204|plus|	4.45593	0.000177635	no	NA	NA	NA	26457224	26458204	+	probable membrane-associated kinase regulator 5-like [Glycine max]							Probable_membrane-associated_kinase_regulator_5	XM_004496455.1	#located_in_nucleus	--	--	--
Ca_22354	Ca_22354.1|Ca_LG_8:2206245-2207178|minus|	6.80772	0.000177635	no	NA	NA	NA	2206245	2207178	-	vacuolar iron transporter homolog 2-like [Glycine max]	PTHR31812 PTHR31812	IPR008217	PF01988				Vacuolar_iron_transporter_homolog_4_	XM_004516589.1	--	cd02436-Nodulin-21|cl00278-CCC1_like	--	--
Ca_16390	Ca_16390.1|Ca_LG_6:13917052-13919076|plus|	-2.19096	0.000201747	no	NA	NA	NA	13917052	13919076	+	probable 2-oxoglutarate/Fe(II)-dependent dioxygenase-like [Glycine max]	PTHR10209 PTHR10209	IPR005123 IPR026992 IPR027443	PF03171 PF14226	GO:0016491 GO:0016706 GO:0055114	PS51471	SSF51197	Protein_SRG1	XM_004504546.1	#has_oxidoreductase_activity|#has_oxidoreductase_activity,_acting_on_paired_donors,_with_incorporation_or_reduction_of_molecular_oxygen,_2-oxoglutarate_as_one_donor,_and_incorporation_of_one_atom_each_of_oxygen_into_both_donors|#involved_in_oxidation-reduction_process|#located_in_cytoplasm	PLN02216-PLN02216|cl21496-2OG-FeII_Oxy|cl21672-DIOX_N	--	--
Ca_08412	Ca_08412.1|Ca_LG_4:5152924-5154086|plus|	3.44924	0.000210927	no	NA	NA	NA	5152924	5154086	+	Kelch repeat-containing F-box family protein		IPR001810 IPR015915	PF00646	GO:0005515		SSF11728	F-box/kelch-repeat_protein_At1g23390	XM_004489763.1	#located_in_nucleus	cl02535-F-box|cl02701-Kelch_3	--	--
Ca_03093	Ca_03093.1|Ca_LG_2:2699759-2704913|minus|	-2.12394	0.000212703	no	NA	NA	NA	2699759	2704913	-	actin-binding calponin-like (CH) domain protein	PTHR19961 PTHR19961	IPR001589 IPR001715 IPR011992	PF00307	GO:0003779 GO:0005509 GO:0005515	PS00020 PS50021	SSF47473 SSF47576	Putative_fimbrin-like_protein_3	XM_004491389.1	#has_actin_binding|#located_in_cytoplasm	COG5069-SAC6|cd00014-CH|cl00030-CH	--	--
Ca_10904	Ca_10904.1|Ca_LG_4:35726039-35732445|plus|	2.54419	0.000267902	no	NA	NA	NA	35726039	35732445	+	pollen protein Ole E I-like protein		IPR006041	PF01190				--	XM_004498664.1	--	cl03128-Pollen_Ole_e_I	--	--
Ca_07991	Ca_07991.1|Ca_LG_3:41871535-41874751|minus|	-2.6877	0.000272175	no	NA	NA	NA	41871535	41874751	-	Calmodulin-binding protein	PTHR31713 PTHR31713	IPR012416	PF07887				--	XM_004494478.1	#located_in_nucleus	cl06775-Calmodulin_bind	--	--
Ca_05456	Ca_05456.1|Ca_LG_3:6606628-6608929|plus|	3.53391	0.000327817	no	NA	NA	NA	6606628	6608929	+	1-aminocyclopropane-1-carboxylate oxidase homolog 1 [Glycine max]	PTHR10209 PTHR10209	IPR005123 IPR026992 IPR027443	PF03171 PF14226	GO:0016491 GO:0016706 GO:0055114	PS51471	SSF51197	1-aminocyclopropane-1-carboxylate_oxidase_homolog_1	XM_004513466.1	#has_oxidoreductase_activity|#has_oxidoreductase_activity,_acting_on_paired_donors,_with_incorporation_or_reduction_of_molecular_oxygen,_2-oxoglutarate_as_one_donor,_and_incorporation_of_one_atom_each_of_oxygen_into_both_donors|#involved_in_oxidation-reduction_process|#located_in_cytoplasm	PLN02912-PLN02912|cl21496-2OG-FeII_Oxy|cl21672-DIOX_N	--	--
Ca_11922	Ca_11922.1|Ca_LG_5:549985-551438|minus|	3.31326	0.000327817	no	NA	NA	NA	549985	551438	-	UDP-Glycosyltransferase superfamily protein	PTHR11926 PTHR11926	IPR002213	PF00201	GO:0008152 GO:0016758	PS00375	SSF53756	Isoflavone_7-O-glucosyltransferase_1	KF039764.1	#has_transferase_activity,_transferring_hexosyl_groups|#involved_in_metabolic_process|#located_in_cytosol	PLN02992-PLN02992|cl21512-Glycos_transf_1	--	--
Ca_08757	Ca_08757.1|Ca_LG_4:9207286-9209542|minus|	-3.55972	0.000329772	no	NA	NA	NA	9207286	9209542	-	Erythronate-4-phosphate dehydrogenase family protein	PTHR10996 PTHR10996						Uncharacterized_protein_At1g01500	XM_004499091.1	#located_in_mitochondrion	--	--	--
Ca_14449	Ca_14449.1|Ca_LG_5:38010539-38015773|minus|	7.50896	0.000329772	no	NA	NA	NA	38010539	38015773	-	endoglucanase 24-like [Glycine max]	PTHR22298 PTHR22298	IPR001701 IPR008928 IPR012341 IPR018221	PF00759	GO:0003824 GO:0004553 GO:0005975	PS00592 PS00698	SSF48208	Endoglucanase_3	XM_004500709.1	#has_catalytic_activity|#has_hydrolase_activity,_hydrolyzing_O-glycosyl_compounds|#involved_in_carbohydrate_metabolic_process|#located_in_extracellular_region	cl02959-Glyco_hydro_9	--	--
Ca_04565	Ca_04565.1|Ca_LG_2:26763087-26765153|minus|	-3.21183	0.000344284	no	NA	NA	NA	26763087	26765153	-	U-box domain-containing protein 19-like [Glycine max]	PTHR22904 PTHR22904	IPR000225 IPR003613 IPR011989 IPR013083 IPR016024	PF00514 PF04564 PF05536	GO:0000151 GO:0004842 GO:0005488 GO:0005515 GO:0016567	PS50176	SSF48371 SSF57850	U-box_domain-containing_protein_19	XM_004489798.1	#has_ubiquitin-protein_ligase_activity|#has_zinc_ion_binding|#involved_in_protein_ubiquitination|#located_in_nucleus|#located_in_ubiquitin_ligase_complex	cd00020-ARM|cl17238-RING|cl22454-ARM|smart00504-Ubox	--	--
Ca_02563	Ca_02563.1|Ca_LG_1:36946155-36950026|plus|	-2.07288	0.000357698	no	NA	NA	NA	36946155	36950026	+	DNA methyltransferase-2	PTHR10629	IPR001525	PF00145	GO:0003677 GO:0006306 GO:0008168		SSF53335	tRNA_(cytosine-5-)-methyltransferase	XM_004485539.1	#has_DNA_binding|#involved_in_DNA_methylation|#located_in_nucleus	cl17173-AdoMet_MTases	--	--
Ca_21895	Ca_21895.1|Ca_LG_7:42455403-42457550|plus|	7.46609	0.000435191	no	NA	NA	NA	42455403	42457550	+	Pollen Ole e 1 allergen and extensin family protein		IPR006041	PF01190				--	XM_004507537.1	#located_in_extracellular_region	cl03128-Pollen_Ole_e_I	--	--
Ca_26653	Ca_26653.1|scaffold05503:8345-10148|plus|	4.27223	0.000435191	no	NA	NA	NA	8345	10148	+	glyoxal oxidase-related protein	PTHR32208 PTHR32208	IPR009880 IPR011043 IPR013783 IPR014756 IPR015202 IPR015916	PF07250 PF09118			SSF50965 SSF81296	Galactose_oxidase	XM_004500897.1	#located_in_extracellular_region	cd02851-E_set_GO_C|cl09101-E_set	--	--
Ca_20612	Ca_20612.1|Ca_LG_7:28307546-28308406|plus|	-7.77224	0.000466692	no	NA	NA	NA	28307546	28308406	+	Cytochrome P450 superfamily protein	PTHR24298 PTHR24298	IPR001128	PF00067	GO:0005506 GO:0016705 GO:0020037 GO:0055114		SSF48264	Cytochrome_P450_84A1	XM_004509275.1	#has_electron_carrier_activity|#has_heme_binding|#has_iron_ion_binding|#has_oxidoreductase_activity,_acting_on_paired_donors,_with_incorporation_or_reduction_of_molecular_oxygen|#involved_in_oxidation-reduction_process	cl12078-p450	--	--
Ca_26757	Ca_26757.1|scaffold05757:12-9976|minus|	-2.87976	0.000468701	no	NA	NA	NA	12	9976	-	NADH dehydrogenase 2A chrM:79740-81297 REVERSE							NADH-ubiquinone_oxidoreductase_chain_2	XM_004512757.1	#has_NADH_dehydrogenase_(ubiquinone)_activity|#involved_in_ATP_synthesis_coupled_electron_transport|#involved_in_oxidation-reduction_process|#located_in_chloroplast	TIGR01770-NADH-quinone_oxidoreductase_subunit_N	--	--
Ca_14893	Ca_14893.1|Ca_LG_5:42560359-42566471|minus|	-2.0504	0.000476682	no	NA	NA	NA	42560359	42566471	-	DNA-directed RNA polymerase		IPR015801 IPR021602	PF11523	GO:0005507 GO:0009308 GO:0048038			Protein_DCL,_chloroplastic	XM_004501507.1	#located_in_chloroplast	cl13039-DUF3223	--	--
Ca_20310	Ca_20310.1|Ca_LG_7:23708259-23709608|minus|	-2.19964	0.000535208	no	NA	NA	NA	23708259	23709608	-	Fatty acid/sphingolipid desaturase	PTHR19353 PTHR19353	IPR001199 IPR005804 IPR012171	PF00173 PF00487	GO:0005506 GO:0006629 GO:0006633 GO:0016717 GO:0020037 GO:0055114	PS50255	SSF55856	Delta(8)-fatty-acid_desaturase	XM_004511159.1	#has_heme_binding|#has_iron_ion_binding|#has_oxidoreductase_activity,_acting_on_paired_donors,_with_oxidation_of_a_pair_of_donors_resulting_in_the_reduction_of_molecular_oxygen_to_two_molecules_of_water|#involved_in_fatty_acid_biosynthetic_process|#involved_in_lipid_metabolic_process|#involved_in_oxidation-reduction_process|#located_in_cytoplasm	cd03506-Delta6-FADS-like|cl00615-Membrane-FADS-like|cl02041-Cyt-b5	--	--
Ca_28013	Ca_28013.1|scaffold12504:158-761|plus|	-5.15204	0.000568766	no	NA	NA	NA	158	761	+	hypothetical protein							Uncharacterized_mitochondrial_protein_AtMg00030	KC189947.1	#located_in_mitochondrion	--	--	--
Ca_10509	Ca_10509.1|Ca_LG_4:30634024-30635693|plus|	3.31076	0.00057287	no	NA	NA	NA	30634024	30635693	+	cysteine-rich receptor-like protein kinase 25-like [Glycine max]	PTHR32099 PTHR32099	IPR002902	PF01657		PS51473		Cysteine-rich_receptor-like_protein_kinase_25	XM_004496734.1	#has_ATP_binding|#has_protein_kinase_activity|#has_protein_serine/threonine_kinase_activity|#has_transferase_activity,_transferring_phosphorus-containing_groups|#involved_in_protein_phosphorylation|#located_in_extracellular_region	cl03296-Stress-antifung	--	--
Ca_19383	Ca_19383.1|Ca_LG_7:5845952-5848427|minus|	-2.00507	0.000591419	no	NA	NA	NA	5845952	5848427	-	plant intracellular Ras-group-related LRR protein 4-like [Glycine max]	PTHR23155 PTHR23155	IPR001611 IPR003591	PF00560	GO:0005515	PS51450	SSF52058	Plant_intracellular_Ras-group-related_LRR_protein_4	XM_004509409.1	#located_in_nucleus|#located_in_plasma_membrane	--	--	--
Ca_01300	Ca_01300.1|Ca_LG_1:17897933-17898745|minus|	7.11824	0.00060747	no	NA	NA	NA	17897933	17898745	-	protein MIZU-KUSSEI 1-like [Glycine max]	PTHR31696 PTHR31696	IPR006460	PF04759				Protein_MIZU-KUSSEI_1	XM_004488471.1	#located_in_plasmodesma	cl04729-DUF617	--	--
Ca_12747	Ca_12747.1|Ca_LG_5:15747393-15756430|plus|	2.4098	0.00062367	no	NA	NA	NA	15747393	15756430	+	ankyrin repeat-containing protein At5g02620-like isoform X2 [Glycine max]		IPR002110 IPR020683 IPR026961	PF12796 PF13962	GO:0005515	PS50088 PS50297	SSF48403	--	XM_004514957.1	--	cd00204-ANK|cl02529-ANK|cl16503-PGG	--	--
Ca_03347	Ca_03347.1|Ca_LG_2:5253767-5254607|plus|	-3.11521	0.000662147	no	NA	NA	NA	5253767	5254607	+	17.8 kDa class I heat shock protein-like [Glycine max]	PTHR11527 PTHR11527	IPR002068 IPR008978	PF00011		PS01031	SSF49764	23.2_kDa_heat_shock_protein	XM_004491097.1	#located_in_cytoplasm	COG0071-IbpA|cd06464-ACD_sHsps-like|cl00175-alpha-crystallin-Hsps_p23-like	--	--
Ca_03098	Ca_03098.1|Ca_LG_2:2738292-2742111|plus|	-3.34174	0.000717919	no	NA	NA	NA	2738292	2742111	+	pirin	PTHR13903 PTHR13903	IPR003829 IPR008778 IPR011051 IPR012093 IPR014710	PF02678 PF05726			SSF51182	Pirin-like_protein	XM_004491395.1	#located_in_nucleus	COG1741-COG1741|cl21464-ABD	--	--
Ca_09072	Ca_09072.1|Ca_LG_4:12832114-12832979|minus|	-3.48659	0.000722456	no	NA	NA	NA	12832114	12832979	-	AAA ATPase containing von Willebrand factor type A n=1 Tax=Medicago truncatula RepID=G8A041_MEDTR							--	XM_004495167.1	--	--	--	--
Ca_14901	Ca_14901.1|Ca_LG_5:42633054-42637647|minus|	-1.90032	0.000750986	no	NA	NA	NA	42633054	42637647	-	Protein phosphatase 2C family protein	PTHR13832 PTHR13832	IPR001932 IPR015655	PF00481	GO:0003824		SSF81606	Probable_protein_phosphatase_2C_15	XM_004501518.1	#has_catalytic_activity|#located_in_cytosol|#located_in_mitochondrion	cd00143-PP2Cc|cl00120-PP2Cc	--	--
Ca_22226	Ca_22226.1|Ca_LG_8:775295-777261|plus|	-2.17319	0.000781832	no	NA	NA	NA	775295	777261	+	12-oxophytodienoate reductase 2	PTHR22893 PTHR22893	IPR001155 IPR013785	PF00724	GO:0003824 GO:0010181 GO:0016491 GO:0055114		SSF51395	Putative_12-oxophytodienoate_reductase-like_protein_1	XM_004511330.1	#has_FMN_binding|#has_catalytic_activity|#has_oxidoreductase_activity|#involved_in_oxidation-reduction_process|#located_in_cytoplasm	COG1902-NemA|cd02933-OYE_like_FMN|cl21457-TIM_phosphate_binding	NAC	--
Ca_09042	Ca_09042.1|Ca_LG_4:12551113-12552758|minus|	7.21835	0.000896477	no	NA	NA	NA	12551113	12552758	-	c("Nutrient reservoir"		IPR006045 IPR011051 IPR014710	PF00190	GO:0045735		SSF51182	Sucrose-binding_protein	XM_004495127.1	#has_nutrient_reservoir_activity|#located_in_extracellular_region|#located_in_plant-type_cell_wall	cl21464-ABD|smart00835-Cupin_1	--	--
Ca_25658	Ca_25658.1|scaffold03540:5437-8577|plus|	6.48681	0.000896477	no	NA	NA	NA	5437	8577	+	c("HAD superfamily"	PTHR31284 PTHR31284	IPR005519 IPR010028 IPR014403 IPR023214	PF03767	GO:0003993		SSF56784	Acid_phosphatase_1	XM_004516256.1	#has_acid_phosphatase_activity	cl21460-HAD_like	--	--
Ca_10065	Ca_10065.1|Ca_LG_4:25453181-25454351|plus|	-2.07123	0.000931467	no	NA	NA	NA	25453181	25454351	+	Protein kinase family protein	PTHR24420	IPR000719 IPR002290 IPR008271 IPR011009 IPR013320 IPR017441	PF00069	GO:0004672 GO:0004674 GO:0005524 GO:0006468 GO:0016772	PS00107 PS00108 PS50011	SSF56112	Wall-associated_receptor_kinase_4	XM_004498387.1	#has_ATP_binding|#has_calcium_ion_binding|#has_protein_kinase_activity|#has_protein_serine/threonine_kinase_activity|#has_transferase_activity,_transferring_phosphorus-containing_groups|#involved_in_protein_phosphorylation|#located_in_extracellular_region	cd14066-STKc_IRAK|cl21453-PKc_like|smart00221-STYKc	--	--
Ca_02229	Ca_02229.1|Ca_LG_1:33757771-33758811|minus|	-1.97178	0.000957651	no	NA	NA	NA	33757771	33758811	-	c("F-box plant-like protein"	PTHR31478	IPR027949	PF14476				Probable_F-box_protein_At4g22030_	XM_004486114.1	--	cl20529-Chloroplast_duf	--	--
Ca_20002	Ca_20002.1|Ca_LG_7:17976175-17979979|plus|	-3.99001	0.00098249	no	NA	NA	NA	17976175	17979979	+	phosphoenolpyruvate carboxykinase 1	PTHR30031 PTHR30031	IPR001272 IPR008210 IPR013035 IPR015994	PF01293	GO:0004611 GO:0004612 GO:0005524 GO:0006094 GO:0017076	PS00532	SSF53795 SSF68923	Phosphoenolpyruvate_carboxykinase_[ATP]	XM_004509665.1	#has_ATP_binding|#has_phosphoenolpyruvate_carboxykinase_(ATP)_activity|#has_phosphoenolpyruvate_carboxykinase_activity|#has_purine_nucleotide_binding|#involved_in_gluconeogenesis|#located_in_cytoplasm	cl21455-ABC_ATPase	--	--
Ca_06578	Ca_06578.1|Ca_LG_3:27645903-27651272|minus|	3.12145	0.000996581	no	NA	NA	NA	27645903	27651272	-	sugar transport protein 1-like [Glycine max]	PTHR24063 PTHR24063	IPR003663 IPR004821 IPR005828 IPR005829 IPR014729 IPR016196 IPR020846	PF00083 PF01467	GO:0003824 GO:0005215 GO:0006810	PS00216 PS00217 PS50850	SSF10347 SSF52374	Sugar_carrier_protein_C	XM_004515631.1	#located_in_cytoplasm|#located_in_plasma_membrane|#located_in_plasmodesma|#located_in_vacuole	PLN02406-PLN02406|cd02174-CCT|cd06174-MFS|cl00015-nt_trans|cl21472-MFS	--	--
Ca_16426	Ca_16426.1|Ca_LG_6:14292145-14294320|minus|	5.62365	0.00107934	no	NA	NA	NA	14292145	14294320	-	Cytochrome P450 superfamily protein	PTHR24298	IPR001128 IPR002401 IPR017972	PF00067	GO:0005506 GO:0016705 GO:0020037 GO:0055114	PS00086	SSF48264	Cytochrome_P450_71A26	XM_004504973.1	#has_electron_carrier_activity|#has_heme_binding|#has_iron_ion_binding|#has_oxidoreductase_activity,_acting_on_paired_donors,_with_incorporation_or_reduction_of_molecular_oxygen|#involved_in_oxidation-reduction_process	cl12078-p450	--	--
Ca_24972	Ca_24972.1|scaffold02471:25631-34440|minus|	2.69898	0.00112846	no	NA	NA	NA	25631	34440	-	RNA-binding protein 24-A-like [Glycine max]	PTHR24011 PTHR24011	IPR000504 IPR012677	PF00076	GO:0000166 GO:0003676	PS50102	SSF54928	RNA-binding_protein_38	XM_004506309.1	#has_nucleic_acid_binding|#has_nucleotide_binding|#located_in_extracellular_region	cd12384-RRM_RBM24_RBM38_like|cl17169-RRM_SF	--	--
Ca_16261	Ca_16261.1|Ca_LG_6:12052737-12055181|minus|	6.3695	0.00117131	no	NA	NA	NA	12052737	12055181	-	c("thiamine thiazole synthase 2"	PTHR10617 PTHR10617	IPR002922 IPR027495	PF01946	GO:0006950 GO:0009228		SSF51905	Thiamine_thiazole_synthase_1,_chloroplastic	XM_004504285.1	#involved_in_thiamine_biosynthetic_process|#located_in_chloroplast|#located_in_chloroplast_envelope|#located_in_chloroplast_stroma|#located_in_thylakoid	PLN02661-PLN02661|cl21454-SDR	--	--
Ca_21815	Ca_21815.1|Ca_LG_7:41656809-41659345|plus|	-1.96292	0.00117131	no	NA	NA	NA	41656809	41659345	+	tetraspanin-8-like [Glycine max]	PTHR32191 PTHR32191	IPR018499 IPR018503	PF00335	GO:0016021	PS00421		Tetraspanin-8	XM_004507728.1	#located_in_Golgi_apparatus|#located_in_extracellular_region|#located_in_integral_to_membrane|#located_in_membrane|#located_in_plasma_membrane|#located_in_plasmodesma	cl01453-DUF1275	--	--
Ca_16663	Ca_16663.1|Ca_LG_6:16905597-16907575|minus|	2.58743	0.00120851	no	NA	NA	NA	16905597	16907575	-	FAD-binding Berberine family protein	PTHR32448 PTHR32448	IPR006094 IPR012951 IPR016166 IPR016167 IPR016169	PF01565 PF08031	GO:0003824 GO:0008762 GO:0016491 GO:0016614 GO:0050660 GO:0055114	PS51387	SSF56176	Tetrahydrocannabinolic_acid_synthase	XM_004504664.1	#has_UDP-N-acetylmuramate_dehydrogenase_activity|#has_catalytic_activity|#has_flavin_adenine_dinucleotide_binding|#has_oxidoreductase_activity|#has_oxidoreductase_activity,_acting_on_CH-OH_group_of_donors|#involved_in_oxidation-reduction_process|#located_in_cell_wall|#located_in_cytoplasm|#located_in_plasmodesma	COG0277-GlcD|cl06869-BBE|cl19922-FAD_binding_4	--	--
Ca_03763	Ca_03763.1|Ca_LG_2:11214054-11216850|minus|	7.37289	0.00124731	no	NA	NA	NA	11214054	11216850	-	laccase 3	PTHR11709 PTHR11709	IPR001117 IPR002355 IPR008972 IPR011706 IPR011707 IPR017761	PF00394 PF07731 PF07732	GO:0005507 GO:0016491 GO:0046274 GO:0048046 GO:0052716 GO:0055114	PS00079 PS00080	SSF49503	Putative_laccase-17	XM_004490604.1	#has_copper_ion_binding|#has_hydroquinone:oxygen_oxidoreductase_activity|#has_oxidoreductase_activity|#involved_in_lignin_catabolic_process|#involved_in_oxidation-reduction_process|#located_in_apoplast|#located_in_extracellular_region	cd13875-CuRO_2_LCC_plant|cd13897-CuRO_3_LCC_plant|cl19115-Cupredoxin	--	--
Ca_10044	Ca_10044.1|Ca_LG_4:25093283-25103342|minus|	2.6285	0.001297	no	NA	NA	NA	25093283	25103342	-	Transmembrane amino acid transporter family protein	PTHR32081 PTHR32081	IPR001948 IPR013057 IPR023358	PF01490 PF02127	GO:0004177 GO:0006508 GO:0008270		SSF10182 SSF53187	Probable_aspartyl_aminopeptidase	XM_004496141.1	#located_in_plasma_membrane	COG0814-SdaC|cd05658-M18_DAP|cl00456-SLC5-6-like_sbd|cl14876-Zinc_peptidase_like	--	--
Ca_10438	Ca_10438.1|Ca_LG_4:29995158-29996412|minus|	4.31023	0.0013055	no	NA	NA	NA	29995158	29996412	-	Bifunctional inhibitor/lipid-transfer protein/seed storage 2S albumin superfamily protein		IPR016140	PF14368			SSF47699	--	XM_004496649.1	#located_in_plasma_membrane	cd00010-AAI_LTSS|cl07890-AAI_LTSS|cl12385-SOG2	--	--
Ca_03334	Ca_03334.1|Ca_LG_2:5115143-5122615|plus|	2.18278	0.00141515	no	NA	NA	NA	5115143	5122615	+	nitrate transporter 1:2	PTHR11654 PTHR11654	IPR000109 IPR016196	PF00854	GO:0005215 GO:0006810 GO:0016020		SSF10347	Nitrate_transporter_1.2	XM_004489931.1	#located_in_plasma_membrane	cl21472-MFS	--	--
Ca_07089	Ca_07089.1|Ca_LG_3:33615202-33617601|minus|	-4.31556	0.00141515	no	NA	NA	NA	33615202	33617601	-	subtilisin-like serine protease 2	PTHR10795 PTHR10795	IPR000209 IPR003137 IPR010259 IPR015500 IPR023828	PF00082 PF02225 PF05922	GO:0004252 GO:0006508 GO:0042802 GO:0043086	PS00138	SSF52743	Subtilisin-like_protease_SDD1	XM_004494807.1	#has_identical_protein_binding|#has_serine-type_endopeptidase_activity|#involved_in_negative_regulation_of_catalytic_activity|#involved_in_proteolysis|#located_in_extracellular_region	cd04852-Peptidases_S8_3|cl05470-Inhibitor_I9|cl10459-Peptidases_S8_S53	--	--
Ca_16243	Ca_16243.1|Ca_LG_6:11913687-11916581|plus|	-2.77696	0.00151961	no	NA	NA	NA	11913687	11916581	+	calmodulin-binding family protein	PTHR31250 PTHR31250						--	XM_004504259.1	#located_in_nucleus	--	--	--
Ca_14886	Ca_14886.1|Ca_LG_5:42453127-42453396|plus|	-7.0368	0.00153619	no	NA	NA	NA	42453127	42453396	+	HXXXD-type acyl-transferase family protein	PTHR31896 PTHR31896	IPR003480 IPR023213	PF02458	GO:0016747			BAHD_acyltransferase_DCR	XM_003603024.1	#has_transferase_activity,_transferring_acyl_groups_other_than_amino-acyl_groups|#located_in_cytoplasm|#located_in_cytosol	cl19241-Condensation	--	--
Ca_18961	Ca_18961.1|Ca_LG_6:54205550-54207011|plus|	-2.65768	0.00153619	no	NA	NA	NA	54205550	54207011	+	c("calcium ion-binding protein"							--	XM_004515309.1	--	--	--	--
Ca_16544	Ca_16544.1|Ca_LG_6:15584337-15584678|minus|	4.91868	0.00179056	no	NA	NA	NA	15584337	15584678	-	leguminosin group485 secreted peptide							--	XM_004504782.1	--	TIGR04526-predic_Ig_block	--	--
Ca_13915	Ca_13915.1|Ca_LG_5:32729813-32731540|plus|	4.65469	0.00186932	no	NA	NA	NA	32729813	32731540	+	scarecrow-like transcription factor PAT1-like [Glycine max]	PTHR31636 PTHR31636	IPR005202	PF03514		PS50985		Scarecrow-like_protein_1	XM_004502515.1	#located_in_cytoplasm	cl15987-GRAS	GRAS	--
Ca_02623	Ca_02623.1|Ca_LG_1:37454350-37457081|plus|	4.60698	0.00191371	no	NA	NA	NA	37454350	37457081	+	Sulfite exporter TauE/SafE family protein	PTHR14255	IPR002781	PF01925	GO:0016021			--	XM_004485603.1	#located_in_chloroplast	COG0730-COG0730|cl21514-TauE	--	--
Ca_11831	Ca_11831.1|Ca_LG_4:54099774-54103585|plus|	3.52304	0.00192208	no	NA	NA	NA	54099774	54103585	+	Transketolase	PTHR11624 PTHR11624	IPR005474 IPR005475 IPR005476 IPR005478 IPR009014 IPR020826	PF00456 PF02779 PF02780	GO:0003824 GO:0004802 GO:0008152	PS00801 PS00802	SSF52518 SSF52922	Transketolase	XM_004497300.1	#has_catalytic_activity|#has_transketolase_activity|#involved_in_metabolic_process|#involved_in_response_to_cadmium_ion|#located_in_chloroplast|#located_in_chloroplast_stroma	PLN02790-PLN02790|cd02012-TPP_TK|cd07033-TPP_PYR_DXS_TK_like|cl01629-TPP_enzymes|cl08363-Transketolase_C|cl11410-TPP_enzyme_PYR	MYB-related	--
Ca_13861	Ca_13861.1|Ca_LG_5:32139265-32139916|plus|	-2.76561	0.00192208	no	NA	NA	NA	32139265	32139916	+	RING finger protein 38-like [Glycine max]	PTHR14155	IPR001841 IPR013083	PF13639	GO:0005515 GO:0008270	PS50089	SSF57850	E3_ubiquitin_ligase_BIG_BROTHER-related	XM_004502420.1	#has_zinc_ion_binding|#located_in_nucleus	cd00162-RING|cl17238-RING	--	--
Ca_14773	Ca_14773.1|Ca_LG_5:41271233-41286985|minus|	-1.91147	0.00192208	no	NA	NA	NA	41271233	41286985	-	homeobox protein knotted-1-like 3-like isoform X3 [Glycine max]	PTHR13109 PTHR13109	IPR001356 IPR005539 IPR005540 IPR005541 IPR008422 IPR008709 IPR009057 IPR016024	PF03789 PF03790 PF03791 PF05536 PF05920	GO:0003677 GO:0003700 GO:0005488 GO:0005634 GO:0006355	PS50071 PS51213	SSF46689 SSF48371	Homeobox_protein_knotted-1-like_3	XM_004501304.1	#located_in_cytoplasm	cd00086-homeodomain|cl00084-homeodomain|cl04261-ELK|cl04262-KNOX1|cl04263-KNOX2|cl20298-Neurochondrin	--	--
Ca_21355	Ca_21355.1|Ca_LG_7:37086569-37088285|minus|	6.41377	0.00192208	no	NA	NA	NA	37086569	37088285	-	P-loop containing nucleoside triphosphate hydrolases superfamily protein	PTHR23070 PTHR23070	IPR003593 IPR003959 IPR003960 IPR025753 IPR027417	PF00004 PF14363	GO:0000166 GO:0005524 GO:0017111	PS00674	SSF52540	Probable_mitochondrial_chaperone_BCS1-B	XM_004508741.1	#has_ATP_binding|#has_nucleoside-triphosphatase_activity|#has_nucleotide_binding|#located_in_plasma_membrane	cd00009-AAA|cl16828-AAA_assoc|cl21455-ABC_ATPase|smart00382-AAA	--	--
Ca_15677	Ca_15677.1|Ca_LG_6:5461032-5462005|plus|	-2.37853	0.0019552	no	NA	NA	NA	5461032	5462005	+	cytidine deaminase 1	PTHR11644 PTHR11644	IPR002125 IPR006263 IPR013171 IPR016193	PF00383 PF08211	GO:0003824 GO:0004126 GO:0008270 GO:0009972 GO:0016787		SSF53927	Cytidine_deaminase	XM_004503480.1	#has_catalytic_activity|#has_cytidine_deaminase_activity|#has_hydrolase_activity|#has_zinc_ion_binding|#involved_in_cytidine_deamination|#located_in_cytosol|#located_in_nucleus	PLN02402-PLN02402|cd01283-cytidine_deaminase|cl00269-cytidine_deaminase-like	--	--
Ca_21297	Ca_21297.1|Ca_LG_7:36439182-36441203|plus|	-2.3144	0.0019552	no	NA	NA	NA	36439182	36441203	+	acyl-CoA synthetase 5	PTHR24095	IPR000873 IPR020845 IPR025110	PF00501 PF13193	GO:0003824 GO:0008152	PS00455	SSF56801	Probable_acyl-activating_enzyme_8	XM_004490691.1	#has_catalytic_activity|#involved_in_metabolic_process|#located_in_mitochondrion	PRK08162-PRK08162|cd12118-ttLC_FACS_AEE21_like|cl17068-AFD_class_I	--	--
Ca_13839	Ca_13839.1|Ca_LG_5:31895139-31895700|plus|	-3.06022	0.00196911	no	NA	NA	NA	31895139	31895700	+	RING-H2 finger protein 2B	PTHR14155	IPR001841 IPR011016 IPR013083	PF13639	GO:0005515 GO:0008270	PS50089	SSF57850	E3_ubiquitin-protein_ligase_RNF43	XM_004502336.1	#has_zinc_ion_binding|#located_in_nucleus	cd00162-RING|cl17238-RING	--	--
Ca_07999	Ca_07999.1|Ca_LG_3:41950193-41951014|plus|	-7.07498	0.00197346	no	NA	NA	NA	41950193	41951014	+	c("mannan endo-1"	PTHR31451 PTHR31451	IPR013781 IPR017853 IPR024655	PF11790	GO:0005975		SSF51445	Putative_mannan_endo-1,4-beta-mannosidase_9	XM_004494885.1	#has_catalytic_activity|#has_cation_binding|#has_hydrolase_activity,_hydrolyzing_O-glycosyl_compounds|#involved_in_carbohydrate_metabolic_process|#located_in_extracellular_region	COG3934-COG3934	--	--
Ca_14529	Ca_14529.1|Ca_LG_5:38766065-38771797|minus|	2.74865	0.00197346	no	NA	NA	NA	38766065	38771797	-	filament-like plant protein 4-like isoform X2 [Glycine max]	PTHR31580 PTHR31580	IPR008587	PF05911			SSF57997	Filament-like_plant_protein_6	XM_004500895.1	#located_in_cytoplasm|#located_in_plasma_membrane	--	--	--
Ca_12385	Ca_12385.1|Ca_LG_5:8722489-8733510|plus|	-3.05613	0.00199116	no	NA	NA	NA	8722489	8733510	+	ATP-binding ABC transporter	PTHR19241 PTHR19241	IPR003439 IPR003593 IPR013525 IPR013581 IPR027417	PF00005 PF01061 PF08370 PF14510	GO:0000166 GO:0005524 GO:0016020 GO:0016887 GO:0017111	PS50893	SSF52540	ABC_transporter_G_family_member_31	XM_004500189.1	#has_ATP_binding|#has_ATPase_activity|#has_nucleoside-triphosphatase_activity|#has_nucleotide_binding|#located_in_membrane|#located_in_plasmodesma	PLN03140-PLN03140|cd03232-ABCG_PDR_domain2|cl07115-PDR_assoc|cl20552-ABC_trans_N|cl21455-ABC_ATPase|cl21474-ABC2_membrane	--	--
Ca_23350	Ca_23350.1|Ca_LG_8:14468211-14469904|minus|	-2.77551	0.00199116	no	NA	NA	NA	14468211	14469904	-	ascorbate peroxidase 3	PTHR31356 PTHR31356	IPR002016 IPR002207 IPR010255 IPR019793 IPR019794	PF00141	GO:0004601 GO:0006979 GO:0020037 GO:0055114	PS00435 PS00436 PS50873	SSF48113	L-ascorbate_peroxidase_3,_peroxisomal	XM_004512094.1	#has_heme_binding|#has_peroxidase_activity|#involved_in_oxidation-reduction_process|#involved_in_response_to_oxidative_stress|#located_in_chloroplast|#located_in_chloroplast_envelope|#located_in_mitochondrion|#located_in_peroxisome|#located_in_plasmodesma|#located_in_vacuolar_membrane|#located_in_vacuole	PLN02608-PLN02608|cd00691-ascorbate_peroxidase|cl00196-plant_peroxidase_like	MYB-related	--
Ca_03159	Ca_03159.1|Ca_LG_2:3218073-3223188|plus|	-2.49417	0.00200622	no	NA	NA	NA	3218073	3223188	+	cytochrome C oxidase assembly protein COX15	PTHR23289	IPR003780 IPR008811 IPR023754	PF02628 PF05691	GO:0006784 GO:0016020 GO:0016627 GO:0055114			Cytochrome_c_oxidase_assembly_protein_COX15	XM_004491486.1	#has_oxidoreductase_activity,_acting_on_the_CH-CH_group_of_donors|#involved_in_heme_a_biosynthetic_process|#involved_in_oxidation-reduction_process|#located_in_membrane|#located_in_mitochondrion	PTZ00127-PTZ00127|cl07893-AmyAc_family|cl19388-COX15-CtaA	--	--
Ca_14716	Ca_14716.1|Ca_LG_5:40663732-40665533|plus|	1.84579	0.00210404	no	NA	NA	NA	40663732	40665533	+	GTP-binding nuclear Ran-like protein	PTHR24071	IPR001806 IPR002041 IPR003578 IPR003579 IPR005225 IPR020849 IPR027417	PF00071	GO:0003924 GO:0005525 GO:0005622 GO:0006184 GO:0006886 GO:0006913 GO:0007165 GO:0007264 GO:0015031	PS51418	SSF52540	GTP-binding_nuclear_protein_Ran-A1	XM_004489747.1	#has_GTP_binding|#has_GTPase_activity|#involved_in_GTP_catabolic_process|#involved_in_intracellular_protein_transport|#involved_in_nucleocytoplasmic_transport|#involved_in_signal_transduction|#involved_in_small_GTPase_mediated_signal_transduction|#located_in_Golgi_apparatus|#located_in_nucleus|#located_in_plasmodesma	PTZ00132-PTZ00132|cd00877-Ran|cl21455-ABC_ATPase	--	--
Ca_17371	Ca_17371.1|Ca_LG_6:25419246-25422413|plus|	4.89703	0.00210404	no	NA	NA	NA	25419246	25422413	+	Cytochrome P450 superfamily protein	PTHR24296 PTHR24296	IPR001128 IPR002401 IPR017972	PF00067	GO:0005506 GO:0016705 GO:0020037 GO:0055114	PS00086	SSF48264	Cytochrome_P450_86B1	XM_004505652.1	#has_electron_carrier_activity|#has_heme_binding|#has_iron_ion_binding|#has_oxidoreductase_activity,_acting_on_paired_donors,_with_incorporation_or_reduction_of_molecular_oxygen|#involved_in_oxidation-reduction_process	PLN03195-PLN03195|cl12078-p450	--	--
Ca_25235	Ca_25235.1|scaffold02870:16230-17057|minus|	3.38916	0.00210404	no	NA	NA	NA	16230	17057	-	metallothionein 3							Metallothionein-like_protein_type_3	XM_004511191.1	#located_in_extracellular_region	--	--	--
Ca_08469	Ca_08469.1|Ca_LG_4:5976792-5977703|plus|	-1.74708	0.0021447	no	NA	NA	NA	5976792	5977703	+	syringolide-induced protein 14-1-1 [Glycine max]							Uncharacterized_protein_At1g76070_	XM_004499254.1	--	--	--	--
Ca_22826	Ca_22826.1|Ca_LG_8:7465398-7466321|plus|	-3.18802	0.0021447	no	NA	NA	NA	7465398	7466321	+	LOB domain-containing protein 10	PTHR31301	IPR004883	PF03195		PS50891		LOB_domain-containing_protein_36	XM_004511907.1	#located_in_nucleus	cl03929-DUF260	LBD	--
Ca_25777	Ca_25777.1|scaffold03731:15072-18251|minus|	-1.88738	0.00215091	no	NA	NA	NA	15072	18251	-	molybdenum cofactor biosynthesis protein A	PTHR22960 PTHR22960	IPR000385 IPR006638 IPR007197 IPR010505 IPR013483 IPR013785	PF04055 PF06463 PF13353	GO:0003824 GO:0006777 GO:0019008 GO:0046872 GO:0051536 GO:0051539	PS01305	SSF10211	Cyclic_pyranopterin_monophosphate_synthase,_mitochondrial	XM_004488513.1	#has_4_iron,_4_sulfur_cluster_binding|#has_catalytic_activity|#has_iron-sulfur_cluster_binding|#has_metal_ion_binding|#involved_in_Mo-molybdopterin_cofactor_biosynthetic_process|#located_in_molybdopterin_synthase_complex	PLN02951-PLN02951|cd01335-Radical_SAM|cl05790-Mob_synth_C|cl18962-Radical_SAM	--	--
Ca_07098	Ca_07098.1|Ca_LG_3:33666611-33667564|plus|	-6.409	0.00222492	no	NA	NA	NA	33666611	33667564	+	thylakoid membrane phosphoprotein 14 kDa protein		IPR025564	PF14159				Protein_CURVATURE_THYLAKOID_1B,_chloroplastic	XM_004517130.1	#located_in_chloroplast|#located_in_nucleoid	PLN02777-PLN02777|cl19721-CAAD	--	--
Ca_16300	Ca_16300.1|Ca_LG_6:12478398-12479874|minus|	2.85348	0.00223885	no	NA	NA	NA	12478398	12479874	-	Lipid transfer protein		IPR000528 IPR016140	PF14368	GO:0006869 GO:0008289		SSF47699	Non-specific_lipid-transfer_protein-like_protein_At5g64080	XM_004504719.1	#has_lipid_binding|#involved_in_lipid_transport|#located_in_anchored_to_plasma_membrane|#located_in_plasma_membrane	cd00010-AAI_LTSS|cl07890-AAI_LTSS	--	--
Ca_03299	Ca_03299.1|Ca_LG_2:4669779-4670412|minus|	-1.7973	0.0022518	no	NA	NA	NA	4669779	4670412	-	cysteine proteinase inhibitor [Glycine max]	PTHR11413 PTHR11413	IPR000010 IPR018073 IPR027214	PF00031	GO:0004869	PS00287	SSF54403	Cysteine_proteinase_inhibitor	XM_004491154.1	#has_cysteine-type_endopeptidase_inhibitor_activity|#located_in_cytosol|#located_in_extracellular_region	cd00042-CY|cl09238-CY	--	--
Ca_19509	Ca_19509.1|Ca_LG_7:7727421-7728106|plus|	4.42088	0.0022518	no	NA	NA	NA	7727421	7728106	+	uncharacterized protein LOC100800557 [Glycine max]							--	XM_004508099.1	--	--	--	--
Ca_16541	Ca_16541.1|Ca_LG_6:15574266-15574915|minus|	7.0425	0.00226238	no	NA	NA	NA	15574266	15574915	-	leguminosin group485 secreted peptide							--	XM_004504781.1	--	PHA03247-PHA03247	--	--
Ca_11049	Ca_11049.1|Ca_LG_4:38580303-38585273|plus|	-2.29774	0.0023304	no	NA	NA	NA	38580303	38585273	+	ATP-binding ABC transporter	PTHR24223 PTHR24223	IPR001140 IPR003439 IPR003593 IPR011527 IPR017871 IPR027417	PF00005 PF00664	GO:0000166 GO:0005524 GO:0006810 GO:0016021 GO:0016887 GO:0017111 GO:0042626 GO:0055085	PS00211 PS50893 PS50929	SSF52540 SSF90123	ABC_transporter_C_family_member_10	XM_004515058.1	#has_ATP_binding|#has_ATPase_activity|#has_ATPase_activity,_coupled_to_transmembrane_movement_of_substances|#has_nucleoside-triphosphatase_activity|#has_nucleotide_binding|#involved_in_transmembrane_transport|#involved_in_transport|#located_in_integral_to_membrane|#located_in_plasma_membrane|#located_in_vacuolar_membrane	COG1122-CbiO|cd03250-ABCC_MRP_domain1|cl00549-ABC_membrane|cl21455-ABC_ATPase	--	--
Ca_13234	Ca_13234.1|Ca_LG_5:25110580-25113952|minus|	3.93062	0.0023304	no	NA	NA	NA	25110580	25113952	-	nodulin MtN21 /EamA-like transporter family protein	PTHR31218 PTHR31218	IPR000620	PF00892	GO:0016020		SSF10348	WAT1-related_protein_At4g08290	XM_004500525.1	#located_in_extracellular_region|#located_in_membrane	COG0697-RhaT|cl00910-EamA	--	--
Ca_19296	Ca_19296.1|Ca_LG_7:4548401-4550495|plus|	5.9644	0.0023789	no	NA	NA	NA	4548401	4550495	+	uncharacterized protein LOC100805767 isoform X5 [Glycine max]							--	XM_004510601.1	--	--	--	--
Ca_03082	Ca_03082.1|Ca_LG_2:2608169-2609254|plus|	-3.82093	0.00241125	no	NA	NA	NA	2608169	2609254	+	Glutathione S-transferase family protein	PTHR11260 PTHR11260	IPR004045 IPR004046 IPR010987 IPR012336	PF00043 PF13417	GO:0005515	PS50404 PS50405	SSF47616 SSF52833	Glutathione_S-transferase_F9	XM_004491255.1	#functions_in_copper_ion_binding|#functions_in_glutathione_binding|#involved_in_defense_response_to_bacterium|#located_in_apoplast|#located_in_chloroplast|#located_in_chloroplast_stroma|#located_in_cytoplasm|#located_in_cytosol|#located_in_plasma_membrane|#located_in_plasmodesma|#located_in_thylakoid|#located_in_vacuole	PLN02395-PLN02395|cd03053-GST_N_Phi|cd03187-GST_C_Phi|cl00388-Thioredoxin_like|cl02776-GST_C_family	--	--
Ca_00509	Ca_00509.1|Ca_LG_1:5408018-5413540|plus|	-1.98434	0.00247938	no	NA	NA	NA	5408018	5413540	+	cytokinin riboside 5'-monophosphate phosphoribohydrolase LOG1-like [Glycine max]	PTHR31223 PTHR31223	IPR005269	PF03641			SSF10240	Cytokinin_riboside_5'-monophosphate_phosphoribohydrolase_LOG1_	XM_004487038.1	--	cl22440-TIR_2	--	--
Ca_02976	Ca_02976.1|Ca_LG_2:1618503-1619072|plus|	4.84981	0.00247938	no	NA	NA	NA	1618503	1619072	+	hypothetical protein							--	--	--	--	--	--
Ca_20794	Ca_20794.1|Ca_LG_7:30734063-30738500|plus|	-3.80168	0.00247938	no	NA	NA	NA	30734063	30738500	+	Unknown protein							--	KC189947.1	--	--	--	--
Ca_15353	Ca_15353.1|Ca_LG_6:2098053-2099132|plus|	4.06178	0.00248138	no	NA	NA	NA	2098053	2099132	+	Eukaryotic aspartyl protease family protein	PTHR13683 PTHR13683	IPR001461 IPR021109	PF14541 PF14543	GO:0004190 GO:0006508		SSF50630	Aspartic_proteinase_PCS1	XM_004503135.1	#has_aspartic-type_endopeptidase_activity|#involved_in_proteolysis|#located_in_extracellular_region	cd05476-pepsin_A_like_plant|cl11403-pepsin_retropepsin_like	--	--
Ca_00189	Ca_00189.1|Ca_LG_1:2165307-2167944|minus|	3.9428	0.00257337	no	NA	NA	NA	2165307	2167944	-	late embryogenesis abundant protein		IPR004864	PF03168				--	XM_004486685.1	#located_in_plasma_membrane	--	--	--
Ca_22233	Ca_22233.1|Ca_LG_8:824811-825794|plus|	2.76302	0.0026333	no	NA	NA	NA	824811	825794	+	Lipid transfer protein		IPR000528 IPR016140	PF14368	GO:0006869 GO:0008289		SSF47699	Non-specific_lipid-transfer_protein-like_protein_At2g13820	XM_004511334.1	#has_lipid_binding|#involved_in_lipid_transport|#located_in_plasma_membrane	cd00010-AAI_LTSS|cl07890-AAI_LTSS	--	--
Ca_06327	Ca_06327.1|Ca_LG_3:24050357-24051297|plus|	5.14474	0.00266774	no	NA	NA	NA	24050357	24051297	+	RING-H2 finger protein 2B	PTHR14155	IPR001841 IPR013083	PF13639	GO:0005515 GO:0008270	PS50089	SSF57850	RING-H2_finger_protein_ATL72	XM_004492497.1	#has_zinc_ion_binding|#located_in_nucleus	cd00162-RING|cl17238-RING	--	--
Ca_23379	Ca_23379.1|Ca_LG_8:14691966-14693355|minus|	1.80477	0.00271955	no	NA	NA	NA	14691966	14693355	-	phosphoserine aminotransferase	PTHR21152 PTHR21152	IPR000192 IPR003248 IPR015421 IPR015422 IPR015424 IPR020578 IPR022278	PF00266	GO:0003824 GO:0004648 GO:0006564 GO:0008152 GO:0030170	PS00595	SSF53383	Phosphoserine_aminotransferase,_chloroplastic	XM_004512193.1	#has_O-phospho-L-serine:2-oxoglutarate_aminotransferase_activity|#has_catalytic_activity|#has_pyridoxal_phosphate_binding|#involved_in_L-serine_biosynthetic_process|#involved_in_metabolic_process|#located_in_chloroplast|#located_in_chloroplast_stroma	COG1932-SerC|cd00611-PSAT_like|cl18945-AAT_I	--	--
Ca_05473	Ca_05473.1|Ca_LG_3:7012176-7014127|minus|	-7.91413	0.00273539	no	NA	NA	NA	7012176	7014127	-	2-oxoglutarate (2OG) and Fe(II)-dependent oxygenase superfamily protein	PTHR10209 PTHR10209	IPR005123 IPR026992 IPR027443	PF03171 PF14226	GO:0016491 GO:0016706 GO:0055114	PS51471	SSF51197	Probable_2-oxoglutarate-dependent_dioxygenase_AOP1.2	XM_004506821.1	#has_oxidoreductase_activity|#has_oxidoreductase_activity,_acting_on_paired_donors,_with_incorporation_or_reduction_of_molecular_oxygen,_2-oxoglutarate_as_one_donor,_and_incorporation_of_one_atom_each_of_oxygen_into_both_donors|#involved_in_oxidation-reduction_process|#located_in_cytoplasm	PTZ00273-PTZ00273|cl21496-2OG-FeII_Oxy|cl21672-DIOX_N	--	--
Ca_21532	Ca_21532.1|Ca_LG_7:38921819-38923468|minus|	-3.9504	0.00274127	no	NA	NA	NA	38921819	38923468	-	spermidine hydroxycinnamoyl transferase-like [Glycine max]	PTHR31642	IPR003480 IPR023213	PF02458	GO:0016747			Spermidine_hydroxycinnamoyl_transferase	XM_004507826.1	#has_transferase_activity,_transferring_acyl_groups_other_than_amino-acyl_groups|#located_in_cytoplasm	cl19241-Condensation	--	--
Ca_03539	Ca_03539.1|Ca_LG_2:7946002-7949129|minus|	6.72878	0.00282522	no	NA	NA	NA	7946002	7949129	-	c("Oxidoreductase"	PTHR11695 PTHR11695	IPR002085 IPR002364 IPR011032 IPR013154 IPR016040 IPR020843	PF08240 PF13602	GO:0008270 GO:0016491 GO:0016747 GO:0055114	PS01162	SSF50129 SSF51735	Quinone_oxidoreductase-like_protein_At1g23740,_chloroplastic	XM_004509762.1	#has_nucleotide_binding|#has_oxidoreductase_activity|#has_zinc_ion_binding|#involved_in_oxidation-reduction_process|#located_in_apoplast|#located_in_chloroplast|#located_in_chloroplast_envelope|#located_in_chloroplast_stroma|#located_in_thylakoid	COG0604-Qor|cd05289-MDR_like_2|cl16912-MDR	--	--
Ca_01757	Ca_01757.1|Ca_LG_1:27529079-27533402|plus|	2.02028	0.00290357	no	NA	NA	NA	27529079	27533402	+	Cytochrome P450 superfamily protein	PTHR24298 PTHR24298	IPR001128 IPR002401 IPR017972	PF00067	GO:0005506 GO:0016705 GO:0020037 GO:0055114	PS00086	SSF48264	Isoflavone_2'-hydroxylase	XM_004487831.1	#has_electron_carrier_activity|#has_heme_binding|#has_iron_ion_binding|#has_oxidoreductase_activity,_acting_on_paired_donors,_with_incorporation_or_reduction_of_molecular_oxygen|#involved_in_oxidation-reduction_process|#located_in_extracellular_region|#located_in_plasma_membrane	cl12078-p450	--	--
Ca_06417	Ca_06417.1|Ca_LG_3:25672680-25676420|minus|	4.61909	0.00290357	no	NA	NA	NA	25672680	25676420	-	AT hook motif DNA-binding family protein	PTHR31500 PTHR31500	IPR005175	PF03479			SSF11785	Putative_DNA-binding_protein_ESCAROLA	XM_004492581.1	#has_DNA_binding|#located_in_nucleus	cd11378-DUF296|cl00720-DUF296	--	--
Ca_07096	Ca_07096.1|Ca_LG_3:33657960-33662222|plus|	-1.64515	0.00290357	no	NA	NA	NA	33657960	33662222	+	response regulator 12	PTHR26402 PTHR26402	IPR001789 IPR010402 IPR011006	PF00072 PF06203	GO:0000156 GO:0000160 GO:0005515	PS50110 PS51017	SSF52172	Two-component_response_regulator-like_PRR95	XM_004494815.1	#has_phosphorelay_response_regulator_activity|#involved_in_phosphorelay_signal_transduction_system|#involved_in_regulation_of_transcription,_DNA-dependent|#located_in_nucleus	cd00156-REC|cl05620-CCT|cl19078-REC	--	--
Ca_21762	Ca_21762.1|Ca_LG_7:41128261-41130426|minus|	-2.51055	0.00290357	no	NA	NA	NA	41128261	41130426	-	TRAF-like family protein	PTHR24006 PTHR24006	IPR002083 IPR008974	PF00917	GO:0005515	PS50144	SSF49599	Ubiquitin_carboxyl-terminal_hydrolase_12	XM_004508036.1	#located_in_nucleus	cd00121-MATH|cl02446-MATH	--	--
Ca_01699	Ca_01699.1|Ca_LG_1:26461638-26462688|minus|	-4.64708	0.00292823	no	NA	NA	NA	26461638	26462688	-	nicotianamine synthase 2	PTHR32266 PTHR32266	IPR004298	PF03059	GO:0030410 GO:0030418	PS51142	SSF53335	Nicotianamine_synthase	XM_004488647.1	#has_nicotianamine_synthase_activity	cd02440-AdoMet_MTases|cl17173-AdoMet_MTases	--	--
Ca_03291	Ca_03291.1|Ca_LG_2:4592751-4594422|plus|	-2.02567	0.00292823	no	NA	NA	NA	4592751	4594422	+	protein kinase 2A	PTHR24420	IPR000719 IPR002290 IPR008271 IPR011009 IPR013320 IPR017441	PF00069	GO:0004672 GO:0004674 GO:0005524 GO:0006468 GO:0016772	PS00107 PS00108 PS50011	SSF56112	Protein_kinase_2B,_chloroplastic	XM_004491147.1	#has_ATP_binding|#has_protein_kinase_activity|#has_protein_serine/threonine_kinase_activity|#has_transferase_activity,_transferring_phosphorus-containing_groups|#involved_in_protein_phosphorylation|#located_in_chloroplast|#located_in_plasma_membrane	cd14066-STKc_IRAK|cl21453-PKc_like|smart00221-STYKc	--	--
Ca_24371	Ca_24371.1|scaffold01269:66344-68235|plus|	7.04094	0.00306126	no	NA	NA	NA	66344	68235	+	sequence-specific DNA binding transcription factors	PTHR31307 PTHR31307		PF13837				--	XM_004498632.1	#located_in_nucleus	cl21498-SANT	Trihelix	--
Ca_06825	Ca_06825.1|Ca_LG_3:30716200-30721085|minus|	2.50367	0.00310819	no	NA	NA	NA	30716200	30721085	-	5-methyltetrahydropteroyltriglutamate--homocysteine methyltransferase n=2 Tax=Alcaligenes RepID=M5J2G5_9BURK	PTHR30519 PTHR30519	IPR002629 IPR006276 IPR013215	PF01717 PF08267	GO:0003871 GO:0008270 GO:0008652 GO:0009086		SSF51726	5-methyltetrahydropteroyltriglutamate--homocysteine_methyltransferase	NM_001279076.1	#has_5-methyltetrahydropteroyltriglutamate-homocysteine_S-methyltransferase_activity|#has_zinc_ion_binding|#involved_in_cellular_amino_acid_biosynthetic_process|#involved_in_methionine_biosynthetic_process|#involved_in_response_to_salt_stress|#located_in_apoplast|#located_in_chloroplast|#located_in_cytoplasm|#located_in_cytosol|#located_in_membrane|#located_in_peroxisome|#located_in_plasma_membra…	PLN02475-PLN02475|cd03311-CIMS_C_terminal_like|cd03312-CIMS_N_terminal_like|cl00464-URO-D_CIMS_like	--	--
Ca_03233	Ca_03233.1|Ca_LG_2:3896464-3899777|plus|	-1.56076	0.00313305	no	NA	NA	NA	3896464	3899777	+	calcium-dependent protein kinase 33	PTHR24349 PTHR24349	IPR000719 IPR002048 IPR002290 IPR008271 IPR011009 IPR011992 IPR018247	PF00069 PF13499	GO:0004672	PS00018 PS00108 PS50011 PS50222	SSF47473 SSF56112	Calcium-dependent_protein_kinase_31	XM_004491343.1	#has_ATP_binding|#has_calcium_ion_binding|#has_protein_kinase_activity|#has_protein_modification_of_type_N-terminal_protein_myristoylation|#has_transferase_activity,_transferring_phosphorus-containing_groups|#involved_in_protein_phosphorylation|#located_in_plasma_membrane	PTZ00184-PTZ00184|cd00051-EFh|cd05117-STKc_CAMK|cl08302-EFh|cl21453-PKc_like|smart00220-S_TKc	--	--
Ca_00218	Ca_00218.1|Ca_LG_1:2364904-2365530|plus|	3.67493	0.00317768	no	NA	NA	NA	2364904	2365530	+	Avr9/Cf-9 rapidly elicited protein		IPR008480	PF05553				--	XM_004486721.1	--	cl05229-DUF761	--	--
Ca_25688	Ca_25688.1|scaffold03589:7947-9111|plus|	-4.63135	0.00327346	no	NA	NA	NA	7947	9111	+	pectinesterase family protein	PTHR31707 PTHR31707	IPR000070 IPR011050 IPR012334 IPR018040	PF01095	GO:0005618 GO:0030599 GO:0042545	PS00503	SSF51126	Probable_pectinesterase/pectinesterase_inhibitor_41	XM_004513352.1	#has_enzyme_inhibitor_activity|#has_pectinesterase_activity|#involved_in_cell_wall_modification|#located_in_cell_wall|#located_in_extracellular_region	cl01911-Pectinesterase	--	--
Ca_14237	Ca_14237.1|Ca_LG_5:36070226-36074279|plus|	2.71	0.00330556	no	NA	NA	NA	36070226	36074279	+	metal-nicotianamine transporter YSL3-like isoform X1 [Glycine max]	PTHR31645 PTHR31645	IPR004813	PF03169	GO:0055085			Probable_metal-nicotianamine_transporter_YSL8	XM_003527948.2	#involved_in_transmembrane_transport|#located_in_plasma_membrane	cl14607-OPT	--	--
Ca_22692	Ca_22692.1|Ca_LG_8:6178390-6184313|plus|	4.29322	0.00330556	no	NA	NA	NA	6178390	6184313	+	two-component response regulator-like APRR2-like isoform X2 [Glycine max]	PTHR31312 PTHR31312	IPR001005 IPR001789 IPR006447 IPR009057 IPR011006 IPR017930	PF00072 PF00249	GO:0000156 GO:0000160 GO:0003677 GO:0003682	PS50110 PS51294	SSF46689 SSF52172	Two-component_response_regulator-like_APRR2	XM_004511711.1	#has_phosphorelay_response_regulator_activity|#involved_in_phosphorelay_signal_transduction_system|#involved_in_regulation_of_transcription,_DNA-dependent|#located_in_nucleus	PLN03162-PLN03162|TIGR01557-unnamed_protein_product|cd00156-REC|cl19078-REC|cl21498-SANT	ARR-B	--
Ca_00867	Ca_00867.1|Ca_LG_1:9724519-9726745|minus|	7.54684	0.00364585	no	NA	NA	NA	9724519	9726745	-	transcription factor	PTHR23042 PTHR23042	IPR011598	PF00010	GO:0046983	PS50888	SSF47459	Transcription_factor_ILR3	XM_004487559.1	#located_in_nucleus	cd00083-HLH|cl00081-HLH|cl13726-TMF_DNA_bd	bHLH	--
Ca_02230	Ca_02230.1|Ca_LG_1:33766690-33767952|minus|	-2.19283	0.00369553	no	NA	NA	NA	33766690	33767952	-	c("F-box plant-like protein"	PTHR31478	IPR027949	PF14476				Probable_F-box_protein_At4g22030_	XM_004486115.1	--	cl20529-Chloroplast_duf	--	--
Ca_26197	Ca_26197.1|scaffold04478:5543-11732|minus|	-1.92141	0.00369553	no	NA	NA	NA	5543	11732	-	Transmembrane amino acid transporter family protein	PTHR22950 PTHR22950	IPR013057	PF01490				Lysine_histidine_transporter-like_6	XM_004514741.1	#located_in_plasma_membrane	cl00456-SLC5-6-like_sbd	--	--
Ca_24089	Ca_24089.1|contig62766:116-767|plus|	-2.22104	0.00373852	no	NA	NA	NA	116	767	+	probable 2-oxoglutarate/Fe(II)-dependent dioxygenase-like [Glycine max]	PTHR10209 PTHR10209	IPR005123 IPR026992 IPR027443	PF03171 PF14226	GO:0016491 GO:0016706 GO:0055114		SSF51197	Protein_SRG1	XM_004504546.1	#has_oxidoreductase_activity|#has_oxidoreductase_activity,_acting_on_paired_donors,_with_incorporation_or_reduction_of_molecular_oxygen,_2-oxoglutarate_as_one_donor,_and_incorporation_of_one_atom_each_of_oxygen_into_both_donors|#involved_in_oxidation-reduction_process|#located_in_cytoplasm	cl21496-2OG-FeII_Oxy|cl21672-DIOX_N	--	--
Ca_15466	Ca_15466.1|Ca_LG_6:3210478-3212798|plus|	-1.78316	0.00380855	no	NA	NA	NA	3210478	3212798	+	Calmodulin binding protein-like	PTHR31713 PTHR31713	IPR012416	PF07887				--	XM_004503320.1	#located_in_nucleus	cl06775-Calmodulin_bind	--	--
Ca_03348	Ca_03348.1|Ca_LG_2:5266740-5267531|plus|	-2.7061	0.00384091	no	NA	NA	NA	5266740	5267531	+	hsp20/alpha crystallin family protein		IPR008978				SSF49764	--	XM_004491099.1	#located_in_membrane|#located_in_nucleus	cd06464-ACD_sHsps-like|cl00175-alpha-crystallin-Hsps_p23-like	--	--
Ca_07729	Ca_07729.1|Ca_LG_3:39476404-39480284|minus|	2.31572	0.00384091	no	NA	NA	NA	39476404	39480284	-	F-actin-capping protein subunit alpha	PTHR10653 PTHR10653	IPR002189 IPR017865	PF01267	GO:0003779 GO:0008290 GO:0030036 GO:0071203	PS00748 PS00749	SSF90096	F-actin-capping_protein_subunit_alpha	XM_004494535.1	#has_actin_binding|#located_in_F-actin_capping_protein_complex|#located_in_cytoplasm|#located_in_nucleus	cl03143-F-actin_cap_A	--	--
Ca_14301	Ca_14301.1|Ca_LG_5:36631660-36632401|plus|	-7.24773	0.00384091	no	NA	NA	NA	36631660	36632401	+	Defensin MtDef4.6		IPR003614 IPR008176 IPR008177	PF00304	GO:0006952	PS00940	SSF57095	Defensin-like_protein_6	XM_004502957.1	#involved_in_defense_response|#located_in_extracellular_region	cd00107-Knot1|cl11589-Knot1	--	--
Ca_17515	Ca_17515.1|Ca_LG_6:27715070-27716972|minus|	7.03894	0.00384091	no	NA	NA	NA	27715070	27716972	-	aluminum-activated malate transporter 1	PTHR31086 PTHR31086	IPR020966	PF11744	GO:0015743			Aluminum-activated_malate_transporter_2	XM_004506164.1	#involved_in_response_to_aluminum_ion|#located_in_plasma_membrane	cl19401-FUSC_2	--	--
Ca_23537	Ca_23537.1|Ca_LG_8:16521105-16524286|minus|	6.37989	0.00384091	no	NA	NA	NA	16521105	16524286	-	ATP binding / kinase/ protein kinase/ protein serine/threonine kinase/ protein-tyrosine kinase n=4 Tax=rosids RepID=C5DB54_VITVI	PTHR24420	IPR000719 IPR001245 IPR008271 IPR011009 IPR017441	PF07714	GO:0004672 GO:0004674 GO:0005524 GO:0006468 GO:0016772	PS00107 PS00108 PS50011	SSF56112	Serine/threonine-protein_kinase_At5g01020	XM_004512301.1	#has_ATP_binding|#has_protein_kinase_activity|#has_protein_serine/threonine_kinase_activity|#has_transferase_activity,_transferring_phosphorus-containing_groups|#involved_in_protein_phosphorylation	cd14066-STKc_IRAK|cl21453-PKc_like|smart00219-TyrKc	--	--
Ca_14645	Ca_14645.1|Ca_LG_5:39944916-39955253|plus|	-2.51526	0.00395786	no	NA	NA	NA	39944916	39955253	+	bromo-adjacent homology (BAH) domain-containing protein		IPR000504 IPR012677		GO:0000166 GO:0003676	PS50102	SSF54928	--	XM_004501136.1	#has_DNA_binding|#has_nucleic_acid_binding|#located_in_nucleus	cd00590-RRM_SF|cl02608-BAH|cl17169-RRM_SF|smart00360-RRM	--	--
Ca_17966	Ca_17966.1|Ca_LG_6:37481408-37483374|minus|	2.83696	0.0040269	no	NA	NA	NA	37481408	37483374	-	HXXXD-type acyl-transferase family protein	PTHR31896 PTHR31896	IPR003480 IPR023213	PF02458	GO:0016747		SSF52777	BAHD_acyltransferase_DCR	XM_004506726.1	#has_transferase_activity,_transferring_acyl_groups_other_than_amino-acyl_groups|#located_in_cytoplasm	cl19241-Condensation	--	--
Ca_18727	Ca_18727.1|Ca_LG_6:51060174-51061360|minus|	5.69611	0.00441644	no	NA	NA	NA	51060174	51061360	-	transmembrane protein 45B-like [Glycine max]	PTHR16007	IPR006904	PF04819				Transmembrane_protein_45B_	XM_004507315.1	--	cl04775-DUF716	--	--
Ca_00927	Ca_00927.1|Ca_LG_1:10588035-10591910|plus|	1.66349	0.00448743	no	NA	NA	NA	10588035	10591910	+	c("Oxidoreductase"	PTHR11695 PTHR11695	IPR002085 IPR011032 IPR013154 IPR016040 IPR020843	PF08240 PF13602	GO:0008270 GO:0016491 GO:0016747 GO:0055114		SSF50129 SSF51735	Reticulon-4-interacting_protein_1,_mitochondrial	XM_004489007.1	#has_nucleotide_binding|#has_oxidoreductase_activity|#has_zinc_ion_binding|#involved_in_oxidation-reduction_process|#located_in_mitochondrion	COG0604-Qor|cl16912-MDR	--	--
Ca_02408	Ca_02408.1|Ca_LG_1:35539930-35541636|minus|	-3.28101	0.00459995	no	NA	NA	NA	35539930	35541636	-	phospholipase A1-IIgamma-like [Glycine max]	PTHR31828 PTHR31828	IPR002921	PF01764	GO:0004806 GO:0006629		SSF53474	Phospholipase_A1-IIgamma	XM_004485825.1	#has_triglyceride_lipase_activity|#involved_in_lipid_metabolic_process	PLN02571-PLN02571|cd00519-Lipase_3|cl21494-Esterase_lipase	--	--
Ca_14103	Ca_14103.1|Ca_LG_5:34859880-34862203|plus|	2.41498	0.00464156	no	NA	NA	NA	34859880	34862203	+	Peroxidase superfamily protein	PTHR31388 PTHR31388	IPR000823 IPR002016 IPR010255 IPR019793 IPR019794	PF00141	GO:0004601 GO:0006979 GO:0020037 GO:0055114	PS00435 PS00436 PS50873	SSF48113	Peroxidase_52	XM_004502798.1	#has_heme_binding|#has_peroxidase_activity|#involved_in_oxidation-reduction_process|#involved_in_response_to_oxidative_stress|#located_in_Golgi_apparatus|#located_in_apoplast|#located_in_cell_wall|#located_in_cytosol|#located_in_extracellular_region	cd00693-secretory_peroxidase|cl00196-plant_peroxidase_like	--	--
Ca_25551	Ca_25551.1|scaffold03374:16016-17436|minus|	3.67982	0.00465512	no	NA	NA	NA	16016	17436	-	UDP-glucosyltransferase family protein	PTHR11926 PTHR11926	IPR002213	PF00201	GO:0008152 GO:0016758	PS00375	SSF53756	Hydroquinone_glucosyltransferase	KF039758.1	#has_transferase_activity,_transferring_hexosyl_groups|#involved_in_metabolic_process|#involved_in_response_to_salt_stress|#located_in_nucleus	PLN03015-PLN03015|cl21512-Glycos_transf_1	--	--
Ca_21336	Ca_21336.1|Ca_LG_7:36898341-36899246|plus|	-2.70094	0.00470287	no	NA	NA	NA	36898341	36899246	+	18.1 kDa class I heat shock protein-like [Glycine max]		IPR002068 IPR008978	PF00011		PS01031	SSF49764	16.6_kDa_heat_shock_protein	XM_004508715.1	#located_in_membrane|#located_in_nucleus	COG0071-IbpA|cd06464-ACD_sHsps-like|cl00175-alpha-crystallin-Hsps_p23-like	--	--
Ca_27051	Ca_27051.1|scaffold06679:4345-5740|minus|	-2.87072	0.00470287	no	NA	NA	NA	4345	5740	-	nicotianamine synthase 1	PTHR32266 PTHR32266	IPR004298	PF03059	GO:0030410 GO:0030418	PS51142		Nicotianamine_synthase	XM_004494487.1	#has_nicotianamine_synthase_activity	PLN03075-PLN03075|cl17173-AdoMet_MTases	--	--
Ca_20826	Ca_20826.1|Ca_LG_7:31087934-31089920|plus|	2.978	0.00471334	no	NA	NA	NA	31087934	31089920	+	FAD-dependent oxidoreductase family protein	PTHR13847 PTHR13847	IPR006076	PF01266	GO:0016491 GO:0055114		SSF51905	Putative_oxidoreductase_C1F5.03c	XM_004509148.1	#has_oxidoreductase_activity|#involved_in_oxidation-reduction_process	COG0665-DadA|cl21454-SDR	--	--
Ca_07494	Ca_07494.1|Ca_LG_3:37311111-37315537|plus|	2.81928	0.00475614	no	NA	NA	NA	37311111	37315537	+	ATP binding/protein serine/threonine kinase [Glycine max]	PTHR24420 PTHR24420	IPR000719 IPR001245 IPR002290 IPR008271 IPR011009 IPR013320 IPR017441 IPR024788 IPR025875	PF07714 PF12799 PF12819		PS00107 PS00108 PS50011	SSF52058	Probable_LRR_receptor-like_serine/threonine-protein_kinase_At1g67720	XM_004493884.1	#has_ATP_binding|#has_protein_kinase_activity|#has_protein_serine/threonine_kinase_activity|#has_transferase_activity,_transferring_phosphorus-containing_groups|#involved_in_protein_phosphorylation|#located_in_plasma_membrane	cd14066-STKc_IRAK|cl21453-PKc_like	--	--
Ca_21582	Ca_21582.1|Ca_LG_7:39417256-39420425|minus|	4.16723	0.00493899	no	NA	NA	NA	39417256	39420425	-	Peroxidase superfamily protein	PTHR31388 PTHR31388	IPR000823 IPR002016 IPR010255 IPR019793 IPR019794	PF00141	GO:0004601 GO:0006979 GO:0020037 GO:0055114	PS00435 PS00436 PS50873	SSF48113	Peroxidase_N	XM_004507903.1	#has_heme_binding|#has_peroxidase_activity|#involved_in_oxidation-reduction_process|#involved_in_response_to_oxidative_stress|#located_in_extracellular_region	cd00693-secretory_peroxidase|cl00196-plant_peroxidase_like	--	--
Ca_06797	Ca_06797.1|Ca_LG_3:30296607-30298602|plus|	-3.73773	0.004995	no	NA	NA	NA	30296607	30298602	+	xyloglucan endotransglucosylase/hydrolase 5	PTHR31062 PTHR31062	IPR000757 IPR008263 IPR008985 IPR010713 IPR013320 IPR016455	PF00722 PF06955	GO:0004553 GO:0005618 GO:0005975 GO:0006073 GO:0016762 GO:0048046	PS01034	SSF49899	Xyloglucan_endotransglucosylase/hydrolase	NM_001278984.1	#has_hydrolase_activity,_hydrolyzing_O-glycosyl_compounds|#has_xyloglucan:xyloglucosyl_transferase_activity|#involved_in_carbohydrate_metabolic_process|#involved_in_cellular_glucan_metabolic_process|#located_in_apoplast|#located_in_cell_wall|#located_in_chloroplast|#located_in_extracellular_region|#located_in_membrane|#located_in_plant-type_cell_wall|#located_in_plasmodesma	PLN03161-PLN03161|cd02176-GH16_XET|cl00218-Glyco_hydrolase_16	--	--
Ca_20735	Ca_20735.1|Ca_LG_7:29797757-29802669|plus|	2.11813	0.004995	no	NA	NA	NA	29797757	29802669	+	protein DA1-related 1-like isoform X7 [Glycine max]	PTHR24209	IPR001781 IPR003903 IPR022087	PF00412 PF12315	GO:0008270	PS00478 PS50023 PS50330	SSF57716	Protein_DA1	XM_004509172.1	#has_zinc_ion_binding|#located_in_nucleus	cd09396-LIM_DA1|cl02475-LIM|cl04380-Upf2|cl13714-DUF3633	--	--
Ca_21643	Ca_21643.1|Ca_LG_7:39979188-39982488|minus|	2.40792	0.00517759	no	NA	NA	NA	39979188	39982488	-	F-box family protein	PTHR23125 PTHR23125	IPR001810 IPR006553	PF12937 PF13516	GO:0005515		SSF52047 SSF81383	EIN3-binding_F-box_protein_2	XM_004508431.1	#located_in_nucleus	cl02535-F-box|cl22709-AMN1	--	--
Ca_16218	Ca_16218.1|Ca_LG_6:11572982-11575865|plus|	-4.86031	0.00520618	no	NA	NA	NA	11572982	11575865	+	c("cytochrome P450"	PTHR24286 PTHR24286	IPR001128 IPR002401 IPR017972	PF00067	GO:0005506 GO:0016705 GO:0020037 GO:0055114	PS00086	SSF48264	Cytochrome_P450_716B1	XM_004504152.1	#has_electron_carrier_activity|#has_heme_binding|#has_iron_ion_binding|#has_oxidoreductase_activity,_acting_on_paired_donors,_with_incorporation_or_reduction_of_molecular_oxygen|#involved_in_oxidation-reduction_process|#located_in_extracellular_region	cl12078-p450	--	--
Ca_15626	Ca_15626.1|Ca_LG_6:5040510-5041456|plus|	-2.98468	0.00524537	no	NA	NA	NA	5040510	5041456	+	uncharacterized protein LOC102662772 [Glycine max]		IPR025322	PF14009				--	XM_004503541.1	#has_protein_modification_of_type_N-terminal_protein_myristoylation|#located_in_nucleus	cl16533-DUF4228	--	--
Ca_22866	Ca_22866.1|Ca_LG_8:7807827-7809573|minus|	-2.25635	0.00524537	no	NA	NA	NA	7807827	7809573	-	Protein of unknown function (DUF607)	PTHR13462 PTHR13462	IPR006769	PF04678				Calcium_uniporter_protein,_mitochondrial	XM_004511949.1	#located_in_chloroplast	cl12298-DUF607	--	--
Ca_14953	Ca_14953.1|Ca_LG_5:43219062-43220485|plus|	1.74715	0.00542538	no	NA	NA	NA	43219062	43220485	+	sterol methyltransferase 2	PTHR10108 PTHR10108	IPR013216 IPR013705 IPR025769	PF08241 PF08498	GO:0006694 GO:0008152 GO:0008168 GO:0008757	PS51596	SSF53335	24-methylenesterol_C-methyltransferase_2	XM_004500854.1	#has_methyltransferase_activity|#involved_in_metabolic_process|#involved_in_steroid_biosynthetic_process	PLN02244-PLN02244|cd02440-AdoMet_MTases|cl07208-Sterol_MT_C|cl17173-AdoMet_MTases	--	--
Ca_22607	Ca_22607.1|Ca_LG_8:5369939-5373391|minus|	-3.29977	0.00551516	no	NA	NA	NA	5369939	5373391	-	beta-fructofuranosidase 5	PTHR31953 PTHR31953	IPR001362 IPR008985 IPR013148 IPR013189 IPR018053 IPR021792 IPR023296	PF00251 PF08244 PF11837	GO:0004553 GO:0004564 GO:0004575 GO:0005975	PS00609	SSF49899 SSF75005	Bifunctional_6(G)-fructosyltransferase/2,1-fructan:2,1-fructan_1-fructosyltransferase	XM_004511606.1	#has_beta-fructofuranosidase_activity|#has_hydrolase_activity,_hydrolyzing_O-glycosyl_compounds|#has_sucrose_alpha-glucosidase_activity|#involved_in_carbohydrate_metabolic_process|#located_in_vacuole	cd08996-GH32_B_Fructosidase|cl07030-Glyco_hydro_32C|cl13304-DUF3357|cl14647-GH43_62_32_68|smart00640-Glyco_32	--	--
Ca_02971	Ca_02971.1|Ca_LG_2:1564466-1565848|minus|	-4.00889	0.00552381	no	NA	NA	NA	1564466	1565848	-	Ethylene insensitive 3 family protein			PF04873				Putative_ETHYLENE_INSENSITIVE_3-like_4_protein	XM_004503997.1	#has_sequence-specific_DNA_binding_transcription_factor_activity|#located_in_nucleus	cl04813-EIN3	EIL	--
Ca_19310	Ca_19310.1|Ca_LG_7:4784849-4785724|plus|	2.40599	0.00556364	no	NA	NA	NA	4784849	4785724	+	Avr9/Cf-9 rapidly elicited protein		IPR008480	PF05553				--	XM_004510242.1	--	cl05229-DUF761	--	--
Ca_25343	Ca_25343.1|scaffold03056:35308-36145|minus|	-3.56833	0.00556364	no	NA	NA	NA	35308	36145	-	Unknown protein							--	KC189947.1	--	--	--	--
Ca_25938	Ca_25938.1|scaffold03977:14983-18144|plus|	-3.34649	0.00556364	no	NA	NA	NA	14983	18144	+	ATP-dependent zinc metalloprotease FTSH protein	PTHR23076 PTHR23076	IPR000642 IPR003593 IPR003959 IPR003960 IPR005936 IPR027417	PF00004 PF01434	GO:0000166 GO:0004222 GO:0005524 GO:0006508 GO:0016020 GO:0017111	PS00674	SSF14099 SSF52540	ATP-dependent_zinc_metalloprotease_FTSH_6,_chloroplastic	XM_004491748.1	#has_ATP_binding|#has_metalloendopeptidase_activity|#has_nucleoside-triphosphatase_activity|#has_nucleotide_binding|#has_zinc_ion_binding|#involved_in_protein_catabolic_process|#involved_in_proteolysis|#located_in_chloroplast|#located_in_integral_to_membrane|#located_in_membrane	cd00009-AAA|cl03209-Peptidase_M41|cl21455-ABC_ATPase|smart00382-AAA	--	--
Ca_07161	Ca_07161.1|Ca_LG_3:34218837-34221037|minus|	-6.74649	0.00573121	no	NA	NA	NA	34218837	34221037	-	polygalacturonase 4	PTHR31375 PTHR31375	IPR000743 IPR006626 IPR011050 IPR012334	PF00295	GO:0004650 GO:0005975	PS00502	SSF51126	Polygalacturonase_At1g48100	XM_004494397.1	#has_polygalacturonase_activity|#involved_in_carbohydrate_metabolic_process|#located_in_extracellular_region	cl19188-Pectate_lyase_3	--	--
Ca_17904	Ca_17904.1|Ca_LG_6:35976690-35979389|minus|	-2.17019	0.00579533	no	NA	NA	NA	35976690	35979389	-	mitochondrial substrate carrier family protein B-like [Glycine max]	PTHR24089 PTHR24089	IPR002067 IPR018108 IPR023395	PF00153	GO:0055085	PS50920	SSF10350	Mitochondrial_arginine_transporter_BAC2	XM_004506792.1	#located_in_mitochondrion	cl02813-Mito_carr	--	--
Ca_16538	Ca_16538.1|Ca_LG_6:15553000-15554767|plus|	-2.48777	0.00590607	no	NA	NA	NA	15553000	15554767	+	uncharacterized protein LOC102659744 [Glycine max]							--	XM_004504776.1	--	--	--	--
Ca_18662	Ca_18662.1|Ca_LG_6:50360940-50365118|minus|	-6.03719	0.00590607	no	NA	NA	NA	50360940	50365118	-	beta glucosidase 16	PTHR10353	IPR001360 IPR013781 IPR017853	PF00232	GO:0004553 GO:0005975		SSF51445	Cyanogenic_beta-glucosidase_(Fragment)	XM_004507081.1	#has_catalytic_activity|#has_cation_binding|#has_hydrolase_activity,_hydrolyzing_O-glycosyl_compounds|#involved_in_carbohydrate_metabolic_process|#located_in_extracellular_region	cl01046-BglB	--	--
Ca_20232	Ca_20232.1|Ca_LG_7:22308631-22311629|minus|	5.33847	0.00590607	no	NA	NA	NA	22308631	22311629	-	cyclin-dependent protein kinase 3	PTHR10177 PTHR10177	IPR004367 IPR006671 IPR013763 IPR014400 IPR015451	PF00134 PF02984	GO:0000079 GO:0005634 GO:0007049 GO:0019901 GO:0051726	PS00292	SSF47954	Cyclin-D1-1	XM_004509810.1	#located_in_nucleus	cd00043-CYCLIN|cl00050-CYCLIN	--	--
Ca_24345	Ca_24345.1|scaffold01219:17689-20600|minus|	-5.66112	0.00601076	no	NA	NA	NA	17689	20600	-	cinnamyl alcohol dehydrogenase 6	PTHR11695 PTHR11695	IPR002085 IPR002328 IPR011032 IPR013149 IPR013154 IPR016040 IPR020843	PF00107 PF08240	GO:0008270 GO:0016491 GO:0016747 GO:0055114	PS00059	SSF50129 SSF51735	Probable_mannitol_dehydrogenase	XM_004512502.1	#has_nucleotide_binding|#has_oxidoreductase_activity|#has_transferase_activity,_transferring_acyl_groups_other_than_amino-acyl_groups|#has_zinc_ion_binding|#involved_in_oxidation-reduction_process|#located_in_cytoplasm	PLN02586-PLN02586|cd05283-CAD1|cl16912-MDR	--	--
Ca_04437	Ca_04437.1|Ca_LG_2:24954893-24956052|plus|	-3.09438	0.00605922	no	NA	NA	NA	24954893	24956052	+	ubiquitin-protein ligase							--	XM_004516802.1	--	cl02535-F-box	--	--
Ca_04752	Ca_04752.1|Ca_LG_2:29060228-29061787|minus|	3.02736	0.00610362	no	NA	NA	NA	29060228	29061787	-	UDP-Glycosyltransferase superfamily protein	PTHR11926 PTHR11926	IPR002213	PF00201	GO:0008152 GO:0016758	PS00375	SSF53756	UDP-glycosyltransferase_85A2	XM_004489394.1	#has_transferase_activity,_transferring_hexosyl_groups|#involved_in_metabolic_process|#located_in_nucleus	PLN02410-PLN02410|cd03784-GT1_Gtf_like|cl10013-Glycosyltransferase_GTB_type	--	--
Ca_03029	Ca_03029.1|Ca_LG_2:2065823-2067127|plus|	-5.37033	0.00616287	no	NA	NA	NA	2065823	2067127	+	F-box protein interaction domain protein		IPR001810 IPR006527 IPR017451	PF07734	GO:0005515		SSF81383	F-box_protein_CPR30	XM_004491332.1	#located_in_cytoplasm	cl02535-F-box|cl19514-FBA_1|smart00256-FBOX	--	--
Ca_08769	Ca_08769.1|Ca_LG_4:9329621-9331765|plus|	-2.56154	0.00646796	no	NA	NA	NA	9329621	9331765	+	titin-like [Glycine max]							--	XM_004499111.1	#located_in_chloroplast	--	--	--
Ca_14607	Ca_14607.1|Ca_LG_5:39546655-39547893|plus|	-2.97787	0.00646796	no	NA	NA	NA	39546655	39547893	+	CBS domain-containing protein CBSCBSPB1-like isoform X3 [Glycine max]	PTHR11911 PTHR11911	IPR000644	PF00571	GO:0030554	PS51371	SSF54631	CBS_domain-containing_protein_CBSX3,_mitochondrial	XM_004500950.1	#located_in_mitochondrion	cd04623-CBS_pair_10|cl15354-CBS_pair	--	--
Ca_02420	Ca_02420.1|Ca_LG_1:35664970-35676777|plus|	3.78135	0.00648839	no	NA	NA	NA	35664970	35676777	+	uncharacterized protein LOC100778886 [Glycine max]	PTHR31165 PTHR31165	IPR006936	PF04852				--	XM_004485837.1	#located_in_nucleus	cl04800-DUF640	--	--
Ca_11858	Ca_11858.1|Ca_LG_4:54548036-54552483|minus|	-2.14618	0.00653757	no	NA	NA	NA	54548036	54552483	-	uncharacterized protein At4g15970-like isoform X1 [Glycine max]	PTHR24015 PTHR24015	IPR005069	PF03407			SSF53448	Uncharacterized_protein_At4g15970	XM_004497110.1	#located_in_chloroplast	cd00303-retropepsin_like|cl11394-Glyco_tranf_GTA_type|cl11403-pepsin_retropepsin_like	--	--
Ca_26247	Ca_26247.1|scaffold04582:19789-22316|minus|	6.6463	0.0065683	no	NA	NA	NA	19789	22316	-	polygalacturonase non-catalytic protein	PTHR31458 PTHR31458	IPR004873	PF03181		PS51277		Probable_polygalacturonase_non-catalytic_subunit_At1g60390	XM_004509764.1	#located_in_extracellular_region	cl03923-BURP	--	--
Ca_00878	Ca_00878.1|Ca_LG_1:9957108-9958510|plus|	4.4652	0.00665884	no	NA	NA	NA	9957108	9958510	+	probable carboxylesterase 15-like [Glycine max]	PTHR23024 PTHR23024	IPR013094	PF07859	GO:0008152 GO:0016787		SSF53474	Probable_carboxylesterase_17	XM_004499713.1	#has_hydrolase_activity|#involved_in_metabolic_process	cl21494-Esterase_lipase	--	--
Ca_19093	Ca_19093.1|Ca_LG_7:1315287-1316797|plus|	-5.31492	0.00665884	no	NA	NA	NA	1315287	1316797	+	ninja-family protein mc410	PTHR31413 PTHR31413	IPR012463	PF07897				Ninja-family_protein_AFP3	XM_004510193.1	#located_in_nucleus	cl06780-DUF1675	--	--
Ca_20977	Ca_20977.1|Ca_LG_7:32880679-32880930|plus|	-6.89989	0.0067647	no	NA	NA	NA	32880679	32880930	+	Unknown protein							--	KJ808796.1	--	--	--	--
Ca_04419	Ca_04419.1|Ca_LG_2:24626748-24628278|minus|	-1.57379	0.00677576	no	NA	NA	NA	24626748	24628278	-	Disease resistance protein (TIR-NBS-LRR class) family	PTHR11017 PTHR11017	IPR000157	PF01582	GO:0005515 GO:0007165	PS50104	SSF52200	TMV_resistance_protein_N	BT136923.1	#involved_in_signal_transduction|#located_in_cytoplasm|#located_in_intracellular	cl22462-TIR	--	TIR
Ca_19245	Ca_19245.1|Ca_LG_7:3806526-3810692|plus|	-6.45186	0.00677576	no	NA	NA	NA	3806526	3810692	+	protein EARLY FLOWERING 3-like isoform X3 [Glycine max]							Protein_EARLY_FLOWERING_3	XM_004510278.1	#located_in_nucleus	--	--	--
Ca_03585	Ca_03585.1|Ca_LG_2:8646194-8648290|plus|	-2.49458	0.00691392	no	NA	NA	NA	8646194	8648290	+	U-box domain-containing protein 13-like [Glycine max]	PTHR23315 PTHR23315	IPR000225 IPR003613 IPR011989 IPR013083 IPR016024	PF00514 PF04564	GO:0000151 GO:0004842 GO:0005488 GO:0005515 GO:0016567	PS50176	SSF48371 SSF57850	U-box_domain-containing_protein_13	XM_004490964.1	#involved_in_protein_ubiquitination|#located_in_cytosol|#located_in_nucleus	cd00020-ARM|cl17238-RING|cl22454-ARM|smart00504-Ubox	--	--
Ca_23464	Ca_23464.1|Ca_LG_8:15774692-15779144|plus|	-3.98425	0.00704059	no	NA	NA	NA	15774692	15779144	+	seed linoleate 9S-lipoxygenase	PTHR11771 PTHR11771	IPR000907 IPR001024 IPR001246 IPR008976 IPR013819 IPR020833 IPR020834 IPR027433	PF00305 PF01477		PS00081 PS00711 PS50095 PS51393		Linoleate_9S-lipoxygenase_1	XM_004512205.1	#located_in_chloroplast|#located_in_cytoplasm	PLN02337-PLN02337|cd01751-PLAT_LH2|cl00011-PLAT|cl09510-Lipoxygenase	--	--
Ca_09460	Ca_09460.1|Ca_LG_4:18164167-18165882|plus|	3.29291	0.00705155	no	NA	NA	NA	18164167	18165882	+	c("glucan endo-1"	PTHR32227 PTHR32227	IPR000490 IPR012946 IPR013781 IPR017853	PF00332 PF07983	GO:0004553 GO:0005975		SSF51445	Glucan_endo-1,3-beta-glucosidase_13	XM_004497593.1	#has_catalytic_activity|#has_cation_binding|#has_hydrolase_activity,_hydrolyzing_O-glycosyl_compounds|#involved_in_carbohydrate_metabolic_process|#located_in_plasma_membrane	cl06842-X8|cl21706-Glyco_hydro_17|smart00768-X8	ERF	--
Ca_15850	Ca_15850.1|Ca_LG_6:7380558-7383587|plus|	2.38035	0.00717721	no	NA	NA	NA	7380558	7383587	+	probable pectinesterase/pectinesterase inhibitor 51-like [Glycine max]	PTHR31707 PTHR31707	IPR000070 IPR006501 IPR011050 IPR012334	PF01095 PF04043	GO:0004857 GO:0005618 GO:0030599 GO:0042545		SSF10114 SSF51126	Probable_pectinesterase/pectinesterase_inhibitor_64	XM_004503893.1	#has_enzyme_inhibitor_activity|#has_pectinesterase_activity|#involved_in_cell_wall_modification|#located_in_cell_wall|#located_in_chloroplast|#located_in_plasma_membrane	PLN02708-PLN02708|cd15798-PMEI-like_3|cl01911-Pectinesterase|cl04375-PMEI_like	--	--
Ca_19510	Ca_19510.1|Ca_LG_7:7730699-7731100|plus|	4.65982	0.00734182	no	NA	NA	NA	7730699	7731100	+	hypothetical protein							--	XM_004508100.1	--	cl00184-CAS_like	--	--
Ca_01772	Ca_01772.1|Ca_LG_1:27679643-27679946|minus|	-2.22186	0.00770559	no	NA	NA	NA	27679643	27679946	-	Defensin related		IPR003614 IPR008176	PF00304	GO:0006952	PS00940	SSF57095	Defensin-like_protein	XM_004487638.1	#involved_in_defense_response|#located_in_extracellular_region|#located_in_plasmodesma	cl11589-Knot1	--	--
Ca_03509	Ca_03509.1|Ca_LG_2:7553036-7554696|plus|	7.55989	0.00779258	no	NA	NA	NA	7553036	7554696	+	Peroxidase superfamily protein	PTHR31388 PTHR31388	IPR000823 IPR002016 IPR010255 IPR019794	PF00141	GO:0004601 GO:0006979 GO:0020037 GO:0055114	PS00436 PS50873	SSF48113	Peroxidase_4	XM_004490991.1	#has_heme_binding|#has_peroxidase_activity|#involved_in_oxidation-reduction_process|#involved_in_response_to_oxidative_stress|#located_in_Golgi_apparatus|#located_in_apoplast|#located_in_cell_wall|#located_in_cytosol|#located_in_extracellular_region	cd00693-secretory_peroxidase|cl00196-plant_peroxidase_like	--	--
Ca_06896	Ca_06896.1|Ca_LG_3:31495690-31496676|plus|	-2.44665	0.00803432	no	NA	NA	NA	31495690	31496676	+	uncharacterized protein LOC100780601 [Glycine max]							--	XM_004493348.1	--	cl00464-URO-D_CIMS_like	--	--
Ca_24349	Ca_24349.1|scaffold01231:5703-7283|minus|	2.2305	0.00803432	no	NA	NA	NA	5703	7283	-	UDP-Glycosyltransferase superfamily protein	PTHR11926 PTHR11926	IPR002213	PF00201	GO:0008152 GO:0016758	PS00375	SSF53756	Isoflavone_7-O-glucosyltransferase_1	XM_004515355.1	#has_transferase_activity,_transferring_hexosyl_groups|#involved_in_metabolic_process|#located_in_cytosol	PLN02992-PLN02992|cl21512-Glycos_transf_1	--	--
Ca_24783	Ca_24783.1|scaffold02136:7972-13201|plus|	3.71895	0.00803432	no	NA	NA	NA	7972	13201	+	glycerol-3-phosphate acyltransferase 6	PTHR31347 PTHR31347	IPR002123 IPR023214	PF01553 PF12710	GO:0008152 GO:0016746		SSF56784 SSF69593	Glycerol-3-phosphate_2-O-acyltransferase_4	XM_004513847.1	#involved_in_metabolic_process|#located_in_chloroplast	PLN02177-PLN02177|cd06551-LPLAT|cl17185-LPLAT|cl21460-HAD_like	--	--
Ca_24910	Ca_24910.1|scaffold02355:2455-7299|plus|	-1.81711	0.00803432	no	NA	NA	NA	2455	7299	+	ubiquitin ligase SINAT3	PTHR10315 PTHR10315	IPR001841 IPR004162 IPR008974 IPR013010 IPR013083 IPR013323 IPR018121	PF03145	GO:0004842 GO:0005515 GO:0005634 GO:0006511 GO:0007275 GO:0008270 GO:0016567	PS50089 PS51081	SSF49599 SSF57850	E3_ubiquitin-protein_ligase_SINAT5	XM_004517017.1	#has_ubiquitin-protein_ligase_activity|#has_zinc_ion_binding|#involved_in_multicellular_organismal_development|#involved_in_protein_ubiquitination|#involved_in_ubiquitin-dependent_protein_catabolic_process|#located_in_nucleus	cd00162-RING|cd03829-Sina|cl17238-RING|cl19105-Sina	--	--
Ca_16821	Ca_16821.1|Ca_LG_6:18988291-19001822|minus|	-2.55975	0.00805015	no	NA	NA	NA	18988291	19001822	-	probable phosphoinositide phosphatase SAC9-like [Glycine max]	PTHR11200 PTHR11200	IPR001202 IPR002013	PF00397 PF02383	GO:0005515 GO:0042578	PS01159 PS50020 PS50275	SSF51045	Probable_phosphoinositide_phosphatase_SAC9	XM_004505090.1	#has_phosphoric_ester_hydrolase_activity|#located_in_cytoplasm	cd00201-WW|cl00157-WW|cl11995-Syja_N	--	--
Ca_08752	Ca_08752.1|Ca_LG_4:9073753-9079828|plus|	-2.37028	0.00812194	no	NA	NA	NA	9073753	9079828	+	phosphoinositide phospholipase C 2-like [Glycine max]	PTHR10336 PTHR10336	IPR000008 IPR000909 IPR001192 IPR001711 IPR011992 IPR015359 IPR017946 IPR028384	PF00168 PF00387 PF00388 PF09279		PS50004 PS50007 PS50008	SSF47473	Phosphoinositide_phospholipase_C_7	XM_004490544.1	#has_phosphatidylinositol_phospholipase|#has_phospholipase|#has_phosphoric_diester_hydrolase_activity|#involved_in_intracellular_signal_transduction|#involved_in_lipid_metabolic_process|#involved_in_signal_transduction|#located_in_plasma_membrane	PLN02228-PLN02228|cd00275-C2_PLC_like|cl08538-EF-hand_like|cl14603-C2|cl14615-PI-PLCc_GDPD_SF	--	--
Ca_25663	Ca_25663.1|scaffold03549:9516-11478|plus|	-2.63489	0.00812194	no	NA	NA	NA	9516	11478	+	HVA22-like protein F	PTHR12300 PTHR12300	IPR004345	PF03134				HVA22-like_protein_f_	XM_004499936.1	--	cl19882-TB2_DP1_HVA22	--	--
Ca_20273	Ca_20273.1|Ca_LG_7:23028378-23032680|minus|	-3.43805	0.00833077	no	NA	NA	NA	23028378	23032680	-	LOB domain-containing protein 18	PTHR31529 PTHR31529	IPR004883	PF03195		PS50891		LOB_domain-containing_protein_30	XM_004510885.1	#located_in_nucleus	cl03929-DUF260	LBD	--
Ca_06882	Ca_06882.1|Ca_LG_3:31381829-31382265|minus|	-2.43757	0.00836831	no	NA	NA	NA	31381829	31382265	-	Methyltransferase-related protein							--	XM_004493099.1	--	cl00296-Peptidase_C1	--	--
Ca_03127	Ca_03127.1|Ca_LG_2:2946307-2947343|plus|	-1.97766	0.00853764	no	NA	NA	NA	2946307	2947343	+	nuclear transcription factor Y subunit B-2 [Glycine max]	PTHR11064 PTHR11064	IPR003956 IPR003957 IPR003958 IPR009072	PF00808	GO:0003677 GO:0005622 GO:0005634 GO:0006355 GO:0043565 GO:0046982	PS00685	SSF47113	Nuclear_transcription_factor_Y_subunit_B-3	XM_004491457.1	#has_DNA_binding|#has_sequence-specific_DNA_binding|#involved_in_regulation_of_transcription,_DNA-dependent|#located_in_intracellular|#located_in_nucleus	cl00074-H2A	NF-YB	--
Ca_08211	Ca_08211.1|Ca_LG_4:2463305-2474488|minus|	-1.55372	0.00878354	no	NA	NA	NA	2463305	2474488	-	preprotein translocase subunit SecA	PTHR30612	IPR000185 IPR011115 IPR011116 IPR011130 IPR014018 IPR020937 IPR027417	PF01043 PF07516 PF07517		PS01312 PS51196	SSF52540 SSF81767 SSF81886	Protein_translocase_subunit_SecA	XM_004495802.1	#has_ATP_binding|#involved_in_intracellular_protein_transport|#involved_in_protein_import|#involved_in_protein_targeting|#located_in_chloroplast|#located_in_chloroplast_envelope|#located_in_chloroplast_stroma|#located_in_membrane|#located_in_plasma_membrane	PRK12902-secA|cl03078-SecA_PP_bind|cl20338-SecA_SW	--	--
Ca_21990	Ca_21990.2|Ca_LG_7:43412391-43415630|plus|	5.03946	0.00888877	no	NA	NA	NA	43412391	43415630	+	Aluminium induced protein with YGL and LRDR motifs	PTHR11772	IPR024286	PF12481			SSF56235	Stem-specific_protein_TSJT1	XM_004508323.1	#located_in_cytoplasm|#located_in_plasma_membrane	cd01910-Wali7|cl00319-Gn_AT_II	--	--
Ca_12796	Ca_12796.1|Ca_LG_5:17074288-17078632|minus|	6.62545	0.00891297	no	NA	NA	NA	17074288	17078632	-	structural constituent of ribosome protein	PTHR31721 PTHR31721	IPR005134 IPR016804	PF03350				--	XM_004499884.1	#located_in_chloroplast|#located_in_chloroplast_envelope	cl01078-UPF0114	--	--
Ca_16965	Ca_16965.1|Ca_LG_6:20636087-20637518|plus|	-2.82139	0.00892185	no	NA	NA	NA	20636087	20637518	+	remorin-like [Glycine max]	PTHR31471	IPR005516	PF03763				--	XM_004505321.1	#located_in_cytoplasm	--	--	--
Ca_11725	Ca_11725.1|Ca_LG_4:52544515-52545261|minus|	-1.70054	0.0089691	no	NA	NA	NA	52544515	52545261	-	uncharacterized protein LOC100802817 [Glycine max]							--	XM_004490348.1	--	--	--	--
Ca_08838	Ca_08838.1|Ca_LG_4:10187557-10189555|plus|	-2.6537	0.00897746	no	NA	NA	NA	10187557	10189555	+	transcription factor SPATULA-like [Glycine max]	PTHR12565 PTHR12565	IPR011598	PF00010	GO:0046983	PS50888	SSF47459	Transcription_factor_SPATULA	XM_004498991.1	#involved_in_regulation_of_transcription,_DNA-dependent|#located_in_nucleus	cd00083-HLH|cl00081-HLH	bHLH	--
Ca_07649	Ca_07649.1|Ca_LG_3:38664205-38665057|plus|	-1.32369	0.00900851	no	NA	NA	NA	38664205	38665057	+	histone H2A 2	PTHR23430	IPR002119 IPR007125 IPR009072	PF00125	GO:0000786 GO:0003677 GO:0005634 GO:0006334 GO:0046982	PS00046	SSF47113	Histone_H2AX	XM_004494592.1	#has_DNA_binding|#involved_in_nucleosome_assembly|#located_in_nucleolus|#located_in_nucleosome|#located_in_nucleus	PLN00156-PLN00156|cd00074-H2A|cl00074-H2A	NF-YC	--
Ca_24342	Ca_24342.1|scaffold01219:22591-24605|plus|	-3.19693	0.00900851	no	NA	NA	NA	22591	24605	+	cinnamyl alcohol dehydrogenase 6	PTHR11695 PTHR11695	IPR002085 IPR002328 IPR011032 IPR013149 IPR013154 IPR016040 IPR020843	PF00107 PF08240	GO:0008270 GO:0016491 GO:0016747 GO:0055114	PS00059	SSF50129 SSF51735	Mannitol_dehydrogenase	XM_004512503.1	#has_nucleotide_binding|#has_oxidoreductase_activity|#has_transferase_activity,_transferring_acyl_groups_other_than_amino-acyl_groups|#has_zinc_ion_binding|#involved_in_oxidation-reduction_process|#located_in_cytoplasm	PLN02586-PLN02586|cd05283-CAD1|cl16912-MDR	--	--
Ca_25910	Ca_25910.1|scaffold03937:5304-9228|plus|	-1.87019	0.00900851	no	NA	NA	NA	5304	9228	+	receptor-like protein kinase 4	PTHR24420	IPR000719 IPR002290 IPR008271 IPR011009 IPR013320 IPR017441	PF00069	GO:0004672 GO:0004674 GO:0005524 GO:0006468 GO:0016772	PS00107 PS00108 PS50011	SSF56112	Probable_receptor-like_protein_kinase_At1g67000	XM_004498362.1	#has_ATP_binding|#has_protein_kinase_activity|#has_protein_serine/threonine_kinase_activity|#has_protein_tyrosine_kinase_activity|#has_transferase_activity,_transferring_phosphorus-containing_groups|#involved_in_protein_phosphorylation|#located_in_plasma_membrane	cl21453-PKc_like	--	--
Ca_21552	Ca_21552.1|Ca_LG_7:39133984-39135609|plus|	-2.41698	0.00966505	no	NA	NA	NA	39133984	39135609	+	receptor-like protein kinase 2-like [Glycine max]	PTHR23155	IPR001611 IPR003591 IPR025875	PF00560 PF12799 PF13504 PF13855	GO:0005515	PS51450	SSF52058	Plant_intracellular_Ras-group-related_LRR_protein_6_	XM_004507855.1	--	--	--	--
Ca_23493	Ca_23493.1|Ca_LG_8:16100131-16102913|plus|	4.41588	0.0097863	no	NA	NA	NA	16100131	16102913	+	ATP-binding cassette 14 n=1 Tax=Theobroma cacao RepID=UPI00042B6663	PTHR19241 PTHR19241	IPR003439 IPR003593 IPR013525 IPR017871 IPR027417	PF00005 PF01061	GO:0000166 GO:0005524 GO:0016020 GO:0016887 GO:0017111	PS00211 PS50893	SSF52540	ABC_transporter_G_family_member_9	XM_004512257.1	#has_ATP_binding|#has_ATPase_activity|#has_nucleoside-triphosphatase_activity|#has_nucleotide_binding|#located_in_membrane	PLN03211-PLN03211|cd03213-ABCG_EPDR|cl21455-ABC_ATPase|cl21474-ABC2_membrane	--	--
Ca_08164	Ca_08164.1|Ca_LG_4:2028425-2030883|plus|	2.24306	0.00979447	no	NA	NA	NA	2028425	2030883	+	c("glucan endo-1"	PTHR32227	IPR012946 IPR013781	PF07983	GO:0005975	PS51257		Glucan_endo-1,3-beta-glucosidase_1_	XM_004495566.1	--	cl06842-X8|smart00768-X8	--	--
Ca_06256	Ca_06256.1|Ca_LG_3:22875947-22876723|minus|	-5.4032	0.00984066	no	NA	NA	NA	22875947	22876723	-	c("Retrotransposon protein"		IPR001878	PF00098 PF14227	GO:0003676 GO:0008270	PS50158	SSF57756	Retrovirus-related_Pol_polyprotein_from_transposon_TNT_1-94	AP010327.1	#has_nucleic_acid_binding|#has_zinc_ion_binding|#located_in_nucleus	cl15874-UBN2|cl22700-zf-CCHC	--	--
Ca_17035	Ca_17035.1|Ca_LG_6:21451277-21455047|minus|	-6.38409	0.00993067	no	NA	NA	NA	21451277	21455047	-	beta glucosidase 41	PTHR10353	IPR001360 IPR013781 IPR017853 IPR018120	PF00232	GO:0004553 GO:0005975	PS00653	SSF51445	Beta-glucosidase_40	XM_004505364.1	#has_catalytic_activity|#has_cation_binding|#has_hydrolase_activity,_hydrolyzing_O-glycosyl_compounds|#involved_in_carbohydrate_metabolic_process|#located_in_apoplast|#located_in_chloroplast|#located_in_extracellular_region	cl01046-BglB	C2H2	--
Ca_01857	Ca_01857.1|Ca_LG_1:28979233-28980259|minus|	6.12891	0.0100313	no	NA	NA	NA	28979233	28980259	-	flowering promoting factor 1							Flowering-promoting_factor_1-like_protein_1	XM_004487805.1	#located_in_nucleus	--	--	--
Ca_16373	Ca_16373.1|Ca_LG_6:13644778-13645315|minus|	1.45705	0.0101013	no	NA	NA	NA	13644778	13645315	-	nuclear transport factor 2A	PTHR12612	IPR002075 IPR018222	PF02136	GO:0005622 GO:0006810	PS50177	SSF54427	Nuclear_transport_factor_2	XM_004504349.1	#involved_in_transport|#located_in_cytoplasm	cd00780-NTF2|cl09109-NTF2_like	--	--
Ca_06316	Ca_06316.1|Ca_LG_3:23883222-23887927|plus|	-1.59456	0.0103396	no	NA	NA	NA	23883222	23887927	+	protein kinase family protein	PTHR24347 PTHR24347	IPR000719 IPR002290 IPR004041 IPR008271 IPR011009 IPR017441 IPR018451 IPR020636	PF00069 PF03822	GO:0004672 GO:0004674 GO:0005524	PS00107 PS00108 PS50011 PS50816	SSF56112	CBL-interacting_serine/threonine-protein_kinase_15	XM_004492487.1	#has_ATP_binding|#has_protein_kinase_activity|#has_protein_serine/threonine_kinase_activity|#has_transferase_activity,_transferring_phosphorus-containing_groups|#involved_in_protein_phosphorylation|#involved_in_signal_transduction|#located_in_plasma_membrane	cd12195-CIPK_C|cd14663-STKc_SnRK3|cl17070-AMPKA_C_like|cl21453-PKc_like|smart00220-S_TKc	--	--
Ca_20556	Ca_20556.1|Ca_LG_7:27545711-27551860|plus|	-2.67913	0.0103714	no	NA	NA	NA	27545711	27551860	+	GDSL-like Lipase/Acylhydrolase superfamily protein	PTHR22835 PTHR22835	IPR001087 IPR008265 IPR013831	PF00657	GO:0006629 GO:0016298 GO:0016787 GO:0016788	PS01098		GDSL_esterase/lipase_EXL3	XM_004509327.1	#has_hydrolase_activity,_acting_on_ester_bonds|#has_lipase_activity|#involved_in_lipid_metabolic_process|#located_in_extracellular_region	cd01837-SGNH_plant_lipase_like|cl01053-SGNH_hydrolase	--	--
Ca_10012	Ca_10012.1|Ca_LG_4:24751880-24756187|minus|	2.79145	0.0105324	no	NA	NA	NA	24751880	24756187	-	lactate/malate dehydrogenase family protein	PTHR23382 PTHR23382	IPR001236 IPR001252 IPR010945 IPR011273 IPR015955 IPR016040 IPR022383	PF00056 PF02866	GO:0003824 GO:0005975 GO:0006108 GO:0016491 GO:0016615 GO:0016616 GO:0046554	PS00068	SSF51735 SSF56327	Malate_dehydrogenase_[NADP]_2,_chloroplastic	XM_004496078.1	#has_catalytic_activity|#has_malate_dehydrogenase_(NADP+)_activity|#has_malate_dehydrogenase_activity|#has_nucleotide_binding|#has_oxidoreductase_activity|#has_oxidoreductase_activity,_acting_on_the_CH-OH_group_of_donors,_NAD_or_NADP_as_acceptor|#involved_in_carbohydrate_metabolic_process|#involved_in_cellular_carbohydrate_metabolic_process|#involved_in_malate_metabolic_process|#involved_in_oxida…	PLN00112-PLN00112|cd01338-MDH_choloroplast_like|cl21454-SDR	--	--
Ca_04381	Ca_04381.1|Ca_LG_2:23870260-23873764|minus|	-1.46546	0.010553	no	NA	NA	NA	23870260	23873764	-	protein kinase 2B	PTHR24420	IPR000719 IPR001245 IPR008271 IPR011009 IPR013320 IPR017441	PF07714	GO:0004672 GO:0004674 GO:0005524 GO:0006468 GO:0016772	PS00107 PS00108 PS50011	SSF56112	Protein_kinase_2A,_chloroplastic	XM_004489956.1	#has_ATP_binding|#has_protein_kinase_activity|#has_protein_serine/threonine_kinase_activity|#has_transferase_activity,_transferring_phosphorus-containing_groups|#involved_in_protein_phosphorylation	cd14066-STKc_IRAK|cl21453-PKc_like|smart00221-STYKc	--	--
Ca_04435	Ca_04435.1|Ca_LG_2:24883165-24885882|minus|	2.50181	0.010553	no	NA	NA	NA	24883165	24885882	-	Regulator of chromosome condensation (RCC1) family protein	PTHR22870 PTHR22870	IPR000408 IPR009091	PF00415		PS00626 PS50012	SSF50985	Ultraviolet-B_receptor_UVR8	XM_004489912.1	#located_in_cytoplasm	cl08266-RCC1|cl16296-RCC1_2	--	--
Ca_07929	Ca_07929.1|Ca_LG_3:41294314-41295267|minus|	-2.39849	0.010553	no	NA	NA	NA	41294314	41295267	-	uncharacterized protein LOC102660779 [Glycine max]							--	XM_004494861.1	#located_in_nucleus	--	--	--
Ca_14251	Ca_14251.1|Ca_LG_5:36220788-36221510|plus|	-3.06053	0.0105859	no	NA	NA	NA	36220788	36221510	+	Unknown protein							--	XM_004502678.1	--	--	--	--
Ca_07828	Ca_07828.1|Ca_LG_3:40350982-40352116|plus|	-2.23955	0.0110913	no	NA	NA	NA	40350982	40352116	+	uncharacterized protein LOC100785438 [Glycine max]	PTHR31972	IPR008586	PF05910				--	XM_004494088.1	#located_in_chloroplast	cl05466-DUF868	--	--
Ca_15443	Ca_15443.1|Ca_LG_6:3011327-3016474|plus|	-3.05234	0.0110913	no	NA	NA	NA	3011327	3016474	+	MACPF domain protein	PTHR32413 PTHR32413	IPR020864	PF01823		PS51412		MACPF_domain-containing_protein_At1g14780	XM_004503285.1	#located_in_nucleus	cl02616-MACPF	--	--
Ca_24871	Ca_24871.1|scaffold02298:36806-37027|plus|	-3.11481	0.0110913	no	NA	NA	NA	36806	37027	+	P-loop containing nucleoside triphosphate hydrolases superfamily protein	PTHR23070 PTHR23070						--	XM_004489431.1	#has_ATP_binding|#has_nucleoside-triphosphatase_activity|#has_nucleotide_binding|#has_protein_modification_of_type_N-terminal_protein_myristoylation|#located_in_plasma_membrane	--	--	--
Ca_10190	Ca_10190.1|Ca_LG_4:27002489-27005422|plus|	2.15065	0.0117225	no	NA	NA	NA	27002489	27005422	+	RAN binding protein 1	PTHR23138 PTHR23138	IPR000156 IPR011993	PF00638	GO:0046907	PS50196	SSF50729	Ran-binding_protein_1_homolog_b	XM_004496365.1	#involved_in_intracellular_transport|#located_in_nucleus	cd13179-RanBD_RanBP1|cl17171-PH-like	--	--
Ca_27532	Ca_27532.1|scaffold09006:2684-3280|minus|	-2.72802	0.0118807	no	NA	NA	NA	2684	3280	-	RING/U-box superfamily protein	PTHR12183	IPR001841 IPR013083	PF13920	GO:0005515 GO:0008270	PS50089	SSF57850	--	XM_004499462.1	#has_zinc_ion_binding|#located_in_nucleus	cd00162-RING|cl17238-RING	--	--
Ca_10447	Ca_10447.1|Ca_LG_4:30096484-30098748|plus|	-4.98117	0.012209	no	NA	NA	NA	30096484	30098748	+	Protein UNIFOLIATA n=1 Tax=Pisum sativum RepID=UNI_PEA		IPR002910	PF01698	GO:0003677 GO:0006355			Floricaula_protein	XM_004501703.1	#involved_in_regulation_of_transcription,_DNA-dependent|#located_in_nucleus	cl03318-FLO_LFY	LFY	--
Ca_04620	Ca_04620.1|Ca_LG_2:27468627-27468820|plus|	-5.75277	0.0123512	no	NA	NA	NA	27468627	27468820	+	Unknown protein							Arabinogalactan_peptide_14	XM_004489648.1	#located_in_plasma_membrane	--	--	--
Ca_07905	Ca_07905.1|Ca_LG_3:41056707-41059890|minus|	6.57774	0.0125053	no	NA	NA	NA	41056707	41059890	-	aluminum-activated malate transporter 1	PTHR31086 PTHR31086	IPR020966	PF11744	GO:0015743			Aluminum-activated_malate_transporter_8	XM_004494860.1	#involved_in_response_to_aluminum_ion	cl19401-FUSC_2	--	--
Ca_02575	Ca_02575.1|Ca_LG_1:37055087-37056260|minus|	1.67462	0.0128372	no	NA	NA	NA	37055087	37056260	-	FKBP-like peptidyl-prolyl cis-trans isomerase family protein	PTHR10516 PTHR10516	IPR001179 IPR023566	PF00254	GO:0006457	PS50059	SSF54534	Peptidyl-prolyl_cis-trans_isomerase_FKBP12	XM_004485548.1	#involved_in_protein_folding|#located_in_cytoplasm|#located_in_cytosol	cl19519-FKBP_C	--	--
Ca_18324	Ca_18324.1|Ca_LG_6:44820495-44826388|minus|	5.04019	0.0128372	no	NA	NA	NA	44820495	44826388	-	fatty acyl-CoA reductase 3-like [Glycine max]	PTHR11011 PTHR11011	IPR013120 IPR016040 IPR026055	PF03015 PF07993	GO:0080019		SSF51735	Alcohol-forming_fatty_acyl-CoA_reductase	XM_004506095.1	#has_nucleotide_binding|#has_oxidoreductase_activity,_acting_on_the_aldehyde_or_oxo_group_of_donors,_NAD_or_NADP_as_acceptor|#involved_in_oxidation-reduction_process|#involved_in_wax_biosynthetic_process	PLN02996-PLN02996|cd09071-FAR_C|cl03838-FAR_C|cl21454-SDR	--	--
Ca_23337	Ca_23337.1|Ca_LG_8:14348973-14351991|plus|	-3.79021	0.0128372	no	NA	NA	NA	14348973	14351991	+	nucleobase-ascorbate transporter 7	PTHR11119 PTHR11119	IPR006043	PF00860	GO:0005215 GO:0006810 GO:0016020 GO:0055085			Nucleobase-ascorbate_transporter_2	XM_004512079.1	#has_transporter_activity|#involved_in_transmembrane_transport|#involved_in_transport|#located_in_membrane	cl19250-Sulfate_transp	--	--
Ca_18068	Ca_18068.1|Ca_LG_6:39211137-39213596|minus|	2.05622	0.0129221	no	NA	NA	NA	39211137	39213596	-	Cytochrome P450 superfamily protein	PTHR24298 PTHR24298	IPR001128 IPR002401 IPR017972	PF00067	GO:0005506 GO:0016705 GO:0020037 GO:0055114	PS00086	SSF48264	Geraniol_8-hydroxylase	AJ249799.1	#has_electron_carrier_activity|#has_heme_binding|#has_iron_ion_binding|#has_oxidoreductase_activity,_acting_on_paired_donors,_with_incorporation_or_reduction_of_molecular_oxygen|#involved_in_oxidation-reduction_process	cl12078-p450	--	--
Ca_23060	Ca_23060.1|Ca_LG_8:10912288-10915636|minus|	-5.05817	0.013011	no	NA	NA	NA	10912288	10915636	-	rac-like GTP-binding protein 7-like [Glycine max]	PTHR24072 PTHR24072	IPR001806 IPR002041 IPR003578 IPR003579 IPR005225 IPR020849 IPR027417	PF00071	GO:0003924 GO:0005525 GO:0005622 GO:0006184 GO:0006886 GO:0006913 GO:0007165	PS51420	SSF52540	Rac-like_GTP-binding_protein_ARAC7	XM_004512951.1	#has_GTP_binding|#has_GTPase_activity|#involved_in_GTP_catabolic_process|#involved_in_protein_transport|#involved_in_signal_transduction|#involved_in_small_GTPase_mediated_signal_transduction|#located_in_extracellular_region|#located_in_intracellular|#located_in_membrane	cd04133-Rop_like|cl21455-ABC_ATPase	--	--
Ca_25990	Ca_25990.1|scaffold04050:5109-5444|minus|	3.84274	0.013011	no	NA	NA	NA	5109	5444	-	flowering promoting factor 1							Flowering-promoting_factor_1	XM_004508216.1	#located_in_nucleus	--	--	--
Ca_10339	Ca_10339.1|Ca_LG_4:28835741-28838710|minus|	-2.14519	0.0140003	no	NA	NA	NA	28835741	28838710	-	Regulator of chromosome condensation (RCC1) family protein	PTHR22870 PTHR22870	IPR000408 IPR009091	PF00415		PS00626 PS50012	SSF50985	Ultraviolet-B_receptor_UVR8	XM_004498407.1	#located_in_plasma_membrane	cl08266-RCC1|cl16296-RCC1_2	--	--
Ca_25497	Ca_25497.1|scaffold03297:1-1923|plus|	-1.75985	0.0141011	no	NA	NA	NA	1	1923	+	senescence-associated protein							Protein_TAR1_	XM_004516205.1	--	--	--	--
Ca_09140	Ca_09140.1|Ca_LG_4:13794203-13798340|plus|	-4.23443	0.0142002	no	NA	NA	NA	13794203	13798340	+	microtubule-associated protein 65-9	PTHR19321 PTHR19321	IPR007145	PF03999	GO:0000226 GO:0000910 GO:0008017			65-kDa_microtubule-associated_protein_3_	XM_004495368.1	--	--	--	--
Ca_06138	Ca_06138.1|Ca_LG_3:20564384-20569586|minus|	-1.93292	0.0142861	no	NA	NA	NA	20564384	20569586	-	monodehydroascorbate reductase 4	PTHR22912 PTHR22912	IPR001327 IPR013027 IPR016156 IPR018247 IPR023753	PF00070 PF07992	GO:0016491 GO:0050660 GO:0055114	PS00018	SSF51905 SSF55424	Probable_monodehydroascorbate_reductase,_cytoplasmic_isoform_2	XM_004491677.1	#has_electron_carrier_activity|#has_flavin_adenine_dinucleotide_binding|#has_oxidoreductase_activity|#involved_in_oxidation-reduction_process|#located_in_chloroplast_envelope|#located_in_cytoplasm	cl21454-SDR	--	--
Ca_02960	Ca_02960.1|Ca_LG_2:1493189-1494298|plus|	3.64405	0.0144903	no	NA	NA	NA	1493189	1494298	+	Heavy metal transport/detoxification superfamily protein	PTHR22814 PTHR22814	IPR006121	PF00403	GO:0030001 GO:0046872	PS50846	SSF55008	Heavy_metal-associated_isoprenylated_plant_protein_26	XM_004503986.1	#has_metal_ion_binding|#involved_in_metal_ion_transport|#located_in_cytoplasm	cd00371-HMA|cl00207-HMA	--	--
Ca_02384	Ca_02384.1|Ca_LG_1:35330748-35333910|plus|	4.23643	0.0145533	no	NA	NA	NA	35330748	35333910	+	28 kDa heat- and acid-stable phosphoprotein-like protein	PTHR22055	IPR019380	PF10252				28_kDa_heat-_and_acid-stable_phosphoprotein	XM_004485795.1	#located_in_cytosol|#located_in_nucleus	cl10936-PP28	--	--
Ca_11775	Ca_11775.1|Ca_LG_4:53272649-53276877|plus|	-2.30528	0.0145533	no	NA	NA	NA	53272649	53276877	+	MYB transcription factor MYB118 isoform X1 [Glycine max]	PTHR12802 PTHR12802	IPR001005 IPR006447 IPR009057 IPR017930	PF00249	GO:0003677 GO:0003682	PS51294	SSF46689	Transcription_factor_ASG4	XM_004497398.1	#has_DNA_binding|#located_in_nucleus	cd00167-SANT|cl21498-SANT	MYB-related	--
Ca_10836	Ca_10836.1|Ca_LG_4:34441037-34445362|minus|	-1.98349	0.0146977	no	NA	NA	NA	34441037	34445362	-	Ankyrin repeat family protein	PTHR24177 PTHR24177	IPR002110 IPR020683 IPR026961 IPR027001 IPR027002	PF00023 PF12796 PF13962	GO:0005515	PS50088 PS50297	SSF48403	Ankyrin_repeat-containing_protein_At2g01680	XM_004498197.1	#located_in_plasma_membrane	cd00204-ANK|cl02529-ANK|cl16503-PGG	--	--
Ca_12115	Ca_12115.1|Ca_LG_5:3925238-3930403|plus|	-1.83872	0.0146977	no	NA	NA	NA	3925238	3930403	+	zinc induced facilitator-like 1	PTHR24003 PTHR24003	IPR016196				SSF10347	Protein_ZINC_INDUCED_FACILITATOR-LIKE_1_	XM_004515389.1	--	--	--	--
Ca_15003	Ca_15003.1|Ca_LG_5:43708765-43726820|plus|	2.71048	0.0146977	no	NA	NA	NA	43708765	43726820	+	Rhamnogalacturonate lyase family protein	PTHR32018 PTHR32018	IPR001293 IPR008979 IPR010325 IPR011013 IPR013784 IPR014766	PF06045 PF14683 PF14686	GO:0003824 GO:0005975 GO:0008270 GO:0030246	PS50145	SSF49452 SSF49785 SSF74650	Rhamnogalacturonate_lyase	XM_003603662.1	#has_carbohydrate_binding|#has_catalytic_activity|#involved_in_carbohydrate_metabolic_process|#located_in_extracellular_region	cd10316-RGL4_M|cd10317-RGL4_C|cd10320-RGL4_N|cl15675-RGL4_N|cl15687-RGL4_C|cl21470-Peptidase_M14NE-CP-C_like	--	--
Ca_02151	Ca_02151.1|Ca_LG_1:32842056-32847657|plus|	-1.43747	0.0147371	no	NA	NA	NA	32842056	32847657	+	nuclear transcription factor Y subunit B-7-like [Glycine max]	PTHR31696 PTHR31696	IPR003958 IPR006460 IPR009072	PF00808 PF04759	GO:0005622 GO:0043565 GO:0046982		SSF47113	Protein_Dr1_homolog	XM_004488295.1	#located_in_nucleus	cl00074-H2A|cl00474-PAP2_like|cl04729-DUF617	--	--
Ca_03470	Ca_03470.1|Ca_LG_2:7088383-7094457|plus|	-2.65357	0.0147371	no	NA	NA	NA	7088383	7094457	+	sucrose synthase 6	PTHR12526 PTHR12526	IPR000368 IPR001296 IPR012820	PF00534 PF00862	GO:0005985 GO:0009058 GO:0016157		SSF53756	Sucrose_synthase	XM_003616118.1	#involved_in_response_to_cadmium_ion|#located_in_cytosol	PLN00142-PLN00142|cd03800-GT1_Sucrose_synthase|cl10013-Glycosyltransferase_GTB_type	--	--
Ca_09317	Ca_09317.1|Ca_LG_4:16172877-16174458|plus|	-3.84144	0.0147371	no	NA	NA	NA	16172877	16174458	+	Syntaxin/t-SNARE family protein		IPR010989 IPR015260	PF09177	GO:0016020 GO:0016192 GO:0048193		SSF47661	Syntaxin-61	XM_004498956.1	#involved_in_Golgi_vesicle_transport|#involved_in_vesicle-mediated_transport|#located_in_Golgi_apparatus|#located_in_membrane|#located_in_nucleus	cl07702-Syntaxin-6_N	--	--
Ca_22103	Ca_22103.1|Ca_LG_7:44441101-44444214|plus|	2.5457	0.0149737	no	NA	NA	NA	44441101	44444214	+	Protein kinase superfamily protein	PTHR24420	IPR000719 IPR001245 IPR008271 IPR011009 IPR017441	PF07714	GO:0004672 GO:0004674 GO:0005524 GO:0006468 GO:0016772	PS00107 PS00108 PS50011	SSF56112	Probable_receptor-like_protein_kinase_At5g15080	XM_004508410.1	#has_ATP_binding|#has_protein_kinase_activity|#has_protein_modification_of_type_N-terminal_protein_myristoylation|#has_protein_serine/threonine_kinase_activity|#has_transferase_activity,_transferring_phosphorus-containing_groups|#involved_in_protein_phosphorylation|#located_in_plasma_membrane	cd14066-STKc_IRAK|cl21453-PKc_like|smart00219-TyrKc	--	--
Ca_21714	Ca_21714.1|Ca_LG_7:40717704-40720470|minus|	4.52167	0.0153308	no	NA	NA	NA	40717704	40720470	-	RING/FYVE/PHD-type zinc finger family protein	PTHR15629 PTHR15629	IPR000306 IPR007461 IPR011011 IPR013083 IPR017455	PF01363 PF04366	GO:0046872	PS50178	SSF57903	SH3_domain-containing_protein_PJ696.02	XM_004507984.1	#has_metal_ion_binding|#located_in_cytoplasm	cd00065-FYVE|cd11526-SYLF_FYVE|cl01109-SYLF|cl17764-FYVE	--	--
Ca_05349	Ca_05349.1|Ca_LG_3:4675921-4684033|minus|	2.35342	0.0154683	no	NA	NA	NA	4675921	4684033	-	FKBP-like peptidyl-prolyl cis-trans isomerase family protein	PTHR10516 PTHR10516	IPR001179 IPR001878 IPR011990 IPR013026 IPR013105 IPR019734 IPR023566	PF00254 PF07719 PF13414	GO:0003676	PS50005 PS50059 PS50158 PS50293	SSF48452 SSF54534 SSF57756	Peptidyl-prolyl_cis-trans_isomerase_FKBP65	XM_004492213.1	#involved_in_protein_folding|#located_in_nucleus|#located_in_vacuole	COG0545-FkpA|cd00189-TPR|cl19519-FKBP_C|cl22441-TPR	--	--
Ca_07680	Ca_07680.1|Ca_LG_3:38943809-38946760|minus|	1.35461	0.015532	no	NA	NA	NA	38943809	38946760	-	aldo/keto reductase family oxidoreductase	PTHR11732 PTHR11732	IPR001395 IPR023210	PF00248			SSF51430	Probable_aldo-keto_reductase_1	XM_004494635.1	#located_in_chloroplast_envelope|#located_in_cytoplasm|#located_in_plasma_membrane	TIGR01293-potassium_channel_beta_2_subunit|cd06660-Aldo_ket_red|cl00470-Aldo_ket_red	--	--
Ca_01742	Ca_01742.1|Ca_LG_1:27276609-27304772|plus|	4.08858	0.0155621	no	NA	NA	NA	27276609	27304772	+	callose synthase 1	PTHR12741 PTHR12741	IPR003440 IPR026899 IPR026953	PF02364 PF14288	GO:0000148 GO:0003843 GO:0006075 GO:0016020			Putative_callose_synthase_8	XM_004488634.1	#has_1,3-beta-D-glucan_synthase_activity|#involved_in_(1->3)-beta-D-glucan_biosynthetic_process|#located_in_1,3-beta-D-glucan_synthase_complex|#located_in_membrane|#located_in_plasma_membrane	cl15642-Glucan_synthase|cl16776-FKS1_dom1	MYB-related	--
Ca_03863	Ca_03863.1|Ca_LG_2:12914188-12915478|plus|	-2.65888	0.0155621	no	NA	NA	NA	12914188	12915478	+	remorin-like [Glycine max]	PTHR31471	IPR005516	PF03763				--	XM_004490097.1	#located_in_cytoplasm	--	--	--
Ca_12445	Ca_12445.1|Ca_LG_5:9889973-9893560|minus|	1.62175	0.0155621	no	NA	NA	NA	9889973	9893560	-	uncharacterized protein LOC100527694 isoform X1 [Glycine max]	PTHR21385 PTHR21385	IPR007087 IPR026939		GO:0046872	PS00028 PS50157	SSF11835	--	BT148523.1	#has_zinc_ion_binding|#located_in_intracellular|#located_in_mitochondrion	--	C2H2	--
Ca_15539	Ca_15539.1|Ca_LG_6:4125257-4127847|minus|	2.99203	0.0155956	no	NA	NA	NA	4125257	4127847	-	probable polygalacturonase [Glycine max]	PTHR31339 PTHR31339	IPR000743 IPR011050 IPR012334	PF00295	GO:0004650 GO:0005975		SSF51126	Probable_polygalacturonase	XM_004503623.1	#has_polygalacturonase_activity|#involved_in_carbohydrate_metabolic_process|#located_in_extracellular_region	COG5434-PGU1|cl19188-Pectate_lyase_3	--	--
Ca_01170	Ca_01170.1|Ca_LG_1:14912611-14913144|plus|	-2.50925	0.0156179	no	NA	NA	NA	14912611	14913144	+	SKP1-like 14	PTHR11165	IPR001232 IPR011333 IPR016072 IPR016073 IPR016897	PF01466 PF03931	GO:0006511		SSF54695 SSF81382	SKP1-like_protein_14	XM_004488709.1	#involved_in_ubiquitin-dependent_protein_catabolic_process|#located_in_nucleus	COG5201-SKP1|cl02518-BTB|cl03226-Skp1	--	--
Ca_12303	Ca_12303.1|Ca_LG_5:7414393-7419839|minus|	-1.9858	0.0158286	no	NA	NA	NA	7414393	7419839	-	asparagine synthetase 3	PTHR11772	IPR000583 IPR001962 IPR006426 IPR014729 IPR017932	PF00733 PF13537	GO:0004066 GO:0006529 GO:0008152	PS51278	SSF52402 SSF56235	Asparagine_synthetase_B_[glutamine-hydrolyzing]	XM_004500222.1	#has_asparagine_synthase_(glutamine-hydrolyzing)_activity|#located_in_cytoplasm	PLN02549-PLN02549|cd00712-AsnB|cd01991-Asn_Synthase_B_C|cl00292-AANH_like|cl00319-Gn_AT_II	--	--
Ca_20432	Ca_20432.1|Ca_LG_7:25657398-25661874|minus|	3.0513	0.0161205	no	NA	NA	NA	25657398	25661874	-	diacylglycerol acyltransferase family	PTHR12317 PTHR12317	IPR007130	PF03982	GO:0016747			Diacylglycerol_O-acyltransferase_2	XM_004509418.1	#located_in_chloroplast	cd07987-LPLAT_MGAT-like|cl17185-LPLAT	--	--
Ca_23274	Ca_23274.1|Ca_LG_8:13794492-13800760|minus|	-2.09559	0.0161982	no	NA	NA	NA	13794492	13800760	-	4-phosphopantetheine adenylyltransferase	PTHR10695 PTHR10695	IPR014729				SSF52374	Phosphopantetheine_adenylyltransferase	JX065074.1	#has_ATP_binding|#has_catalytic_activity|#has_dephospho-CoA_kinase_activity|#has_nucleotidyltransferase_activity|#involved_in_biosynthetic_process|#involved_in_coenzyme_A_biosynthetic_process|#located_in_cytosol|#located_in_nucleus	cl00015-nt_trans	--	--
Ca_02413	Ca_02413.1|Ca_LG_1:35593727-35594194|minus|	2.84739	0.0165194	no	NA	NA	NA	35593727	35594194	-	U-box domain-containing protein 7-like [Glycine max]		IPR011989 IPR016024		GO:0005488		SSF48371	--	XM_004485830.1	--	cd00020-ARM|cl22454-ARM	--	--
Ca_19387	Ca_19387.1|Ca_LG_7:5945483-5947807|plus|	-4.13509	0.0165194	no	NA	NA	NA	5945483	5947807	+	Clavaminate synthase-like protein n=1 Tax=Dacryopinax sp. (strain DJM 731) RepID=M5G1S5_DACSP	PTHR10209 PTHR10209	IPR027443				SSF51197	--	XM_004511072.1	--	COG3491-PcbC	--	--
Ca_13674	Ca_13674.1|Ca_LG_5:30230355-30232679|plus|	-3.03987	0.0167337	no	NA	NA	NA	30230355	30232679	+	nudix hydrolase homolog 2	PTHR13994 PTHR13994	IPR000086 IPR003293 IPR015797 IPR020084	PF00293	GO:0016787	PS00893 PS51462	SSF55811	Nudix_hydrolase_2	XM_004502132.1	#has_hydrolase_activity|#located_in_cytosol	cl00447-Nudix_Hydrolase	C3H	--
Ca_10189	Ca_10189.1|Ca_LG_4:26991033-26994370|minus|	2.09728	0.0167979	no	NA	NA	NA	26991033	26994370	-	serine carboxypeptidase-like 27	PTHR11802 PTHR11802	IPR001563 IPR018202	PF00450	GO:0004185 GO:0006508	PS00131 PS00560	SSF53474	Serine_carboxypeptidase_2	XM_004496235.1	#has_serine-type_carboxypeptidase_activity|#involved_in_proteolysis|#located_in_extracellular_region|#located_in_vacuole	cl08270-Peptidase_S10	--	--
Ca_22940	Ca_22940.1|Ca_LG_8:8917874-8920012|plus|	-3.51888	0.0172253	no	NA	NA	NA	8917874	8920012	+	exocyst subunit exo70 family protein C2	PTHR12542 PTHR12542	IPR004140 IPR016159	PF03081	GO:0000145 GO:0006887		SSF74788	Exocyst_complex_component_EXO70B1	XM_004516331.1	#involved_in_exocytosis|#located_in_exocyst|#located_in_nucleus	cl03878-Exo70|cl19102-HCP_like	--	--
Ca_13821	Ca_13821.1|Ca_LG_5:31686501-31687615|minus|	3.36836	0.0174309	no	NA	NA	NA	31686501	31687615	-	photosystem II core complex family psbY protein		IPR009388	PF06298	GO:0009523 GO:0015979 GO:0016021 GO:0030145			Photosystem_II_core_complex_proteins_psbY,_chloroplastic	XM_004502294.1	#has_manganese_ion_binding|#involved_in_photosynthesis|#located_in_chloroplast|#located_in_chloroplast_thylakoid_membrane|#located_in_integral_to_membrane|#located_in_photosystem_II	PLN00063-PLN00063|cl22473-PsbY	--	--
Ca_11457	Ca_11457.1|Ca_LG_4:46976637-46977664|plus|	2.70881	0.0176809	no	NA	NA	NA	46976637	46977664	+	GCN5-related N-acetyltransferase n=2 Tax=Burkholderia RepID=R4WS52_9BURK	PTHR10545 PTHR10545	IPR000182 IPR016181	PF00583	GO:0008080	PS51186	SSF55729	Probable_acetyltransferase_NATA1-like	XM_004514545.1	#has_N-acetyltransferase_activity|#located_in_chloroplast|#located_in_cytoplasm	COG0456-RimI|cd04301-NAT_SF|cl17182-NAT_SF	--	--
Ca_18380	Ca_18380.1|Ca_LG_6:45855127-45859544|plus|	1.99095	0.0176876	no	NA	NA	NA	45855127	45859544	+	RING/U-box superfamily protein	PTHR23012 PTHR23012	IPR011016 IPR013083	PF12906	GO:0008270	PS51292	SSF57850	--	XM_004505930.1	#has_zinc_ion_binding|#located_in_cytoplasm	cl17238-RING|smart00744-RINGv	--	--
Ca_18026	Ca_18026.1|Ca_LG_6:38438196-38439478|minus|	-4.52418	0.0177959	no	NA	NA	NA	38438196	38439478	-	Late embryogenesis abundant protein (LEA) family protein							Late_embryogenesis_abundant_protein_1	XM_004506844.1	#located_in_nucleus	--	--	--
Ca_23018	Ca_23018.1|Ca_LG_8:10353095-10354561|plus|	-2.30539	0.0177959	no	NA	NA	NA	10353095	10354561	+	heat shock transcription factor C1	PTHR10015 PTHR10015	IPR000232 IPR011991 IPR027709 IPR027725	PF00447	GO:0003700 GO:0005634 GO:0006355 GO:0009408 GO:0043565	PS00434	SSF46785	Heat_stress_transcription_factor_C-1	XM_004512917.1	#has_sequence-specific_DNA_binding|#has_sequence-specific_DNA_binding_transcription_factor_activity|#involved_in_regulation_of_transcription,_DNA-dependent|#located_in_nucleus	cl12113-HSF_DNA-bind	HSF	--
Ca_23439	Ca_23439.1|Ca_LG_8:15452092-15454712|minus|	-1.34099	0.0177959	no	NA	NA	NA	15452092	15454712	-	unknown protein							--	XR_190275.1	#located_in_mitochondrion	--	--	--
Ca_04860	Ca_04860.1|Ca_LG_2:30627699-30629750|plus|	1.69891	0.0178003	no	NA	NA	NA	30627699	30629750	+	uncharacterized protein LOC100800000 isoform X8 [Glycine max]	PTHR31515						--	XM_004489320.1	#located_in_mitochondrion	cl22613-Spore_YpjB	--	--
Ca_14921	Ca_14921.1|Ca_LG_5:42808587-42809691|minus|	-3.37399	0.0180889	no	NA	NA	NA	42808587	42809691	-	Mitochondrial substrate carrier family protein	PTHR24089 PTHR24089	IPR002067 IPR018108 IPR023395	PF00153	GO:0055085	PS50920	SSF10350	Mitochondrial_uncoupling_protein_4	XM_004501570.1	#involved_in_transmembrane_transport|#involved_in_transport|#located_in_mitochondrion	PTZ00169-PTZ00169|cl02813-Mito_carr	--	--
Ca_18663	Ca_18663.1|Ca_LG_6:50372700-50375672|minus|	-7.14912	0.0182738	no	NA	NA	NA	50372700	50375672	-	beta glucosidase 13	PTHR10353	IPR001360 IPR013781 IPR017853	PF00232	GO:0004553 GO:0005975		SSF51445	Cyanogenic_beta-glucosidase_(Fragment)	XM_004507081.1	#has_catalytic_activity|#has_cation_binding|#has_hydrolase_activity,_hydrolyzing_O-glycosyl_compounds|#involved_in_carbohydrate_metabolic_process|#located_in_Golgi_apparatus|#located_in_extracellular_region	cl01046-BglB	--	--
Ca_23285	Ca_23285.1|Ca_LG_8:13891111-13895789|plus|	2.8359	0.0183235	no	NA	NA	NA	13891111	13895789	+	P-loop containing nucleoside triphosphate hydrolases superfamily protein	PTHR23070 PTHR23070	IPR003593 IPR003959 IPR003960 IPR025753 IPR027417	PF00004 PF14363	GO:0000166 GO:0005524 GO:0017111	PS00674	SSF52540	Probable_mitochondrial_chaperone_bcs1	XM_004512017.1	#has_ATP_binding|#has_nucleoside-triphosphatase_activity|#has_nucleotide_binding|#located_in_plasma_membrane	cd00009-AAA|cl16828-AAA_assoc|cl21455-ABC_ATPase|smart00382-AAA	--	--
Ca_13560	Ca_13560.1|Ca_LG_5:28991325-28991759|minus|	2.62427	0.0183357	no	NA	NA	NA	28991325	28991759	-	subtilisin-like serine protease 2	PTHR10795 PTHR10795	IPR015500					Subtilisin-like_protease	XM_004502043.1	#has_identical_protein_binding|#has_serine-type_endopeptidase_activity|#involved_in_negative_regulation_of_catalytic_activity|#involved_in_proteolysis|#located_in_extracellular_region	--	--	--
Ca_04709	Ca_04709.1|Ca_LG_2:28617325-28619983|minus|	-2.67065	0.0184386	no	NA	NA	NA	28617325	28619983	-	c("putative calcium-transporting ATPase 13"	PTHR24093 PTHR24093	IPR001757 IPR006068 IPR006408 IPR008250 IPR023214 IPR023298 IPR023299	PF00122 PF00689 PF00702 PF13246			SSF56784 SSF81653 SSF81660 SSF81665	Calcium-transporting_ATPase_12,_plasma_membrane-type	XM_004507209.1	#has_ATP_binding|#has_ATPase_activity,_coupled_to_transmembrane_movement_of_ions,_phosphorylative_mechanism|#has_calcium-transporting_ATPase_activity|#has_catalytic_activity|#has_metal_ion_binding|#has_nucleotide_binding|#involved_in_ATP_biosynthetic_process|#involved_in_calcium_ion_transmembrane_transport|#involved_in_cation_transport|#involved_in_metabolic_process|#located_in_membrane	cl02811-E1-E2_ATPase|cl02929-Cation_ATPase_C|cl16182-Hydrolase_like2|cl21460-HAD_like	--	--
Ca_13495	Ca_13495.1|Ca_LG_5:28241370-28244672|plus|	-1.53743	0.0184386	no	NA	NA	NA	28241370	28244672	+	trehalose phosphate synthase	PTHR10788 PTHR10788	IPR001830 IPR003337 IPR006379 IPR023214	PF00982 PF02358	GO:0003824 GO:0005992 GO:0008152		SSF53756 SSF56784	Probable_alpha,alpha-trehalose-phosphate_synthase_[UDP-forming]_9	XM_004501891.1	#has_catalytic_activity|#involved_in_trehalose_biosynthetic_process|#located_in_mitochondrion	PLN02205-PLN02205|cd03788-GT1_TPS|cl10013-Glycosyltransferase_GTB_type|cl21460-HAD_like	--	--
Ca_17962	Ca_17962.1|Ca_LG_6:37294014-37297521|plus|	6.18777	0.0184568	no	NA	NA	NA	37294014	37297521	+	BEL1-like homeodomain protein 8-like isoform X2 [Glycine max]	PTHR11850	IPR001356 IPR006563 IPR008422 IPR009057	PF05920 PF07526	GO:0003677 GO:0003700 GO:0006355 GO:0043565	PS50071	SSF46689	BEL1-like_homeodomain_protein_9	XM_004507140.1	#has_sequence-specific_DNA_binding|#has_sequence-specific_DNA_binding_transcription_factor_activity|#involved_in_regulation_of_transcription,_DNA-dependent|#located_in_nucleus	cd00086-homeodomain|cl00084-homeodomain|cl02677-POX	TALE	--
Ca_03779	Ca_03779.1|Ca_LG_2:11451958-11452950|minus|	-3.3069	0.0187307	no	NA	NA	NA	11451958	11452950	-	U-box domain-containing protein 11-like [Glycine max]	PTHR23315	IPR000225 IPR011989 IPR016024	PF00514	GO:0005488 GO:0005515	PS50176	SSF48371	U-box_domain-containing_protein_4	XM_004490502.1	#located_in_mitochondrion	cd00020-ARM|cl22454-ARM	bZIP	--
Ca_04487	Ca_04487.1|Ca_LG_2:25714824-25717247|plus|	-4.32863	0.0187307	no	NA	NA	NA	25714824	25717247	+	Protein of unknown function (DUF1262)	PTHR31050	IPR010683	PF06880				--	XM_003613312.1	--	cl06095-DUF1262	--	--
Ca_05373	Ca_05373.1|Ca_LG_3:5291533-5295046|minus|	6.35888	0.0187307	no	NA	NA	NA	5291533	5295046	-	cysteine-rich receptor-like protein kinase 10-like [Glycine max]	PTHR32080 PTHR32080	IPR002902	PF01657		PS51473		Cysteine-rich_repeat_secretory_protein_15	XM_004491865.1	#located_in_plasma_membrane	cl03296-Stress-antifung	--	--
Ca_09367	Ca_09367.1|Ca_LG_4:16841754-16842196|plus|	4.23642	0.0187307	no	NA	NA	NA	16841754	16842196	+	uncharacterized protein LOC100793911 isoform X5 [Glycine max]							--	XM_004493996.1	#located_in_nucleus	--	--	--
Ca_16444	Ca_16444.1|Ca_LG_6:14451236-14455947|minus|	2.79251	0.0187307	no	NA	NA	NA	14451236	14455947	-	ubiquitin-conjugating enzyme 23	PTHR24067 PTHR24067	IPR000608 IPR016135	PF00179	GO:0016881	PS50127	SSF54495	Probable_ubiquitin-conjugating_enzyme_E2_24	XR_190016.1	#has_acid-amino_acid_ligase_activity|#located_in_nucleus	cl00154-UBCc	--	--
Ca_22511	Ca_22511.1|Ca_LG_8:4536766-4538017|plus|	-2.92309	0.0187307	no	NA	NA	NA	4536766	4538017	+	ethylene-responsive transcription factor 5-like [Glycine max]	PTHR31657 PTHR31657	IPR001471 IPR016177	PF00847	GO:0003677 GO:0003700 GO:0006355	PS51032	SSF54171	Ethylene-responsive_transcription_factor_ERF061	XM_004511464.1	#has_DNA_binding|#has_sequence-specific_DNA_binding_transcription_factor_activity|#involved_in_regulation_of_transcription,_DNA-dependent|#located_in_nucleus	cd00018-AP2|cl00033-AP2	ERF	--
Ca_08738	Ca_08738.1|Ca_LG_4:8920929-8922602|minus|	-3.59161	0.0187923	no	NA	NA	NA	8920929	8922602	-	myb transcription factor	PTHR10641 PTHR10641	IPR001005 IPR009057 IPR017930	PF00249	GO:0003677 GO:0003682	PS51294	SSF46689	Myb-related_protein_Myb4	XM_004496520.1	#has_DNA_binding|#located_in_nucleus	cd00167-SANT|cl21498-SANT	MYB	--
Ca_08640	Ca_08640.1|Ca_LG_4:7882516-7885325|minus|	-3.26654	0.0188047	no	NA	NA	NA	7882516	7885325	-	indole-3-acetic acid inducible 14	PTHR31734 PTHR31734	IPR003311 IPR011525	PF02309	GO:0005634 GO:0006355 GO:0046983	PS50962	SSF54277	Auxin-responsive_protein_IAA14	XM_004495335.1	#involved_in_regulation_of_transcription,_DNA-dependent|#located_in_nucleus	cl03528-AUX_IAA	--	--
Ca_02599	Ca_02599.1|Ca_LG_1:37254737-37257307|minus|	-1.54201	0.0189062	no	NA	NA	NA	37254737	37257307	-	general transcription factor group E6	PTHR22880	IPR001487 IPR027353	PF00439	GO:0005515	PS50014 PS51525	SSF47370	Transcription_factor_GTE3,_chloroplastic	XM_004485576.1	#located_in_nucleus	cl02556-Bromodomain	--	--
Ca_13774	Ca_13774.1|Ca_LG_5:31211896-31212803|minus|	-2.14246	0.0193394	no	NA	NA	NA	31211896	31212803	-	hypothetical protein		IPR000008	PF00168	GO:0005515		SSF49562	--	XM_004502372.1	#located_in_nucleus	cd00030-C2|cl14603-C2	--	--
Ca_26438	Ca_26438.1|scaffold05035:409-3054|plus|	1.35153	0.0195041	no	NA	NA	NA	409	3054	+	Peroxidase superfamily protein	PTHR31235 PTHR31235	IPR000823 IPR002016 IPR010255 IPR019793	PF00141	GO:0004601 GO:0006979 GO:0020037 GO:0055114	PS00435 PS50873	SSF48113	Peroxidase_12	XM_004515046.1	#has_heme_binding|#has_peroxidase_activity|#involved_in_oxidation-reduction_process|#involved_in_response_to_oxidative_stress|#located_in_cell_wall|#located_in_extracellular_region|#located_in_membrane|#located_in_plasmodesma|#located_in_vacuole	cd00693-secretory_peroxidase|cl00196-plant_peroxidase_like	--	--
Ca_22169	Ca_22169.1|Ca_LG_8:188815-190594|plus|	-1.94903	0.0197131	no	NA	NA	NA	188815	190594	+	CMP/dCMP deaminase zinc-binding protein n=7 Tax=Clostridium thermocellum RepID=A3DID8_CLOTH	PTHR11079	IPR002125 IPR016192 IPR016193	PF00383	GO:0003824 GO:0008270 GO:0016787	PS00903	SSF53927	Guanine_deaminase	XM_004488124.1	#has_catalytic_activity|#has_hydrolase_activity|#has_zinc_ion_binding|#located_in_chloroplast|#located_in_cytosol|#related_to_anaerobic_respiration|#related_to_deoxyribose_phosphate_metabolic_process|#related_to_pyrimidine_deoxyribonucleoside_interconversion|#related_to_pyrimidine_ribonucleotide_metabolic_process	cd01285-nucleoside_deaminase|cl00269-cytidine_deaminase-like	--	--
Ca_11866	Ca_11866.1|Ca_LG_4:54614637-54618416|minus|	-2.48327	0.0198679	no	NA	NA	NA	54614637	54618416	-	D-isomer specific 2-hydroxyacid dehydrogenase NAD-binding protein n=1 Tax=Desulfococcus multivorans DSM 2059 RepID=S7T7N2_DESML	PTHR10996 PTHR10996	IPR006139 IPR006140 IPR016040	PF00389 PF02826	GO:0008152 GO:0016616 GO:0048037 GO:0051287 GO:0055114	PS00065	SSF51735 SSF52283	Glycerate_dehydrogenase_HPR,_peroxisomal_	XM_004497118.1	--	COG1052-LdhA|cd05301-GDH|cl21454-SDR	--	--
Ca_23222	Ca_23222.1|Ca_LG_8:13208804-13214429|plus|	-4.22603	0.0199512	no	NA	NA	NA	13208804	13214429	+	hydroxymethylglutaryl-CoA synthase-like [Glycine max]	PTHR11877 PTHR11877	IPR000590 IPR010122 IPR013528 IPR013746 IPR016038 IPR016039	PF01154 PF08540	GO:0003824 GO:0004421 GO:0008152 GO:0008299	PS01226	SSF53901	Hydroxymethylglutaryl-CoA_synthase	XM_004513635.1	#has_catalytic_activity|#has_hydroxymethylglutaryl-CoA_synthase_activity|#involved_in_isoprenoid_biosynthetic_process|#involved_in_metabolic_process|#located_in_cytosol|#located_in_mitochondrion|#located_in_plasmodesma	PLN02577-PLN02577|cd00827-init_cond_enzymes|cl09938-cond_enzymes	--	--
Ca_06013	Ca_06013.1|Ca_LG_3:17773598-17775210|minus|	2.77441	0.0199824	no	NA	NA	NA	17773598	17775210	-	Heavy metal transport/detoxification superfamily protein	PTHR22814	IPR006121	PF00403	GO:0030001 GO:0046872	PS50846	SSF55008	Copper_transport_protein_CCH	XM_004489458.1	#has_metal_ion_binding|#involved_in_metal_ion_transport|#involved_in_response_to_cadmium_ion|#involved_in_response_to_salt_stress|#located_in_chloroplast	cd00371-HMA|cl00207-HMA	--	--
Ca_16134	Ca_16134.1|Ca_LG_6:10733715-10740216|minus|	1.48717	0.0199824	no	NA	NA	NA	10733715	10740216	-	acyl-activating enzyme 18	PTHR24095 PTHR24095	IPR000873 IPR020845 IPR025110	PF00501 PF13193	GO:0003824 GO:0008152	PS00455	SSF56801	Probable_acyl-activating_enzyme_17,_peroxisomal	XM_004504250.1	#has_catalytic_activity|#involved_in_metabolic_process|#located_in_mitochondrion	PLN03052-PLN03052|cl17068-AFD_class_I	--	--
Ca_13646	Ca_13646.1|Ca_LG_5:29945775-29951811|minus|	2.67065	0.0200009	no	NA	NA	NA	29945775	29951811	-	subtilisin-like serine protease 2	PTHR10795 PTHR10795	IPR000209 IPR003137 IPR010259 IPR015500 IPR023828	PF00082 PF02225 PF05922	GO:0004252 GO:0006508 GO:0042802 GO:0043086	PS00138	SSF52025 SSF52743	Subtilisin-like_protease	XM_004502043.1	#has_identical_protein_binding|#has_serine-type_endopeptidase_activity|#involved_in_negative_regulation_of_catalytic_activity|#involved_in_proteolysis	cd02120-PA_subtilisin_like|cd04852-Peptidases_S8_3|cl05470-Inhibitor_I9|cl10459-Peptidases_S8_S53	G2-like	--
Ca_02608	Ca_02608.1|Ca_LG_1:37323804-37327956|minus|	-2.31106	0.0200414	no	NA	NA	NA	37323804	37327956	-	Eukaryotic aspartyl protease family protein	PTHR13683 PTHR13683	IPR001461 IPR001969 IPR021109	PF14541 PF14543	GO:0004190 GO:0006508	PS00141	SSF50630	Aspartic_proteinase-like_protein_2	XM_004485585.1	#has_aspartic-type_endopeptidase_activity|#involved_in_proteolysis	cl11403-pepsin_retropepsin_like	--	--
Ca_04719	Ca_04719.1|Ca_LG_2:28746195-28750597|minus|	5.76294	0.0201815	no	NA	NA	NA	28746195	28750597	-	NAD-dependent glycerol-3-phosphate dehydrogenase family protein	PTHR11728 PTHR11728	IPR006109 IPR006168 IPR008927 IPR011128 IPR013328 IPR016040 IPR017751	PF01210 PF07479	GO:0004367 GO:0005737 GO:0005975 GO:0006072 GO:0009331 GO:0016491	PS00957	SSF48179 SSF51735	Glycerol-3-phosphate_dehydrogenase_[NAD(+)]_1,_chloroplastic	XM_004489496.1	#has_NAD_binding|#has_coenzyme_binding|#has_glycerol-3-phosphate_dehydrogenase_[NAD+]_activity|#has_nucleotide_binding|#has_oxidoreductase_activity|#has_oxidoreductase_activity,_acting_on_CH-OH_group_of_donors|#has_oxidoreductase_activity,_acting_on_the_CH-OH_group_of_donors,_NAD_or_NADP_as_acceptor|#has_protein_homodimerization_activity|#located_in_chloroplast|#located_in_cytoplasm|#located_in_g…	TIGR03376-Glycerol-3-phosphate_dehydrogenase|cl08454-NAD_Gly3P_dh_C|cl21454-SDR	--	--
Ca_01316	Ca_01316.1|Ca_LG_1:18197571-18198223|minus|	-1.28641	0.0204734	no	NA	NA	NA	18197571	18198223	-	Calcium-binding EF-hand family protein	PTHR10891 PTHR10891	IPR002048 IPR011992 IPR018247	PF13499	GO:0005509	PS00018 PS50222	SSF47473	Probable_calcium-binding_protein_CML45	XM_004491760.1	#has_calcium_ion_binding	cd00051-EFh|cl08302-EFh	--	--
Ca_01338	Ca_01338.1|Ca_LG_1:18791763-18792447|plus|	-1.74308	0.0204734	no	NA	NA	NA	18791763	18792447	+	plant intracellular ras group-related LRR 6	PTHR23155	IPR001611 IPR003591 IPR025875	PF00560 PF12799 PF13504	GO:0005515	PS51450	SSF52058	Plant_intracellular_Ras-group-related_LRR_protein_6_	XM_004487963.1	--	cl22710-LRR_RI	--	--
Ca_02965	Ca_02965.1|Ca_LG_2:1524222-1525230|plus|	-2.84259	0.0204734	no	NA	NA	NA	1524222	1525230	+	c("Exonuclease"		IPR006055 IPR012337 IPR013520	PF00929	GO:0003676 GO:0004527		SSF53098	DNA_polymerase_III_PolC-type	XM_004503991.1	#has_exonuclease_activity|#has_nucleic_acid_binding|#located_in_cytoplasm|#located_in_intracellular	COG0847-DnaQ|cd06127-DEDDh|cl10012-DnaQ_like_exo	NAC	--
Ca_08478	Ca_08478.1|Ca_LG_4:6079373-6082797|minus|	2.17856	0.0204734	no	NA	NA	NA	6079373	6082797	-	4-coumarate:CoA ligase 2	PTHR24096 PTHR24096	IPR000873 IPR020845 IPR025110	PF00501 PF13193	GO:0003824 GO:0008152	PS00455	SSF56801	4-coumarate--CoA_ligase-like_8	XM_004499268.1	#has_catalytic_activity|#involved_in_metabolic_process|#located_in_chloroplast	PLN02574-PLN02574|cd05904-4CL|cl17068-AFD_class_I	G2-like	--
Ca_08817	Ca_08817.1|Ca_LG_4:9947265-9950967|plus|	2.39178	0.0204734	no	NA	NA	NA	9947265	9950967	+	Disease resistance protein (TIR-NBS-LRR class) family	PTHR23155 PTHR23155	IPR000767 IPR002182 IPR008808 IPR027417	PF00931 PF05659	GO:0006952 GO:0043531	PS51153	SSF52058 SSF52540	Probable_disease_resistance_protein_At4g33300	XM_004499041.1	#has_ADP_binding|#involved_in_defense_response|#located_in_apoplast	--	--	NBS
Ca_10452	Ca_10452.1|Ca_LG_4:30164505-30173301|plus|	-1.69027	0.0204734	no	NA	NA	NA	30164505	30173301	+	lysosomal alpha-mannosidase-like [Glycine max]	PTHR11607 PTHR11607	IPR000602 IPR011013 IPR011330 IPR011682 IPR013780 IPR015341 IPR027291	PF01074 PF07748 PF09261	GO:0003824		SSF74650 SSF88688 SSF88713	Lysosomal_alpha-mannosidase	XM_004501693.1	#has_alpha-mannosidase_activity|#has_carbohydrate_binding|#has_catalytic_activity|#has_hydrolase_activity,_hydrolyzing_O-glycosyl_compounds|#has_mannosidase_activity|#has_zinc_ion_binding|#involved_in_carbohydrate_metabolic_process|#involved_in_mannose_metabolic_process|#located_in_apoplast|#located_in_cell_wall|#located_in_extracellular_region|#located_in_plant-type_cell_wall|#located_in_vacuola…	cd10810-GH38N_AMII_LAM_like|cl08536-Alpha-mann_mid|cl15692-CE4_SF|cl20343-Glyco_hydro_38C|smart00872-Alpha-mann_mid	--	--
Ca_10704	Ca_10704.1|Ca_LG_4:32843205-32845582|plus|	-4.11395	0.0204734	no	NA	NA	NA	32843205	32845582	+	prephenate dehydrogenase	PTHR11811 PTHR11811	IPR003099 IPR016040	PF02153	GO:0004665 GO:0006571 GO:0008977 GO:0055114	PS51176	SSF51735	Arogenate_dehydrogenase_1,_chloroplastic	XM_004508366.1	#has_nucleotide_binding|#has_prephenate_dehydrogenase_(NADP+)_activity|#has_prephenate_dehydrogenase_activity|#involved_in_oxidation-reduction_process|#involved_in_tyrosine_biosynthetic_process|#located_in_mitochondrion	PLN02256-PLN02256|PLN02712-PLN02712|cl21454-SDR	--	--
Ca_15204	Ca_15204.1|Ca_LG_6:171500-172424|minus|	-2.84421	0.0204734	no	NA	NA	NA	171500	172424	-	unknown protein							--	XM_004511984.1	#located_in_chloroplast	--	--	--
Ca_15337	Ca_15337.1|Ca_LG_6:1857371-1861980|minus|	-2.36091	0.0204734	no	NA	NA	NA	1857371	1861980	-	sucrose synthase 5	PTHR12526 PTHR12526	IPR000368 IPR001296 IPR012820	PF00534 PF00862	GO:0005985 GO:0009058 GO:0016157		SSF53756	Sucrose_synthase	XM_004503039.1	#involved_in_response_to_cadmium_ion|#located_in_cytosol	PLN00142-PLN00142|cd03800-GT1_Sucrose_synthase|cl10013-Glycosyltransferase_GTB_type	--	--
Ca_16969	Ca_16969.1|Ca_LG_6:20681287-20682358|minus|	2.4453	0.0204734	no	NA	NA	NA	20681287	20682358	-	Leucine-rich repeat receptor-like protein kinase family protein	PTHR24420					SSF52058	Uncharacterized_protein_At4g06744	XM_004505198.1	#located_in_extracellular_region	PLN00113-PLN00113	--	--
Ca_17411	Ca_17411.1|Ca_LG_6:26087266-26088626|plus|	-1.4879	0.0204734	no	NA	NA	NA	26087266	26088626	+	Chaperone DnaJ-domain superfamily protein	PTHR25040 PTHR25040	IPR001623	PF00226		PS50076	SSF46565	Chaperone_protein_dnaJ_8,_chloroplastic	XM_004506993.1	#has_heat_shock_protein_binding|#has_unfolded_protein_binding|#involved_in_protein_folding|#located_in_chloroplast	cd06257-DnaJ|cl02542-DnaJ	--	--
Ca_20349	Ca_20349.1|Ca_LG_7:24265582-24269982|minus|	-2.58044	0.0204734	no	NA	NA	NA	24265582	24269982	-	serine/threonine-protein phosphatase 7 long form homolog [Glycine max]		IPR019557	PF10536				Serine/threonine-protein_phosphatase_7_long_form_homolog	XM_004506627.1	#located_in_nucleus	cl11168-PMD	--	--
Ca_20506	Ca_20506.1|Ca_LG_7:26810907-26818607|minus|	2.00184	0.0204734	no	NA	NA	NA	26810907	26818607	-	calmodulin-binding heat-shock protein	PTHR21493 PTHR21493	IPR002921 IPR005592	PF01764 PF03893	GO:0004806 GO:0006629 GO:0016042		SSF53474	--	XM_004510734.1	#has_carboxylesterase_activity|#has_triglyceride_lipase_activity|#involved_in_lipid_catabolic_process|#involved_in_lipid_metabolic_process|#located_in_extracellular_region	cd00519-Lipase_3|cl04312-Lipase3_N|cl21494-Esterase_lipase	--	--
Ca_26171	Ca_26171.1|scaffold04423:14594-15820|minus|	-4.30518	0.0204734	no	NA	NA	NA	14594	15820	-	Ycf68 n=1 Tax=Medicago truncatula RepID=G7JEB0_MEDTR		IPR022546	PF10839				Uncharacterized_protein_ycf68_	XR_189382.1	--	cl12425-DUF2647	--	--
Ca_06305	Ca_06305.1|Ca_LG_3:23709636-23712246|plus|	6.57123	0.0208074	no	NA	NA	NA	23709636	23712246	+	protein SCARECROW-like [Glycine max]	PTHR31636 PTHR31636	IPR005202	PF03514		PS50985		Protein_SCARECROW_1	XM_004492554.1	#located_in_nucleus	cl15987-GRAS	GRAS	--
Ca_29995	Ca_29995.1|scaffold25162:100-800|plus|	-2.52195	0.0208074	no	NA	NA	NA	100	800	+	c("Klebsiella pneumoniae str. Kp52.145"							--	KC189947.1	--	--	--	--
Ca_08296	Ca_08296.1|Ca_LG_4:3644914-3647171|minus|	2.02314	0.021271	no	NA	NA	NA	3644914	3647171	-	ferredoxin 3	PTHR32148	IPR001041 IPR006058 IPR010241 IPR012675	PF00111	GO:0009055 GO:0022900 GO:0051536 GO:0051537	PS00197 PS51085	SSF54292	Ferredoxin-3,_chloroplastic	XM_004497095.1	#has_2_iron,_2_sulfur_cluster_binding|#has_electron_carrier_activity|#has_iron-sulfur_cluster_binding|#involved_in_electron_transport_chain|#located_in_chloroplast	cd00207-fer2|cl00159-fer2	--	--
Ca_07745	Ca_07745.1|Ca_LG_3:39622058-39625305|minus|	2.26154	0.0218504	no	NA	NA	NA	39622058	39625305	-	protein AUXIN RESPONSE 4-like [Glycine max]	PTHR10992		PF12697			SSF53474	Protein_AUXIN_RESPONSE_4	XM_004494556.1	#located_in_mitochondrion|#located_in_nucleus|#located_in_vacuolar_membrane	cl21494-Esterase_lipase	--	--
Ca_10858	Ca_10858.1|Ca_LG_4:34774392-34779121|plus|	1.73782	0.0218504	no	NA	NA	NA	34774392	34779121	+	isocitrate dehydrogenase V	PTHR11835 PTHR11835	IPR001804 IPR004434 IPR019818 IPR024084	PF00180	GO:0000287 GO:0004449 GO:0006099 GO:0016616 GO:0051287 GO:0055114	PS00470	SSF53659	Isocitrate_dehydrogenase_[NAD]_catalytic_subunit_6,_mitochondrial	XM_004497460.1	#has_NAD_binding|#has_isocitrate_dehydrogenase_(NAD+)_activity|#has_magnesium_ion_binding|#has_oxidoreductase_activity,_acting_on_the_CH-OH_group_of_donors,_NAD_or_NADP_as_acceptor|#involved_in_oxidation-reduction_process|#involved_in_tricarboxylic_acid_cycle|#located_in_mitochondrion	PLN00118-PLN00118|cl00445-Iso_dh	--	--
Ca_15949	Ca_15949.1|Ca_LG_6:8733837-8736889|plus|	-1.76522	0.0218504	no	NA	NA	NA	8733837	8736889	+	E3 ubiquitin-protein ligase RGLG2-like isoform X2 [Glycine max]	PTHR10857	IPR001841 IPR002035 IPR010734 IPR013083	PF07002 PF13920	GO:0005515 GO:0008270	PS50089	SSF53300 SSF57850	E3_ubiquitin-protein_ligase_RGLG1	XM_004504084.1	#has_protein_modification_of_type_N-terminal_protein_myristoylation|#has_zinc_ion_binding|#located_in_plasma_membrane	cd00162-RING|cl00057-vWFA|cl17238-RING	--	--
Ca_13979	Ca_13979.1|Ca_LG_5:33425440-33427041|minus|	-6.09144	0.0219882	no	NA	NA	NA	33425440	33427041	-	Pentatricopeptide repeat (PPR-like) superfamily protein	PTHR24015	IPR002885	PF01535 PF13041		PS51375	SSF48452	Pentatricopeptide_repeat-containing_protein_At3g21470	XM_004502538.1	#located_in_mitochondrion	TIGR00756-PPR|cl03252-PPR	--	--
Ca_05362	Ca_05362.1|Ca_LG_3:5029379-5039012|minus|	5.59854	0.0221036	no	NA	NA	NA	5029379	5039012	-	c("disease resistance protein (TIR-NBS-LRR class)"	PTHR11017 PTHR11017	IPR000157 IPR000767 IPR002182 IPR011713 IPR027417	PF00931 PF01582 PF07725	GO:0005515 GO:0006952 GO:0007165 GO:0043531	PS50104	SSF46785 SSF52058 SSF52200 SSF52540	TMV_resistance_protein_N	XM_004492407.1	#has_ADP_binding|#involved_in_defense_response|#involved_in_signal_transduction|#located_in_intracellular	COG4886-COG4886|cl06661-LRR_3|cl22462-TIR	--	TIR-NBS-LRR
Ca_12603	Ca_12603.1|Ca_LG_5:12702589-12703904|minus|	-4.97921	0.0221036	no	NA	NA	NA	12702589	12703904	-	subtilisin-like serine protease 3	PTHR10795 PTHR10795	IPR000209 IPR015500	PF00082	GO:0004252 GO:0006508		SSF52743	Subtilisin-like_protease_SDD1	XM_004513837.1	#has_identical_protein_binding|#has_serine-type_endopeptidase_activity|#involved_in_negative_regulation_of_catalytic_activity|#involved_in_proteolysis|#located_in_extracellular_region	cl10459-Peptidases_S8_S53	--	--
Ca_13248	Ca_13248.1|Ca_LG_5:25349233-25353066|minus|	1.66126	0.0221036	no	NA	NA	NA	25349233	25353066	-	TPR repeat-containing thioredoxin TTL1-like [Glycine max]	PTHR22904 PTHR22904	IPR001440 IPR011990 IPR012336 IPR013026 IPR013766 IPR019734	PF00085 PF00515 PF13174 PF13414	GO:0005515 GO:0045454	PS50005 PS50293	SSF48452 SSF52833	Inactive_TPR_repeat-containing_thioredoxin_TTL3_	XM_004500561.1	--	COG0457-NrfG|cd00189-TPR|cd02947-TRX_family|cl00388-Thioredoxin_like|cl22441-TPR|smart01043-BTAD	--	--
Ca_14248	Ca_14248.1|Ca_LG_5:36200585-36203519|minus|	-3.34677	0.0221036	no	NA	NA	NA	36200585	36203519	-	GRF1-interacting factor 3	PTHR23107	IPR007726	PF05030				GRF1-interacting_factor_3	XM_004502671.1	#located_in_nucleus	cl04896-SSXT	--	--
Ca_14838	Ca_14838.1|Ca_LG_5:41973852-41974508|minus|	-1.53812	0.0221036	no	NA	NA	NA	41973852	41974508	-	BSD domain-containing protein	PTHR31923 PTHR31923						--	XM_004501451.1	#located_in_nucleus	--	--	--
Ca_20983	Ca_20983.1|Ca_LG_7:32956663-32959763|minus|	5.2322	0.0221036	no	NA	NA	NA	32956663	32959763	-	nudix hydrolase homolog 8	PTHR13994 PTHR13994	IPR000086 IPR003293 IPR015797 IPR020084	PF00293	GO:0016787	PS00893 PS51462	SSF55811	Nudix_hydrolase_8	XM_004508888.1	#has_hydrolase_activity|#located_in_cytosol	cd04670-Nudix_Hydrolase_12|cl00447-Nudix_Hydrolase	--	--
Ca_25390	Ca_25390.1|scaffold03151:32515-33894|plus|	-1.55534	0.0221036	no	NA	NA	NA	32515	33894	+	uncharacterized protein LOC100795678 isoform X1 [Glycine max]	PTHR31161 PTHR31161	IPR006943	PF04859				--	XM_004514587.1	#located_in_mitochondrion	cl04804-DUF641	--	--
Ca_15011	Ca_15011.1|Ca_LG_5:43878359-43881143|plus|	-2.91864	0.022215	no	NA	NA	NA	43878359	43881143	+	serine/threonine-protein kinase TIO-like [Glycine max]	PTHR24350	IPR000719 IPR002290 IPR008271 IPR011009 IPR017441	PF00069	GO:0004672 GO:0004674 GO:0005524 GO:0006468 GO:0016772	PS00107 PS00108 PS50011	SSF56112	Serine/threonine-protein_kinase_Aurora-2	XM_004501032.1	#has_ATP_binding|#has_protein_kinase_activity|#has_protein_tyrosine_kinase_activity|#has_transferase_activity,_transferring_phosphorus-containing_groups|#involved_in_protein_phosphorylation	cd14007-STKc_Aurora|cl21453-PKc_like|smart00220-S_TKc	--	--
Ca_16356	Ca_16356.1|Ca_LG_6:13449014-13450873|plus|	3.14193	0.0224727	no	NA	NA	NA	13449014	13450873	+	Cytochrome P450 superfamily protein	PTHR24298	IPR001128 IPR002401 IPR017972	PF00067	GO:0005506 GO:0016705 GO:0020037 GO:0055114	PS00086	SSF48264	Licodione_synthase	XM_004505052.1	#has_electron_carrier_activity|#has_heme_binding|#has_iron_ion_binding|#has_oxidoreductase_activity,_acting_on_paired_donors,_with_incorporation_or_reduction_of_molecular_oxygen|#involved_in_oxidation-reduction_process	cl12078-p450	--	--
Ca_21342	Ca_21342.1|Ca_LG_7:36933937-36936975|minus|	2.22853	0.0224727	no	NA	NA	NA	36933937	36936975	-	Integral membrane HPP family protein		IPR007065	PF04982				--	XM_004508720.1	#located_in_chloroplast	cl04872-HPP	--	--
Ca_22290	Ca_22290.1|Ca_LG_8:1352954-1353895|plus|	-2.76518	0.0224727	no	NA	NA	NA	1352954	1353895	+	RING-H2 finger protein 2B	PTHR22763 PTHR22763	IPR001841 IPR013083	PF13639 PF14369	GO:0005515 GO:0008270	PS50089	SSF57850	E3_ubiquitin-protein_ligase_RING1-like	XM_004499347.1	#has_zinc_ion_binding	cd00162-RING|cl16832-zf-RING_3|cl17238-RING	--	--
Ca_08411	Ca_08411.1|Ca_LG_4:5123596-5127992|plus|	1.45871	0.0224991	no	NA	NA	NA	5123596	5127992	+	ATP-citrate lyase A-2	PTHR23118	IPR013650 IPR013816 IPR016102	PF08442	GO:0005524		SSF52210 SSF56059	ATP-citrate_synthase_subunit_alpha_chain_protein_1	XM_004489764.1	#has_ATP_binding|#has_ligase_activity|#located_in_cytoplasm|#located_in_cytosol	PLN02235-PLN02235|cl17255-ATP-grasp_4	--	--
Ca_17116	Ca_17116.1|Ca_LG_6:22241559-22245274|plus|	4.94246	0.0227288	no	NA	NA	NA	22241559	22245274	+	c("thiamine thiazole synthase 2"	PTHR10617 PTHR10617	IPR002922 IPR027495	PF01946	GO:0006950 GO:0009228		SSF51905	Thiamine_thiazole_synthase_1,_chloroplastic	XM_004505386.1	#involved_in_thiamine_biosynthetic_process|#located_in_chloroplast|#located_in_chloroplast_envelope|#located_in_chloroplast_stroma|#located_in_thylakoid	PLN02661-PLN02661|cl21454-SDR	--	--
Ca_21788	Ca_21788.1|Ca_LG_7:41420030-41423319|plus|	2.44729	0.0228619	no	NA	NA	NA	41420030	41423319	+	AP2-like ethylene-responsive transcription factor At1g16060-like [Glycine max]	PTHR32467	IPR001471 IPR016177	PF00847	GO:0003677 GO:0003700 GO:0006355	PS51032	SSF54171	AP2-like_ethylene-responsive_transcription_factor_At1g16060	XM_004507712.1	#located_in_nucleus	cd00018-AP2|cl00033-AP2	AP2	--
Ca_19496	Ca_19496.1|Ca_LG_7:7600761-7601429|minus|	-2.28359	0.0229082	no	NA	NA	NA	7600761	7601429	-	EF hand calcium-binding protein family	PTHR10891 PTHR10891	IPR002048 IPR011992 IPR018247	PF13202 PF13833	GO:0005509	PS00018 PS50222	SSF47473	Squidulin	XM_004508085.1	#has_calcium_ion_binding|#located_in_cytoplasm	PTZ00184-PTZ00184|cd00051-EFh|cl08302-EFh	--	--
Ca_01386	Ca_01386.1|Ca_LG_1:19631433-19633038|minus|	-2.33012	0.0229846	no	NA	NA	NA	19631433	19633038	-	Protein kinase superfamily protein	PTHR24351 PTHR24351	IPR000719 IPR002290 IPR008271 IPR011009	PF00069	GO:0004672 GO:0004674 GO:0005524 GO:0006468 GO:0016772	PS00108 PS50011	SSF56112	Protein_kinase_G11A	XM_004488656.1	#has_ATP_binding|#has_protein_kinase_activity|#has_protein_serine/threonine_kinase_activity|#has_transferase_activity,_transferring_phosphorus-containing_groups|#involved_in_protein_phosphorylation|#located_in_nucleus	cd05574-STKc_phototropin_like|cl21453-PKc_like|smart00220-S_TKc	--	--
Ca_21041	Ca_21041.1|Ca_LG_7:33624833-33627738|minus|	-1.84229	0.0231566	no	NA	NA	NA	33624833	33627738	-	trehalose-6-phosphate phosphatase	PTHR10788 PTHR10788	IPR003337 IPR006379 IPR023214	PF02358	GO:0003824 GO:0005992 GO:0008152		SSF56784	Probable_trehalose-phosphate_phosphatase_G	XM_004516789.1	#has_catalytic_activity|#involved_in_metabolic_process|#involved_in_trehalose_biosynthetic_process|#located_in_cytoplasm	PLN02580-PLN02580|cl21460-HAD_like	--	--
Ca_14428	Ca_14428.1|Ca_LG_5:37906407-37907387|minus|	2.96487	0.023405	no	NA	NA	NA	37906407	37907387	-	Cyclophilin-like peptidyl-prolyl cis-trans isomerase family protein	PTHR11071	IPR002130 IPR020892 IPR024936	PF00160	GO:0003755 GO:0006457	PS00170 PS50072	SSF50891	Peptidyl-prolyl_cis-trans_isomerase	XM_004500685.1	#has_peptidyl-prolyl_cis-trans_isomerase_activity|#involved_in_protein_folding|#located_in_Golgi_apparatus|#located_in_chloroplast|#located_in_cytoplasm|#located_in_cytosol|#located_in_plasma_membrane|#located_in_plasmodesma	cd01926-cyclophilin_ABH_like|cl00197-cyclophilin	--	--
Ca_29912	Ca_29912.1|scaffold24329:5968-8061|minus|	-3.72076	0.0239611	no	NA	NA	NA	5968	8061	-	Pentatricopeptide repeat (PPR) superfamily protein	PTHR24015 PTHR24015	IPR002885 IPR011990	PF01535 PF13041 PF13812	GO:0005515	PS51375		Pentatricopeptide_repeat-containing_protein_At2g03880,_mitochondrial	XM_004515927.1	#located_in_mitochondrion	TIGR00756-PPR|cl03252-PPR	--	--
Ca_03789	Ca_03789.1|Ca_LG_2:11686500-11692820|plus|	3.31592	0.024126	no	NA	NA	NA	11686500	11692820	+	Pentatricopeptide repeat (PPR-like) superfamily protein	PTHR24015 PTHR24015	IPR001229 IPR002885 IPR011990	PF01419 PF01535 PF13041	GO:0005515	PS51375	SSF51101	Pentatricopeptide_repeat-containing_protein_At1g19720	XM_004490548.1	#located_in_extracellular_region	TIGR00756-PPR|cd09612-Jacalin|cl03205-Jacalin_like|cl03252-PPR	--	--
Ca_09101	Ca_09101.1|Ca_LG_4:13243563-13248512|minus|	1.48261	0.0241325	no	NA	NA	NA	13243563	13248512	-	NAD(P)-binding Rossmann-fold superfamily protein	PTHR10366 PTHR10366	IPR001509 IPR016040	PF01370	GO:0003824 GO:0044237 GO:0050662		SSF51735	Tetraketide_alpha-pyrone_reductase_1	XM_004509856.1	#has_catalytic_activity|#has_coenzyme_binding|#has_nucleotide_binding|#involved_in_cellular_metabolic_process	PLN02662-PLN02662|cd08958-FR_SDR_e|cl21454-SDR	--	--
Ca_16815	Ca_16815.1|Ca_LG_6:18926094-18931550|minus|	3.59664	0.0241541	no	NA	NA	NA	18926094	18931550	-	auxin response factor 4	PTHR31384	IPR003340 IPR010525 IPR015300	PF02362 PF06507	GO:0003677 GO:0005634 GO:0006355 GO:0009725	PS50863	SSF10193	Auxin_response_factor_3	XM_004505047.1	#has_DNA_binding|#involved_in_regulation_of_transcription,_DNA-dependent|#involved_in_response_to_hormone_stimulus|#located_in_nucleus	cd10017-B3_DNA|cl05824-Auxin_resp|cl15242-BfiI_C_EcoRII_N_B3	ARF	--
Ca_09640	Ca_09640.1|Ca_LG_4:20617235-20630298|minus|	1.94068	0.0242457	no	NA	NA	NA	20617235	20630298	-	pleiotropic drug resistance 12	PTHR19241 PTHR19241	IPR003439 IPR003593 IPR013525 IPR013581 IPR027417	PF00005 PF01061 PF08370 PF14510	GO:0000166 GO:0005524 GO:0016020 GO:0016887 GO:0017111	PS50893	SSF52540	Pleiotropic_drug_resistance_protein_1	XM_004498586.1	#has_ATP_binding|#has_ATPase_activity|#has_nucleoside-triphosphatase_activity|#has_nucleotide_binding	PLN03140-PLN03140|cd03232-ABCG_PDR_domain2|cd03233-ABCG_PDR_domain1|cl07115-PDR_assoc|cl20552-ABC_trans_N|cl21455-ABC_ATPase|cl21474-ABC2_membrane	--	--
Ca_10587	Ca_10587.1|Ca_LG_4:31427484-31429213|plus|	-2.06831	0.0242457	no	NA	NA	NA	31427484	31429213	+	Regulator of Vps4 activity in the MVB pathway protein	PTHR12161	IPR005061	PF03398				IST1_homolog	XM_004497049.1	#located_in_cytoplasm	cl04048-Ist1	--	--
Ca_17977	Ca_17977.1|Ca_LG_6:37674957-37675391|plus|	-2.14649	0.0244963	no	NA	NA	NA	37674957	37675391	+	Calcium-binding EF-hand family protein	PTHR10891 PTHR10891	IPR002048 IPR011992 IPR018247	PF13833	GO:0005509	PS00018 PS50222	SSF47473	Calcium-binding_protein_PBP1	XM_004513495.1	#has_calcium_ion_binding|#located_in_nucleus	cl08302-EFh	--	--
Ca_21412	Ca_21412.1|Ca_LG_7:37631253-37633960|minus|	-1.7221	0.0244963	no	NA	NA	NA	37631253	37633960	-	c("Exonuclease"		IPR006055 IPR012337 IPR013520	PF00929	GO:0003676 GO:0004527		SSF53098	Uncharacterized_protein_Rv2191/MT2247	XM_004508661.1	#has_exonuclease_activity|#has_nucleic_acid_binding|#located_in_intracellular|#located_in_nucleus	COG0847-DnaQ|cd06127-DEDDh|cl10012-DnaQ_like_exo	--	--
Ca_14358	Ca_14358.1|Ca_LG_5:37212139-37213673|minus|	3.29631	0.024619	no	NA	NA	NA	37212139	37213673	-	Eukaryotic aspartyl protease family protein	PTHR13683 PTHR13683	IPR001461 IPR001969 IPR021109	PF14541 PF14543	GO:0004190 GO:0006508	PS00141	SSF50630	Aspartic_proteinase_nepenthesin-1	XM_004502945.1	#has_aspartic-type_endopeptidase_activity|#involved_in_proteolysis|#located_in_extracellular_region	PLN03146-PLN03146|cd05476-pepsin_A_like_plant|cl11403-pepsin_retropepsin_like	--	--
Ca_16801	Ca_16801.1|Ca_LG_6:18674205-18676235|minus|	-3.07853	0.0247331	no	NA	NA	NA	18674205	18676235	-	Cytochrome P450 superfamily protein	PTHR24286 PTHR24286	IPR001128	PF00067	GO:0005506 GO:0016705 GO:0020037 GO:0055114		SSF48264	Abscisic_acid_8'-hydroxylase_4	XM_004505162.1	#has_electron_carrier_activity|#has_heme_binding|#has_iron_ion_binding|#has_oxidoreductase_activity,_acting_on_paired_donors,_with_incorporation_or_reduction_of_molecular_oxygen|#involved_in_oxidation-reduction_process|#located_in_extracellular_region	cl12078-p450	--	--
Ca_06606	Ca_06606.1|Ca_LG_3:27937910-27940393|plus|	-4.23764	0.0248115	no	NA	NA	NA	27937910	27940393	+	protein kinase family protein	PTHR24420 PTHR24420	IPR001611 IPR024788	PF00560 PF12819	GO:0005515		SSF52058	Putative_leucine-rich_repeat_receptor-like_protein_kinase_At2g19210	XM_004513288.1	#has_ATP_binding|#has_protein_kinase_activity|#has_protein_modification_of_type_protein_phosphorylation|#has_protein_serine/threonine_kinase_activity|#has_transferase_activity,_transferring_phosphorus-containing_groups|#involved_in_protein_phosphorylation|#located_in_plasma_membrane	cl22710-LRR_RI	--	--
Ca_18147	Ca_18147.1|Ca_LG_6:40753749-40758472|plus|	4.42508	0.0248115	no	NA	NA	NA	40753749	40758472	+	probable xyloglucan glycosyltransferase 5-like [Glycine max]	PTHR32044 PTHR32044		PF13641			SSF53448	Probable_mannan_synthase_11	XM_004506073.1	#located_in_Golgi_apparatus	cd06437-CESA_CaSu_A2|cl11394-Glyco_tranf_GTA_type	--	--
Ca_05090	Ca_05090.1|Ca_LG_3:601641-605833|minus|	4.34581	0.0248256	no	NA	NA	NA	601641	605833	-	5-methyltetrahydropteroyltriglutamate--homocysteine methyltransferase n=2 Tax=Alcaligenes RepID=M5J2G5_9BURK	PTHR30519 PTHR30519	IPR002629 IPR013215	PF01717 PF08267	GO:0003871 GO:0008270 GO:0008652 GO:0009086		SSF51726	5-methyltetrahydropteroyltriglutamate--homocysteine_methyltransferase_1	NM_001279076.1	#has_5-methyltetrahydropteroyltriglutamate-homocysteine_S-methyltransferase_activity|#has_zinc_ion_binding|#involved_in_cellular_amino_acid_biosynthetic_process|#involved_in_methionine_biosynthetic_process|#involved_in_response_to_salt_stress|#located_in_apoplast|#located_in_chloroplast|#located_in_cytoplasm|#located_in_cytosol|#located_in_membrane|#located_in_peroxisome|#located_in_plasma_membra…	PLN02475-PLN02475|cd03311-CIMS_C_terminal_like|cd03312-CIMS_N_terminal_like|cl00464-URO-D_CIMS_like	--	--
Ca_12325	Ca_12325.1|Ca_LG_5:7822711-7823220|plus|	-2.12438	0.0248256	no	NA	NA	NA	7822711	7823220	+	uncharacterized protein LOC100810027 [Glycine max]		IPR025322	PF14009				--	XM_004500269.1	--	cl16533-DUF4228	--	--
Ca_21209	Ca_21209.1|Ca_LG_7:35365147-35365689|minus|	-4.57408	0.0248256	no	NA	NA	NA	35365147	35365689	-	zinc finger protein MAGPIE-like [Glycine max]							--	XM_004515753.1	#located_in_nucleus	--	--	--
Ca_14179	Ca_14179.1|Ca_LG_5:35565698-35567282|plus|	-2.96987	0.0250948	no	NA	NA	NA	35565551	35567353	+	2-oxoglutarate (2OG) and Fe(II)-dependent oxygenase superfamily protein	PTHR10209 PTHR10209	IPR005123 IPR026992 IPR027443	PF03171 PF14226	GO:0016491 GO:0016706 GO:0055114	PS51471	SSF51197	Flavonol_synthase/flavanone_3-hydroxylase	XM_004502584.1	#has_oxidoreductase_activity|#has_oxidoreductase_activity,_acting_on_paired_donors,_with_incorporation_or_reduction_of_molecular_oxygen,_2-oxoglutarate_as_one_donor,_and_incorporation_of_one_atom_each_of_oxygen_into_both_donors|#involved_in_oxidation-reduction_process|#located_in_cytoplasm	PLN03178-PLN03178|cl21496-2OG-FeII_Oxy|cl21672-DIOX_N	--	--
Ca_17721	Ca_17721.1|Ca_LG_6:32402087-32402913|minus|	-1.50291	0.0254088	no	NA	NA	NA	32402087	32402913	-	SOUL heme-binding family protein	PTHR11220 PTHR11220	IPR006917 IPR011256	PF04832			SSF55136	Heme-binding-like_protein_At3g10130,_chloroplastic	XM_004506587.1	#has_protein_modification_of_type_N-terminal_protein_myristoylation|#located_in_Golgi_apparatus|#located_in_cytoplasm|#located_in_plasma_membrane|#located_in_vacuole	cl04786-SOUL	--	--
Ca_03553	Ca_03553.1|Ca_LG_2:8165418-8169926|minus|	1.3131	0.0255445	no	NA	NA	NA	8165418	8169926	-	protein disulfide isomerase-like protein	PTHR18929	IPR005746 IPR005788 IPR012336 IPR013766 IPR017937	PF00085	GO:0006662 GO:0015035 GO:0016853 GO:0045454	PS00194 PS51352	SSF52833	Protein_disulfide-isomerase_2-3	XM_004491029.1	#has_electron_carrier_activity|#has_isomerase_activity|#has_protein_disulfide_oxidoreductase_activity|#involved_in_cell_redox_homeostasis|#involved_in_glycerol_ether_metabolic_process|#located_in_Golgi_apparatus|#located_in_chloroplast|#located_in_plasma_membrane|#located_in_vacuole	cd02983-P5_C|cd03001-PDI_a_P5|cl00388-Thioredoxin_like	--	--
Ca_15060	Ca_15060.1|Ca_LG_5:44316603-44319091|plus|	-2.45155	0.0260711	no	NA	NA	NA	44316603	44319091	+	phospholipase D alpha 1	PTHR18896 PTHR18896	IPR000008 IPR001736 IPR011402 IPR015679 IPR024632	PF00168 PF00614 PF12357	GO:0003824 GO:0004630 GO:0005509 GO:0005515 GO:0008152 GO:0016020 GO:0046470	PS50035	SSF49562 SSF56024	Phospholipase_D_alpha_2	XM_004501272.1	#has_calcium_ion_binding|#has_catalytic_activity|#has_phospholipase_D_activity|#involved_in_metabolic_process|#involved_in_phosphatidylcholine_metabolic_process|#located_in_membrane	PLN02270-PLN02270|cd04015-C2_plant_PLD|cl13753-PLD_C|cl14603-C2|cl15239-PLDc_SF	--	--
Ca_20426	Ca_20426.1|Ca_LG_7:25560114-25563268|minus|	-3.32503	0.0262236	no	NA	NA	NA	25560114	25563268	-	Protein kinase superfamily protein	PTHR24420	IPR000719 IPR002290 IPR008271 IPR011009 IPR017441	PF00069	GO:0004672 GO:0004674 GO:0005524 GO:0006468 GO:0016772	PS00107 PS00108 PS50011	SSF56112	Receptor-like_cytosolic_serine/threonine-protein_kinase_RBK1	XM_004509648.1	#has_ATP_binding|#has_protein_kinase_activity|#has_protein_serine/threonine_kinase_activity|#has_protein_tyrosine_kinase_activity|#has_transferase_activity,_transferring_phosphorus-containing_groups|#involved_in_protein_phosphorylation|#located_in_cytoplasm	cl21453-PKc_like|smart00221-STYKc	--	--
Ca_12828	Ca_12828.1|Ca_LG_5:17848143-17854630|minus|	-2.41852	0.0267116	no	NA	NA	NA	17848143	17854630	-	serine-glyoxylate aminotransferase-like protein	PTHR21152 PTHR21152	IPR000192 IPR015421 IPR015422 IPR015424 IPR020578 IPR024169	PF00266	GO:0003824 GO:0008152 GO:0030170	PS00595	SSF53383	Serine--glyoxylate_aminotransferase	XM_004499423.1	#has_catalytic_activity|#has_pyridoxal_phosphate_binding|#involved_in_metabolic_process|#located_in_apoplast|#located_in_chloroplast|#located_in_membrane|#located_in_peroxisome|#located_in_plasma_membrane	PLN02409-PLN02409|cd06451-AGAT_like|cl18945-AAT_I	--	--
Ca_10194	Ca_10194.1|Ca_LG_4:27047785-27052096|minus|	-1.77463	0.0268426	no	NA	NA	NA	27047785	27052096	-	choline kinase 1	PTHR22603	IPR011009	PF01633	GO:0016772		SSF56112	Probable_choline_kinase_1	XM_004496371.1	#has_phosphotransferase_activity,_alcohol_group_as_acceptor|#has_transferase_activity,_transferring_phosphorus-containing_groups|#located_in_cytoplasm	PLN02236-PLN02236|cd05157-ETNK_euk|cl21453-PKc_like	--	--
Ca_19660	Ca_19660.1|Ca_LG_7:10340954-10342240|plus|	-1.82156	0.026928	no	NA	NA	NA	10340954	10342240	+	Cell wall-associated hydrolase n=1 Tax=Medicago truncatula RepID=G8A317_MEDTR							Uncharacterized_protein_ORF91_	XR_190428.1	--	--	--	--
Ca_09415	Ca_09415.1|Ca_LG_4:17524758-17527405|plus|	2.7458	0.0270069	no	NA	NA	NA	17524758	17527405	+	Peroxidase superfamily protein	PTHR31235 PTHR31235	IPR000823 IPR002016 IPR010255 IPR019793 IPR019794	PF00141	GO:0004601 GO:0006979 GO:0020037 GO:0055114	PS00435 PS00436 PS50873	SSF48113	Peroxidase_47	XM_004495383.1	#has_heme_binding|#has_peroxidase_activity|#involved_in_oxidation-reduction_process|#involved_in_response_to_oxidative_stress|#located_in_extracellular_region	cd00693-secretory_peroxidase|cl00196-plant_peroxidase_like	--	--
Ca_11677	Ca_11677.1|Ca_LG_4:51635240-51635827|minus|	-2.47143	0.0270593	no	NA	NA	NA	51635240	51635827	-	SKP1-like 9	PTHR11165	IPR001232 IPR011333 IPR016072 IPR016073 IPR016897	PF01466 PF03931	GO:0006511		SSF54695 SSF81382	SKP1-like_protein_14	XM_004488712.1	#involved_in_ubiquitin-dependent_protein_catabolic_process|#located_in_nucleus	COG5201-SKP1|cl02518-BTB|cl03226-Skp1	--	--
Ca_09424	Ca_09424.1|Ca_LG_4:17602602-17603573|plus|	-2.27883	0.027598	no	NA	NA	NA	17602602	17603573	+	receptor-like protein kinase 4	PTHR24420 PTHR24420	IPR000719 IPR002290 IPR008271 IPR011009 IPR017441	PF00069	GO:0004672 GO:0004674 GO:0005524 GO:0006468 GO:0016772	PS00107 PS00108 PS50011	SSF56112	Probable_receptor-like_protein_kinase_At5g39020	XM_004498361.1	#has_ATP_binding|#has_protein_kinase_activity|#has_protein_serine/threonine_kinase_activity|#has_transferase_activity,_transferring_phosphorus-containing_groups|#involved_in_protein_phosphorylation|#located_in_plasma_membrane|#located_in_plasmodesma	cl21453-PKc_like|smart00219-TyrKc	--	--
Ca_19774	Ca_19774.1|Ca_LG_7:12936364-12955452|plus|	-1.5096	0.027598	no	NA	NA	NA	12936364	12955452	+	myosin 2	PTHR13140 PTHR13140	IPR000048 IPR001609 IPR004009 IPR027417	PF00063 PF00612 PF02736	GO:0003774 GO:0005515 GO:0005524 GO:0016459	PS50096	SSF52540	Myosin-2	XM_004509961.1	#has_ATP_binding|#has_motor_activity|#located_in_myosin_complex|#located_in_plasma_membrane	cl00286-Motor_domain|cl03686-Myosin_N	--	--
Ca_22673	Ca_22673.1|Ca_LG_8:5999060-6003969|plus|	-1.66901	0.0276278	no	NA	NA	NA	5999060	6003969	+	c("probable amino-acid acetyltransferase NAGS2"	PTHR30602	IPR000182 IPR001048 IPR010167 IPR016181	PF00696 PF13508	GO:0004042 GO:0005737 GO:0006526 GO:0008080	PS51186	SSF53633 SSF55729	Probable_amino-acid_acetyltransferase_NAGS1,_chloroplastic	XM_004511768.1	#has_N-acetyltransferase_activity|#has_acetyl-CoA:L-glutamate_N-acetyltransferase_activity|#involved_in_arginine_biosynthetic_process|#involved_in_cellular_amino_acid_biosynthetic_process|#located_in_cytoplasm	PLN02825-PLN02825|cd04237-AAK_NAGS-ABP|cd04301-NAT_SF|cl00452-AAK|cl17182-NAT_SF	--	--
Ca_03735	Ca_03735.1|Ca_LG_2:10733525-10736102|minus|	-6.64258	0.0278483	no	NA	NA	NA	10733525	10736102	-	extra-large GTP-binding protein 3							--	XM_004490706.1	#has_guanyl_nucleotide_binding|#has_signal_transducer_activity|#involved_in_G-protein_coupled_receptor_signaling_pathway|#involved_in_signal_transduction|#located_in_cytoplasm	--	--	--
Ca_14964	Ca_14964.1|Ca_LG_5:43310522-43315758|plus|	-1.48219	0.0278483	no	NA	NA	NA	43310522	43315758	+	subtilisin-like serine protease 2	PTHR10795 PTHR10795	IPR000209 IPR003137 IPR010259 IPR015500 IPR023828	PF00082 PF02225 PF05922	GO:0004252 GO:0006508 GO:0042802 GO:0043086	PS00138	SSF52743	Subtilisin-like_protease	XM_004500867.1	#has_identical_protein_binding|#has_serine-type_endopeptidase_activity|#involved_in_negative_regulation_of_catalytic_activity|#involved_in_proteolysis|#located_in_extracellular_region	cd02120-PA_subtilisin_like|cd04852-Peptidases_S8_3|cl05470-Inhibitor_I9|cl10459-Peptidases_S8_S53	--	--
Ca_22444	Ca_22444.1|Ca_LG_8:3665505-3669349|plus|	-1.51334	0.0278483	no	NA	NA	NA	3665505	3669349	+	disease resistance protein	PTHR23155 PTHR23155	IPR000767 IPR002182 IPR027417	PF00931	GO:0006952 GO:0043531		SSF52058 SSF52540	Disease_resistance_protein_RPM1	XM_004512397.1	#has_ADP_binding|#involved_in_defense_response|#located_in_plasma_membrane	COG4886-COG4886|cd14798-RX-CC_like|cl21455-ABC_ATPase|cl22426-RX-CC_like	--	CC-NBS-LRR
Ca_15392	Ca_15392.1|Ca_LG_6:2586792-2588369|plus|	-3.25813	0.0280099	no	NA	NA	NA	2586792	2588369	+	purple acid phosphatase 3	PTHR10161 PTHR10161	IPR004843 IPR024927	PF00149	GO:0003993 GO:0016787		SSF56300	Purple_acid_phosphatase_3	XM_004503193.1	#has_hydrolase_activity|#located_in_extracellular_region|#located_in_vacuole	cd07378-MPP_ACP5|cl13995-MPP_superfamily	E2F-DP	--
Ca_15191	Ca_15191.1|Ca_LG_5:45799821-45802671|plus|	2.76894	0.0284982	no	NA	NA	NA	45799821	45802671	+	hypothetical protein							--	XM_004499743.1	#located_in_chloroplast|#located_in_chloroplast_thylakoid_membrane|#located_in_thylakoid	--	--	--
Ca_06793	Ca_06793.1|Ca_LG_3:30256117-30256663|minus|	-1.71974	0.0287357	no	NA	NA	NA	30256117	30256663	-	Avr9/Cf-9 rapidly elicited protein		IPR008480	PF05553				--	XM_004493055.1	--	cl05229-DUF761	--	--
Ca_20543	Ca_20543.1|Ca_LG_7:27386285-27392754|plus|	-2.63859	0.0287357	no	NA	NA	NA	27386285	27392754	+	RING-H2 finger protein 2B	PTHR22764 PTHR22764	IPR001810 IPR001841 IPR013083 IPR019786	PF13639	GO:0005515 GO:0008270	PS01359 PS50089	SSF57850 SSF81383	Probable_F-box_protein_At3g61730	XM_004510619.1	#located_in_nucleus	cd00162-RING|cl02535-F-box|cl16494-GUB_WAK_bind|cl17238-RING	--	--
Ca_20945	Ca_20945.1|Ca_LG_7:32469546-32469883|plus|	-2.65693	0.0287357	no	NA	NA	NA	32469546	32469883	+	DUF761 domain protein		IPR008480	PF05553				--	XM_004486627.1	#located_in_nucleus	cl05229-DUF761	--	--
Ca_02603	Ca_02603.1|Ca_LG_1:37285039-37285617|plus|	-1.83049	0.0294097	no	NA	NA	NA	37285039	37285617	+	uncharacterized protein LOC102665280 [Glycine max]							--	XM_004485579.1	--	--	--	--
Ca_18016	Ca_18016.1|Ca_LG_6:38317296-38318908|plus|	2.44826	0.029763	no	NA	NA	NA	38317296	38318908	+	probable carboxylesterase 15-like [Glycine max]	PTHR23024 PTHR23024	IPR002168 IPR013094	PF07859	GO:0008152 GO:0016787	PS01174	SSF53474	Probable_carboxylesterase_15	XM_004506191.1	#has_hydrolase_activity|#involved_in_metabolic_process|#located_in_nucleus	cl21494-Esterase_lipase	--	--
Ca_11106	Ca_11106.1|Ca_LG_4:39451419-39453315|minus|	6.42376	0.0297728	no	NA	NA	NA	39451419	39453315	-	Disease resistance-responsive (dirigent-like protein) family protein	PTHR21495 PTHR21495	IPR004265	PF03018				Dirigent_protein_9	XM_004497257.1	#located_in_extracellular_region	cl03841-Dirigent	--	--
Ca_01214	Ca_01214.1|Ca_LG_1:16010782-16012194|minus|	-2.08625	0.0297742	no	NA	NA	NA	16010782	16012194	-	UDP-Glycosyltransferase superfamily protein	PTHR11926 PTHR11926	IPR002213	PF00201	GO:0008152 GO:0016758	PS00375	SSF53756	UDP-glucose_flavonoid_3-O-glucosyltransferase_6	XM_004488147.1	#has_transferase_activity,_transferring_hexosyl_groups|#involved_in_metabolic_process	PLN03015-PLN03015|cl21512-Glycos_transf_1	--	--
Ca_20932	Ca_20932.1|Ca_LG_7:32323847-32327838|plus|	3.51048	0.0297742	no	NA	NA	NA	32323847	32327838	+	probable methyltransferase PMT2-like [Glycine max]	PTHR31608 PTHR31608	IPR004159	PF03141	GO:0008168		SSF53335	Probable_methyltransferase_PMT16	XM_004508941.1	#has_methyltransferase_activity|#located_in_Golgi_apparatus	cl17173-AdoMet_MTases	--	--
Ca_01775	Ca_01775.1|Ca_LG_1:27699201-27699773|plus|	-4.5498	0.0303034	no	NA	NA	NA	27699201	27699773	+	RING/U-box superfamily protein	PTHR22764	IPR001841 IPR013083	PF13639	GO:0005515 GO:0008270	PS50089	SSF57850	Putative_RING-H2_finger_protein_ATL19	XM_004487696.1	#has_zinc_ion_binding	cd00162-RING|cl17238-RING	--	--
Ca_19050	Ca_19050.1|Ca_LG_7:888196-890261|plus|	1.55734	0.0304078	no	NA	NA	NA	888196	890261	+	Nucleoside diphosphate kinase family protein	PTHR11349 PTHR11349	IPR001564 IPR023005	PF00334	GO:0004550 GO:0005524 GO:0006165 GO:0006183 GO:0006228 GO:0006241	PS00469	SSF54919	Nucleoside_diphosphate_kinase_1	XM_004515277.1	#has_ATP_binding|#has_nucleoside_diphosphate_kinase_activity|#involved_in_CTP_biosynthetic_process|#involved_in_GTP_biosynthetic_process|#involved_in_UTP_biosynthetic_process|#involved_in_nucleoside_diphosphate_phosphorylation|#involved_in_response_to_cadmium_ion|#involved_in_response_to_salt_stress|#located_in_apoplast|#located_in_chloroplast|#located_in_cytoplasm|#located_in_cytosol|#located_in…	cd04413-NDPk_I|cl00335-NDPk	--	--
Ca_22950	Ca_22950.1|Ca_LG_8:9083112-9090814|minus|	-1.53557	0.0304078	no	NA	NA	NA	9083112	9090814	-	Protein kinase superfamily protein	PTHR23257 PTHR23257	IPR000719 IPR001245 IPR003903 IPR011009 IPR017441 IPR028324	PF07714 PF14381	GO:0004672 GO:0005524 GO:0006468 GO:0016772	PS00107 PS50011 PS50330	SSF56112	Serine/threonine-protein_kinase_EDR1	XM_003528923.2	#has_ATP_binding|#has_protein_kinase_activity|#has_protein_serine/threonine_kinase_activity|#has_transferase_activity,_transferring_phosphorus-containing_groups|#involved_in_protein_phosphorylation|#located_in_nucleus	cl18686-EDR1|cl21453-PKc_like|smart00219-TyrKc	--	--
Ca_11319	Ca_11319.1|Ca_LG_4:44037202-44042172|plus|	-1.12829	0.03055	no	NA	NA	NA	44037202	44042172	+	alpha carbonic anhydrase 7	PTHR18952	IPR001148 IPR018338 IPR023561	PF00194	GO:0004089 GO:0006730 GO:0008270	PS00162 PS51144	SSF51069	Bifunctional_monodehydroascorbate_reductase_and_carbonic_anhydrase_nectarin-3	XM_004515868.1	#has_carbonate_dehydratase_activity|#has_zinc_ion_binding|#involved_in_one-carbon_metabolic_process|#located_in_chloroplast	cd03124-alpha_CA_prokaryotic_like|cl00012-alpha_CA	--	--
Ca_25920	Ca_25920.1|scaffold03948:8104-8751|minus|	-1.59197	0.03055	no	NA	NA	NA	8104	8751	-	Chromosome condensation regulator-like protein n=1 Tax=Medicago truncatula RepID=G7KX16_MEDTR		IPR013591	PF08381		PS51514		--	XM_004514837.1	--	cl07125-BRX	--	--
Ca_03758	Ca_03758.1|Ca_LG_2:11137472-11139739|plus|	2.15052	0.0305917	no	NA	NA	NA	11137472	11139739	+	UDP-Glycosyltransferase superfamily protein	PTHR11926 PTHR11926	IPR002213	PF00201	GO:0008152 GO:0016758		SSF53756	UDP-glycosyltransferase_87A1	XM_004490597.1	#has_transferase_activity,_transferring_hexosyl_groups|#involved_in_metabolic_process	PLN02448-PLN02448|PLN02555-PLN02555|cl21512-Glycos_transf_1	--	--
Ca_21218	Ca_21218.1|Ca_LG_7:35480909-35482388|plus|	-2.09863	0.0305917	no	NA	NA	NA	35480909	35482388	+	unknown protein							--	XM_004515772.1	--	--	--	--
Ca_26476	Ca_26476.1|scaffold05113:6035-8435|plus|	-1.55426	0.0309553	no	NA	NA	NA	6035	8435	+	F-box and associated interaction domains-containing protein	PTHR32133	IPR001810 IPR006527 IPR011043 IPR015916 IPR017451	PF00646 PF07734	GO:0005515	PS50181	SSF50965 SSF81383	F-box_protein_CPR30	XM_004507570.1	#located_in_cytoplasm	cl02535-F-box|cl19514-FBA_1|smart00256-FBOX	--	--
Ca_04999	Ca_04999.1|Ca_LG_2:32186620-32193764|plus|	3.39203	0.0314903	no	NA	NA	NA	32186620	32193764	+	lisH domain and HEAT repeat KIAA1468-like protein	PTHR32059 PTHR32059	IPR006594 IPR011989 IPR016024 IPR021133		GO:0005488 GO:0005515	PS50077 PS50896	SSF48371	LisH_domain_and_HEAT_repeat-containing_protein_KIAA1468_homolog	XM_004489253.1	#located_in_cytoplasm	cl22501-LisH|smart00667-LisH	--	--
Ca_14245	Ca_14245.1|Ca_LG_5:36165112-36165342|plus|	-2.46384	0.031646	no	NA	NA	NA	36165112	36165342	+	SAUR-like auxin-responsive protein family	PTHR31374 PTHR31374	IPR003676	PF02519				Auxin-induced_protein_X10A_	XM_004502663.1	--	cl03633-Auxin_inducible	--	--
Ca_07989	Ca_07989.1|Ca_LG_3:41844157-41844719|minus|	-2.13835	0.0316988	no	NA	NA	NA	41844157	41844719	-	c("Protein of unknown function"	PTHR31676	IPR007493	PF04398			SSF14156	Uncharacterized_protein_At5g01610	XM_004494475.1	#located_in_apoplast|#located_in_nucleus	cl04499-DUF538	--	--
Ca_27783	Ca_27783.1|scaffold10566:849-3940|plus|	-2.69449	0.0317309	no	NA	NA	NA	849	3940	+	OR338 n=2 Tax=Vicia faba RepID=R4IUB8_VICFA							--	XM_004512757.1	--	--	--	--
Ca_16154	Ca_16154.1|Ca_LG_6:10943934-10945997|minus|	-2.15192	0.0317614	no	NA	NA	NA	10943934	10945997	-	major intrinsic protein (MIP) family transporter	PTHR19139 PTHR19139	IPR000425 IPR022357 IPR023271	PF00230	GO:0005215 GO:0006810 GO:0016020	PS00221	SSF81338	Nodulin-26	XM_004504207.1	#has_transporter_activity|#involved_in_transmembrane_transport|#involved_in_transport|#involved_in_water_transport|#located_in_cytoplasm|#located_in_integral_to_membrane|#located_in_membrane|#located_in_plasma_membrane	cd00333-MIP|cl00200-MIP	--	--
Ca_05560	Ca_05560.1|Ca_LG_3:8579614-8580886|plus|	2.16183	0.0317984	no	NA	NA	NA	8579614	8580886	+	DOF zinc finger protein 1	PTHR31992 PTHR31992	IPR003851	PF02701	GO:0003677 GO:0006355	PS01361 PS50884		Dof_zinc_finger_protein_DOF3.6	XM_004515561.1	#has_DNA_binding|#has_zinc_ion_binding|#involved_in_regulation_of_transcription,_DNA-dependent|#located_in_nucleus	cl03664-zf-Dof	Dof	--
Ca_04612	Ca_04612.1|Ca_LG_2:27399891-27401243|minus|	4.01527	0.0322484	no	NA	NA	NA	27399891	27401243	-	annexin 8	PTHR10502 PTHR10502	IPR018502	PF00191	GO:0005509 GO:0005544		SSF47874	Annexin_A13	XM_004489625.1	#has_calcium_ion_binding|#has_calcium-dependent_phospholipid_binding|#located_in_nucleus	cl02574-Annexin	--	--
Ca_04486	Ca_04486.1|Ca_LG_2:25708871-25709707|plus|	-2.87435	0.0327572	no	NA	NA	NA	25708871	25709707	+	Protein of unknown function (DUF1262)	PTHR31050						--	CT033767.2	--	--	--	--
Ca_04034	Ca_04034.1|Ca_LG_2:16215152-16220495|plus|	1.69254	0.0331891	no	NA	NA	NA	16215152	16220495	+	receptor-like protein kinase 2	PTHR24420 PTHR24420	IPR000719 IPR002290 IPR008271 IPR011009 IPR013210 IPR013320 IPR017441	PF00069 PF08263 PF13855	GO:0004672 GO:0004674	PS00107 PS00108 PS50011	SSF52058 SSF56112	Somatic_embryogenesis_receptor_kinase_1	XM_004490243.1	#located_in_plasma_membrane	cl08472-LRRNT_2|cl21453-PKc_like|smart00219-TyrKc	B3	--
Ca_11791	Ca_11791.1|Ca_LG_4:53457204-53459439|minus|	4.46379	0.0331891	no	NA	NA	NA	53457204	53459439	-	fiber protein Fb34	PTHR31769 PTHR31769	IPR009606	PF06749				--	XM_004496998.1	#located_in_extracellular_region|#located_in_plasma_membrane	cl06009-DUF1218	--	--
Ca_13425	Ca_13425.1|Ca_LG_5:27538322-27538923|minus|	2.31176	0.0331891	no	NA	NA	NA	27538322	27538923	-	phloem specific protein							--	XM_004501816.1	--	--	--	--
Ca_17225	Ca_17225.1|Ca_LG_6:23570269-23572938|minus|	-7.054	0.0332743	no	NA	NA	NA	23570269	23572938	-	c("DNA binding protein"	PTHR31391 PTHR31391	IPR003340 IPR007930 IPR015300	PF02362 PF05266	GO:0003677		SSF10193	B3_domain-containing_protein_Os01g0234100	XM_004509091.1	#has_DNA_binding|#involved_in_regulation_of_transcription,_DNA-dependent|#located_in_nucleus	cd10017-B3_DNA|cl15242-BfiI_C_EcoRII_N_B3|cl21643-DUF724	B3	--
Ca_30219	Ca_30219.1|scaffold26916:1794-5541|plus|	-1.26727	0.0333683	no	NA	NA	NA	1794	5541	+	alcohol dehydrogenase 1	PTHR11695 PTHR11695	IPR002085 IPR002328 IPR011032 IPR013149 IPR013154 IPR016040 IPR020843	PF00107 PF08240	GO:0008270 GO:0016491 GO:0016747 GO:0055114	PS00059	SSF50129 SSF51735	Alcohol_dehydrogenase-like_5	XM_004516528.1	#has_nucleotide_binding|#has_oxidoreductase_activity|#has_zinc_ion_binding|#involved_in_oxidation-reduction_process|#located_in_cytoplasm	COG1062-AdhC|cd08277-liver_alcohol_DH_like|cl16912-MDR	--	--
Ca_09781	Ca_09781.1|Ca_LG_4:22278861-22283059|plus|	-1.48202	0.0339258	no	NA	NA	NA	22278861	22283059	+	histone-lysine N-methyltransferase ATX5-like [Glycine max]	PTHR13793 PTHR13793	IPR001214 IPR003616	PF00856 PF13832	GO:0005515	PS50280 PS50868	SSF82199	Histone-lysine_N-methyltransferase_ATX5	XM_004498476.1	#has_zinc_ion_binding|#located_in_nucleus|#located_in_plasmodesma	cl02566-SET|cl17040-ADDz|smart00317-SET	--	--
Ca_10243	Ca_10243.1|Ca_LG_4:27519082-27522041|minus|	-1.40843	0.0339258	no	NA	NA	NA	27519082	27522041	-	Protein phosphatase 2C family protein	PTHR13832	IPR000222 IPR001932 IPR015655	PF00481	GO:0003824 GO:0004722 GO:0006470	PS01032	SSF81606	Probable_protein_phosphatase_2C_8	XM_004498351.1	#has_catalytic_activity|#has_protein_serine/threonine_phosphatase_activity|#involved_in_protein_dephosphorylation|#located_in_plasma_membrane|#located_in_protein_serine/threonine_phosphatase_complex	cd00143-PP2Cc|cl00120-PP2Cc	--	--
Ca_16163	Ca_16163.1|Ca_LG_6:11013225-11016042|minus|	-3.71438	0.0339258	no	NA	NA	NA	11013225	11016042	-	receptor-like kinase 902	PTHR24420 PTHR24420	IPR000719 IPR011009 IPR013210 IPR013320 IPR017441	PF00069 PF08263 PF13855	GO:0004672 GO:0005524 GO:0006468 GO:0016772	PS00107 PS50011	SSF52058 SSF56112	Probable_LRR_receptor-like_serine/threonine-protein_kinase_At4g31250	XR_189974.1	#has_ATP_binding|#has_protein_kinase_activity|#has_protein_tyrosine_kinase_activity|#has_transferase_activity,_transferring_phosphorus-containing_groups|#involved_in_protein_phosphorylation|#located_in_extracellular_region	cl08472-LRRNT_2|cl21453-PKc_like	--	--
Ca_23095	Ca_23095.1|Ca_LG_8:11341810-11345272|plus|	1.61992	0.0339258	no	NA	NA	NA	11341810	11345272	+	ATP binding/protein serine/threonine kinase [Glycine max]	PTHR24420 PTHR24420	IPR000719 IPR001611 IPR002290 IPR003591 IPR008271 IPR011009 IPR013320 IPR017441 IPR025875	PF00069 PF00560 PF12799 PF13855		PS00107 PS00108 PS50011 PS51450		Receptor-like_protein_kinase_HSL1	XM_004512994.1	#has_ATP_binding|#has_protein_kinase_activity|#has_protein_serine/threonine_kinase_activity|#has_transferase_activity,_transferring_phosphorus-containing_groups|#involved_in_protein_phosphorylation|#located_in_membrane|#located_in_plasma_membrane	PLN00113-PLN00113|cl21453-PKc_like|cl22710-LRR_RI	--	--
Ca_10294	Ca_10294.1|Ca_LG_4:28249879-28251984|minus|	-1.95253	0.0340082	no	NA	NA	NA	28249879	28251984	-	scarecrow-like protein 8-like [Glycine max]	PTHR31636 PTHR31636	IPR005202	PF03514		PS50985		Scarecrow-like_protein_8	XM_004496476.1	#located_in_nucleus	cl15987-GRAS	GRAS	--
Ca_14654	Ca_14654.1|Ca_LG_5:40005542-40011159|minus|	2.63537	0.0345105	no	NA	NA	NA	40005542	40011159	-	bZIP transcription factor bZIP62 [Glycine max]	PTHR22952 PTHR22952	IPR004827 IPR020983	PF00170 PF12498	GO:0003700 GO:0006355 GO:0043565	PS00036 PS50217	SSF57959	Basic_leucine_zipper_9	XM_004501150.1	#has_protein_dimerization_activity|#has_sequence-specific_DNA_binding|#has_sequence-specific_DNA_binding_transcription_factor_activity|#involved_in_regulation_of_transcription,_DNA-dependent|#located_in_nucleus	cd14702-bZIP_plant_GBF1|cl13879-bZIP_C|cl21462-bZIP	bZIP	--
Ca_13773	Ca_13773.1|Ca_LG_5:31208299-31208886|minus|	-1.83844	0.034571	no	NA	NA	NA	31208299	31208886	-	hypothetical protein		IPR000008	PF00168	GO:0005515		SSF49562	--	XM_004502373.1	#located_in_nucleus	cd00030-C2|cl14603-C2	--	--
Ca_02322	Ca_02322.1|Ca_LG_1:34654318-34657226|minus|	1.9934	0.0347697	no	NA	NA	NA	34654318	34657226	-	ankyrin repeat-containing protein At5g02620-like isoform X3 [Glycine max]		IPR020683 IPR026961	PF13962			SSF48403	Ankyrin_repeat-containing_protein_At3g12360_	XM_004486017.1	--	cd00204-ANK|cl02529-ANK|cl16503-PGG	--	--
Ca_10382	Ca_10382.1|Ca_LG_4:29241262-29250979|plus|	-1.62821	0.0347697	no	NA	NA	NA	29241262	29250979	+	Myblike DNA-binding domain containing protein n=1 Tax=Acanthamoeba castellanii str. Neff RepID=L8H867_ACACA	PTHR10641 PTHR10641	IPR001005 IPR009057 IPR017930	PF00249	GO:0003677 GO:0003682	PS51294	SSF46689	Myb-related_protein_3R-1	XM_004498423.1	#has_DNA_binding|#located_in_nucleus	cd00167-SANT|cl21498-SANT	MYB	--
Ca_07304	Ca_07304.1|Ca_LG_3:35492871-35493378|plus|	4.1261	0.034842	no	NA	NA	NA	35492871	35493378	+	ethylene-responsive transcription factor 1B	PTHR31190	IPR001471 IPR016177	PF00847	GO:0003677 GO:0003700 GO:0006355 GO:0006952 GO:0009873	PS51032	SSF54171	Ethylene-responsive_transcription_factor_ERF098	XM_004493713.1	#has_DNA_binding|#has_sequence-specific_DNA_binding_transcription_factor_activity|#involved_in_regulation_of_transcription,_DNA-dependent|#located_in_nucleus	cd00018-AP2|cl00033-AP2	ERF	--
Ca_08910	Ca_08910.1|Ca_LG_4:11040003-11043829|plus|	-1.84675	0.035099	no	NA	NA	NA	11040003	11043829	+	soluble inorganic pyrophosphatase	PTHR10286	IPR008162	PF00719	GO:0000287 GO:0004427 GO:0005737 GO:0006796	PS00387	SSF50324	Soluble_inorganic_pyrophosphatase	XM_004494947.1	#has_inorganic_diphosphatase_activity|#has_magnesium_ion_binding|#involved_in_phosphate-containing_compound_metabolic_process|#involved_in_response_to_cadmium_ion|#located_in_cytoplasm|#located_in_cytosol	cd00412-pyrophosphatase|cl00217-pyrophosphatase	--	--
Ca_20819	Ca_20819.1|Ca_LG_7:31012122-31013912|plus|	1.48987	0.0351396	no	NA	NA	NA	31012122	31013912	+	sigma factor sigb regulation rsbq-like protein	PTHR10992 PTHR10992		PF12697			SSF53474	Probable_esterase_D14L	XM_004509031.1	#located_in_cytoplasm	cl21494-Esterase_lipase	--	--
Ca_19930	Ca_19930.1|Ca_LG_7:16405198-16406383|plus|	-2.95959	0.0356043	no	NA	NA	NA	16405198	16406383	+	Late embryogenesis abundant (LEA) protein-related	PTHR31656 PTHR31656	IPR009646	PF06830				--	BT137431.1	#located_in_extracellular_region	cl06064-Root_cap	--	--
Ca_01828	Ca_01828.1|Ca_LG_1:28648454-28657606|minus|	2.25131	0.0361703	no	NA	NA	NA	28648454	28657606	-	ATP-binding ABC transporter	PTHR24223 PTHR24223	IPR001140 IPR003439 IPR003593 IPR011527 IPR017871 IPR027417	PF00005 PF00664	GO:0000166 GO:0005524 GO:0006810 GO:0016021 GO:0016887 GO:0017111 GO:0042626	PS00211 PS50893 PS50929	SSF52540 SSF90123	Putative_ABC_transporter_C_family_member_15	XM_004487793.1	#has_ATP_binding|#has_ATPase_activity|#has_ATPase_activity,_coupled_to_transmembrane_movement_of_substances|#has_nucleoside-triphosphatase_activity|#has_nucleotide_binding|#involved_in_transmembrane_transport|#involved_in_transport|#located_in_integral_to_membrane|#located_in_plasma_membrane	TIGR01271-CFTR_protein|cd03244-ABCC_MRP_domain2|cd03250-ABCC_MRP_domain1|cl00549-ABC_membrane|cl21455-ABC_ATPase	--	--
Ca_01942	Ca_01942.1|Ca_LG_1:30184272-30190603|minus|	1.70656	0.0361703	no	NA	NA	NA	30184272	30190603	-	Protein kinase superfamily protein	PTHR24056	IPR000719 IPR002290 IPR008271 IPR011009 IPR017441	PF00069	GO:0004672 GO:0004674 GO:0005524 GO:0006468 GO:0016772	PS00107 PS00108 PS50011	SSF56112	Cell_division_control_protein_2_homolog_B_(Fragment)	XM_004486452.1	#has_ATP_binding|#has_protein_kinase_activity|#has_protein_serine/threonine_kinase_activity|#has_transferase_activity,_transferring_phosphorus-containing_groups|#located_in_nucleus|#located_in_plasma_membrane	PLN00009-PLN00009|cd07835-STKc_CDK1_CdkB_like|cl21453-PKc_like	--	--
Ca_09833	Ca_09833.1|Ca_LG_4:22790516-22793499|minus|	-2.76237	0.0364334	no	NA	NA	NA	22790516	22793499	-	RING/FYVE/PHD zinc finger superfamily protein	PTHR23012 PTHR23012	IPR011016 IPR013083 IPR022143	PF12428 PF12906	GO:0008270	PS51292	SSF57850	Probable_E3_ubiquitin_ligase_SUD1	XM_004495849.1	#has_zinc_ion_binding|#located_in_cytoplasm	cl13815-DUF3675|cl17238-RING|smart00744-RINGv	--	--
Ca_01882	Ca_01882.1|Ca_LG_1:29353902-29355726|plus|	1.23906	0.0364613	no	NA	NA	NA	29353902	29355726	+	Peroxidase superfamily protein	PTHR31388 PTHR31388	IPR000823 IPR002016 IPR010255 IPR019793	PF00141	GO:0004601 GO:0006979 GO:0020037 GO:0055114	PS00435 PS50873	SSF48113	Peroxidase_15	XM_004486507.1	#has_heme_binding|#has_peroxidase_activity|#involved_in_oxidation-reduction_process|#involved_in_response_to_oxidative_stress|#involved_in_response_to_salt_stress|#located_in_extracellular_region|#located_in_plant-type_cell_wall	cd00693-secretory_peroxidase|cl00196-plant_peroxidase_like	--	--
Ca_14785	Ca_14785.1|Ca_LG_5:41428502-41431726|plus|	-3.98234	0.0364682	no	NA	NA	NA	41428502	41431726	+	unknown protein							--	XM_004501626.1	#located_in_membrane	TIGR02169-chromosome_segregation_protein_related_ptotein	--	--
Ca_25266	Ca_25266.1|scaffold02909:17572-18984|minus|	3.82561	0.0364981	no	NA	NA	NA	17572	18984	-	UDP-glucosyltransferase family protein	PTHR11926 PTHR11926	IPR002213	PF00201	GO:0008152 GO:0016758	PS00375	SSF53756	Isoflavone_7-O-glucosyltransferase_1	XM_004516636.1	#has_transferase_activity,_transferring_hexosyl_groups|#involved_in_metabolic_process|#located_in_cytosol	PLN02992-PLN02992|cl21512-Glycos_transf_1	--	--
Ca_01860	Ca_01860.1|Ca_LG_1:29010021-29017106|plus|	-1.9324	0.036546	no	NA	NA	NA	29010021	29017106	+	3-hydroxyacyl-CoA dehydrogenase family protein	PTHR23309	IPR001753 IPR006108 IPR006176 IPR006180 IPR008927 IPR013328 IPR016040 IPR018376	PF00378 PF00725 PF02737	GO:0003824 GO:0003857 GO:0006631 GO:0008152 GO:0016491	PS00067 PS00166	SSF48179 SSF51735 SSF52096	Peroxisomal_fatty_acid_beta-oxidation_multifunctional_protein_AIM1	XM_004487777.1	#has_3-hydroxyacyl-CoA_dehydrogenase_activity|#has_catalytic_activity|#has_coenzyme_binding|#has_nucleotide_binding|#has_oxidoreductase_activity|#has_oxidoreductase_activity,_acting_on_the_CH-OH_group_of_donors,_NAD_or_NADP_as_acceptor|#involved_in_fatty_acid_metabolic_process|#involved_in_metabolic_process|#involved_in_oxidation-reduction_process|#located_in_cell_wall|#located_in_chloroplast|#lo…	PRK11154-fadJ|cd06558-crotonase-like|cl08285-3HCDH|cl17173-AdoMet_MTases|cl21466-crotonase-like	--	--
Ca_16922	Ca_16922.1|Ca_LG_6:20178845-20180381|minus|	2.54358	0.036546	no	NA	NA	NA	20178845	20180381	-	phloem protein 2-A1	PTHR32485 PTHR32485	IPR025886	PF14299				Protein_PHLOEM_PROTEIN_2-LIKE_A1	XM_004505263.1	#located_in_nucleus	cl16784-PP2	--	--
Ca_17881	Ca_17881.1|Ca_LG_6:35649874-35650606|plus|	5.91892	0.036546	no	NA	NA	NA	35649874	35650606	+	Disease resistance-responsive (dirigent-like protein) family protein	PTHR21495	IPR004265	PF03018				Dirigent_protein_19	XM_004514198.1	#has_protein_modification_of_type_N-terminal_protein_myristoylation|#located_in_chloroplast	cl03841-Dirigent	--	--
Ca_20820	Ca_20820.1|Ca_LG_7:31025950-31027497|plus|	2.69363	0.0371652	no	NA	NA	NA	31025950	31027497	+	lysine-rich arabinogalactan protein 18-like [Glycine max]							Lysine-rich_arabinogalactan_protein_18	XM_004509032.1	#located_in_plasma_membrane	--	--	--
Ca_05288	Ca_05288.1|Ca_LG_3:3498124-3498456|plus|	-1.86756	0.0372305	no	NA	NA	NA	3498124	3498456	+	LURP-one-like protein	PTHR31087 PTHR31087	IPR007612 IPR025659	PF04525			SSF54518	Protein_LURP-one-related_15	XM_004492567.1	#located_in_chloroplast	cl02043-Tub_2	--	--
Ca_11508	Ca_11508.1|Ca_LG_4:47903527-47907136|minus|	-2.6607	0.0373337	no	NA	NA	NA	47903527	47907136	-	calcium dependent protein kinase 1	PTHR24349 PTHR24349	IPR000719 IPR002048 IPR002290 IPR008271 IPR011009 IPR011992 IPR017441 IPR018247	PF00069 PF13499		PS00018 PS00107 PS00108 PS50011 PS50222	SSF47473 SSF56112	Calcium-dependent_protein_kinase	XM_004497572.1	#has_ATP_binding|#has_calcium_ion_binding|#has_protein_kinase_activity|#has_transferase_activity,_transferring_phosphorus-containing_groups|#involved_in_protein_phosphorylation|#located_in_nucleus	PTZ00184-PTZ00184|cd00051-EFh|cd05117-STKc_CAMK|cl08302-EFh|cl21453-PKc_like|smart00220-S_TKc	--	--
Ca_06230	Ca_06230.1|Ca_LG_3:22382799-22388859|plus|	2.5896	0.0373992	no	NA	NA	NA	22382799	22388859	+	c("probable cyclic nucleotide-gated ion channel 20"	PTHR10217 PTHR10217	IPR000595 IPR003938 IPR005821 IPR014710 IPR018490 IPR021789	PF00027 PF00520 PF11834	GO:0005216 GO:0005249 GO:0006811 GO:0006813 GO:0016020 GO:0055085	PS50042 PS51490	SSF51206 SSF81324	Potassium_channel_KAT1	XM_004511076.1	#has_ion_channel_activity|#has_voltage-gated_potassium_channel_activity|#involved_in_ion_transport|#involved_in_potassium_ion_transport|#involved_in_transmembrane_transport|#located_in_membrane|#located_in_nucleus	PLN03192-PLN03192|cd00038-CAP_ED|cl00047-CAP_ED|cl13301-DUF3354|cl21560-Ion_trans_2	--	--
Ca_24991	Ca_24991.1|scaffold02494:5465-12359|plus|	-2.18562	0.0375851	no	NA	NA	NA	5465	12359	+	sucrose synthase 6	PTHR12526 PTHR12526	IPR000368 IPR001296 IPR012820	PF00534 PF00862	GO:0005985 GO:0009058 GO:0016157		SSF53756	Sucrose_synthase	XM_004515201.1	#has_sucrose_synthase_activity|#located_in_cytosol|#located_in_membrane|#located_in_plasma_membrane|#located_in_vacuole	TIGR02472-putative_sucrose-phosphate_synthase|cd03800-GT1_Sucrose_synthase|cl10013-Glycosyltransferase_GTB_type	--	--
Ca_03092	Ca_03092.1|Ca_LG_2:2693632-2698934|minus|	-1.41735	0.0375937	no	NA	NA	NA	2693632	2698934	-	uncharacterized protein LOC100810533 isoform X6 [Glycine max]	PTHR22884 PTHR22884	IPR001965 IPR013083 IPR022702	PF12047	GO:0005515 GO:0008270			PHD_finger-containing_protein_DDB_G0268158	XM_004491388.1	#has_zinc_ion_binding|#located_in_nucleus	cl13480-DNMT1-RFD|cl17040-ADDz	--	--
Ca_10405	Ca_10405.1|Ca_LG_4:29530795-29532147|plus|	-2.46389	0.0382725	no	NA	NA	NA	29530795	29532147	+	TCP family transcription factor	PTHR31072	IPR005333 IPR017887	PF03634		PS51369		Transcription_factor_TCP19	XM_004496564.1	#located_in_nucleus	cl15990-TCP	TCP	--
Ca_16620	Ca_16620.1|Ca_LG_6:16379166-16383327|plus|	2.47778	0.0386178	no	NA	NA	NA	16379166	16383327	+	serine carboxypeptidase-like 31	PTHR11802 PTHR11802	IPR001563 IPR018202	PF00450	GO:0004185 GO:0006508	PS00131	SSF53474	Putative_serine_carboxypeptidase-like_30	BT143132.1	#has_serine-type_carboxypeptidase_activity|#involved_in_proteolysis|#located_in_extracellular_region	cl08270-Peptidase_S10	--	--
Ca_09653	Ca_09653.1|Ca_LG_4:20738776-20746439|minus|	3.77264	0.0389158	no	NA	NA	NA	20738776	20746439	-	plasma membrane H+-ATPase	PTHR24093 PTHR24093	IPR001757 IPR004014 IPR006534 IPR008250 IPR018303 IPR023214 IPR023298 IPR023299	PF00122 PF00690 PF00702		PS00154	SSF56784	Probable_plasma_membrane_ATPase	XM_004498525.1	#has_ATP_binding|#has_ATPase_activity|#has_ATPase_activity,_coupled_to_transmembrane_movement_of_ions,_phosphorylative_mechanism|#has_catalytic_activity|#has_metal_ion_binding|#has_nucleotide_binding|#involved_in_ATP_biosynthetic_process|#involved_in_ATP_catabolic_process|#involved_in_cation_transport|#involved_in_metabolic_process|#located_in_integral_to_membrane|#located_in_membrane|#located_in…	COG4087-COG4087|TIGR01647-Plasma_membrane_ATPase|cl02811-E1-E2_ATPase|cl02930-Cation_ATPase_N|cl16182-Hydrolase_like2|cl21460-HAD_like|smart00831-Cation_ATPase_N	--	--
Ca_11068	Ca_11068.1|Ca_LG_4:38926605-38932041|plus|	3.17683	0.039079	no	NA	NA	NA	38926605	38932041	+	protein kinase family protein	PTHR24420 PTHR24420	IPR000719 IPR001245 IPR001611 IPR002290 IPR008271 IPR011009 IPR013320 IPR017441 IPR024788	PF00560 PF07714 PF12819		PS00107 PS00108 PS50011	SSF52058	Probable_LRR_receptor-like_serine/threonine-protein_kinase_At1g67720	XM_004497401.1	#has_ATP_binding|#has_protein_kinase_activity|#has_protein_serine/threonine_kinase_activity|#has_transferase_activity,_transferring_phosphorus-containing_groups|#involved_in_protein_phosphorylation|#located_in_plasma_membrane	cd14066-STKc_IRAK|cl21453-PKc_like|smart00221-STYKc	--	--
Ca_04923	Ca_04923.1|Ca_LG_2:31305852-31310416|minus|	-2.03493	0.0394409	no	NA	NA	NA	31305852	31310416	-	Raffinose synthase family protein	PTHR31268 PTHR31268	IPR008811 IPR013785 IPR017853	PF05691	GO:0003824		SSF51445	Galactinol--sucrose_galactosyltransferase	XM_004489170.1	#located_in_chloroplast|#located_in_cytoplasm	cl07893-AmyAc_family	--	--
Ca_10260	Ca_10260.1|Ca_LG_4:27739527-27742555|plus|	3.09135	0.0395331	no	NA	NA	NA	27739527	27742555	+	plasma membrane intrinsic protein 2A	PTHR19139 PTHR19139	IPR000425 IPR022357 IPR023271	PF00230	GO:0005215 GO:0006810 GO:0016020	PS00221	SSF81338	Aquaporin_PIP2-3	XM_004496224.1	#has_transporter_activity|#involved_in_transmembrane_transport|#involved_in_transport|#involved_in_water_transport|#located_in_integral_to_membrane|#located_in_membrane|#located_in_plasma_membrane	cd00333-MIP|cl00200-MIP	--	--
Ca_15164	Ca_15164.1|Ca_LG_5:45373070-45376439|plus|	2.2516	0.0398191	no	NA	NA	NA	45373070	45376439	+	putative pectinesterase/pectinesterase inhibitor 24-like [Glycine max]	PTHR31707 PTHR31707	IPR000070 IPR006501 IPR011050 IPR012334 IPR018040	PF01095 PF04043	GO:0004857 GO:0005618 GO:0030599 GO:0042545	PS00503	SSF10114 SSF51126	Pectinesterase_1	XM_004510514.1	#has_enzyme_inhibitor_activity|#has_pectinesterase_activity|#involved_in_cell_wall_modification|#located_in_cell_wall|#located_in_membrane|#located_in_nucleus|#located_in_plasma_membrane|#located_in_plasmodesma|#located_in_vacuolar_membrane	PLN02314-PLN02314|cd15798-PMEI-like_3|cl01911-Pectinesterase|cl04375-PMEI_like	--	--
Ca_07735	Ca_07735.1|Ca_LG_3:39516080-39517672|minus|	2.54758	0.0405218	no	NA	NA	NA	39516080	39517672	-	Heavy metal transport/detoxification superfamily protein	PTHR22814 PTHR22814	IPR006121	PF00403	GO:0030001 GO:0046872	PS50846	SSF55008	Copper_transport_protein_ATX1	XM_004494544.1	#has_metal_ion_binding|#involved_in_metal_ion_transport|#located_in_nucleus	cd00371-HMA|cl00207-HMA	--	--
Ca_10603	Ca_10603.1|Ca_LG_4:31575106-31578074|plus|	1.5603	0.0405218	no	NA	NA	NA	31575106	31578074	+	D-3-phosphoglycerate dehydrogenase	PTHR10996 PTHR10996	IPR002912 IPR006139 IPR006140 IPR006236 IPR015878 IPR016040	PF00389 PF01842 PF02826		PS00065 PS00670 PS00671 PS51671	SSF14354 SSF51735 SSF52283	D-3-phosphoglycerate_dehydrogenase,_chloroplastic	XM_004496899.1	#has_NAD_binding|#has_amino_acid_binding|#has_cofactor_binding|#has_nucleotide_binding|#has_oxidoreductase_activity,_acting_on_the_CH-OH_group_of_donors,_NAD_or_NADP_as_acceptor|#has_phosphoglycerate_dehydrogenase_activity|#involved_in_L-serine_biosynthetic_process|#involved_in_metabolic_process|#involved_in_oxidation-reduction_process|#located_in_chloroplast	PRK13581-PRK13581|cd04902-ACT_3PGDH-xct|cd12173-PGDH_4|cl09141-ACT|cl21454-SDR	--	--
Ca_21680	Ca_21680.1|Ca_LG_7:40331957-40332325|minus|	-1.53005	0.0405218	no	NA	NA	NA	40331957	40332325	-	uncharacterized protein LOC100778751 [Glycine max]							--	XM_004508481.1	#located_in_chloroplast	--	--	--
Ca_08466	Ca_08466.2|Ca_LG_4:5952828-5957311|plus|	-2.33155	0.0407733	no	NA	NA	NA	5952828	5957320	+	calcium-dependent protein kinase 29	PTHR24349 PTHR24349	IPR000719 IPR002048 IPR002290 IPR008271 IPR011009 IPR011992 IPR017441 IPR018247	PF00069 PF13499		PS00018 PS00107 PS00108 PS50011 PS50222	SSF47473 SSF56112	Calcium-dependent_protein_kinase_27	XM_004499250.1	#has_ATP_binding|#has_calcium_ion_binding|#has_protein_kinase_activity|#has_protein_modification_of_type_N-terminal_protein_myristoylation|#has_protein_serine/threonine_kinase_activity|#has_transferase_activity,_transferring_phosphorus-containing_groups|#involved_in_protein_phosphorylation|#located_in_plasma_membrane	COG5126-FRQ1|cd00051-EFh|cd05117-STKc_CAMK|cl08302-EFh|cl21453-PKc_like|smart00220-S_TKc	--	--
Ca_01580	Ca_01580.1|Ca_LG_1:24174468-24178268|plus|	4.13218	0.0408341	no	NA	NA	NA	24174468	24178268	+	Protein kinase superfamily protein	PTHR13902 PTHR13902	IPR000719 IPR002290 IPR008271 IPR011009	PF00069	GO:0004672 GO:0004674 GO:0005524 GO:0006468 GO:0016772	PS00108 PS50011	SSF56112	Serine/threonine-protein_kinase_WNK2	XM_004496678.1	#has_ATP_binding|#has_protein_kinase_activity|#has_protein_serine/threonine_kinase_activity|#has_protein_tyrosine_kinase_activity|#has_transferase_activity,_transferring_phosphorus-containing_groups|#involved_in_protein_phosphorylation|#located_in_cytoplasm	cd13983-STKc_WNK|cl21453-PKc_like|smart00220-S_TKc	--	--
Ca_07705	Ca_07705.1|Ca_LG_3:39184764-39185252|plus|	-2.86961	0.0417611	no	NA	NA	NA	39184764	39185252	+	uncharacterized protein LOC100790091 [Glycine max]		IPR007608	PF04520				--	XM_004493916.1	#located_in_mitochondrion	cl04561-Senescence_reg	--	--
Ca_01337	Ca_01337.1|Ca_LG_1:18768074-18771218|minus|	-3.2973	0.0419375	no	NA	NA	NA	18768074	18771218	-	uncharacterized protein At1g04910-like [Glycine max]	PTHR31288 PTHR31288	IPR019378	PF10250				Uncharacterized_protein_At1g04910	XM_004487962.1	#located_in_Golgi_apparatus	cl16914-O-FucT_like	--	--
Ca_14868	Ca_14868.1|Ca_LG_5:42254070-42256208|plus|	-3.43692	0.0421742	no	NA	NA	NA	42254070	42256208	+	MADS-box transcription factor family protein							--	XM_004501482.1	#has_DNA_binding|#has_protein_dimerization_activity|#located_in_nucleus	--	M-type	--
Ca_06832	Ca_06832.1|Ca_LG_3:30846365-30850826|plus|	1.75416	0.0424022	no	NA	NA	NA	30846365	30850826	+	NADH:cytochrome B5 reductase 1	PTHR19370 PTHR19370	IPR001433 IPR001709 IPR001834 IPR008333 IPR017927 IPR017938	PF00175 PF00970	GO:0016491 GO:0055114	PS51384	SSF52343 SSF63380	NADH--cytochrome_b5_reductase_1	XM_004493188.1	#has_oxidoreductase_activity|#involved_in_oxidation-reduction_process|#located_in_cytoplasm|#located_in_plasma_membrane	PTZ00319-PTZ00319|cd06183-cyt_b5_reduct_like|cl06868-FNR_like	--	--
Ca_11790	Ca_11790.1|Ca_LG_4:53445801-53447575|minus|	-2.12877	0.0424052	no	NA	NA	NA	53445801	53447575	-	Reticulon family protein	PTHR10994 PTHR10994	IPR003388	PF02453		PS50845		Reticulon-like_protein_B9	XM_004496997.1	#located_in_endoplasmic_reticulum|#located_in_mitochondrion	cl03599-Reticulon	--	--
Ca_18448	Ca_18448.1|Ca_LG_6:46879461-46882461|plus|	-1.23238	0.0424052	no	NA	NA	NA	46879461	46882461	+	UDP-glucuronic acid decarboxylase 6-like [Glycine max]	PTHR10366 PTHR10366	IPR001509 IPR016040	PF01370	GO:0003824 GO:0044237 GO:0050662		SSF51735	UDP-glucuronic_acid_decarboxylase_3	NM_001279086.1	#has_catalytic_activity|#has_coenzyme_binding|#has_nucleotide_binding|#involved_in_cellular_metabolic_process|#located_in_cytosol|#located_in_plasma_membrane	COG0451-WcaG|cd05230-UGD_SDR_e|cl21454-SDR	FAR1	--
Ca_03149	Ca_03149.1|Ca_LG_2:3121044-3124390|minus|	1.59117	0.0427833	no	NA	NA	NA	3121044	3124390	-	heat shock protein 81-2	PTHR11528	IPR001404 IPR003594 IPR019805 IPR020568 IPR020575	PF00183 PF13589	GO:0005524 GO:0006457 GO:0006950 GO:0051082	PS00298	SSF11094 SSF54211 SSF55874	Heat_shock_protein_83_(Fragment)	XM_004491473.1	#has_ATP_binding|#has_unfolded_protein_binding|#involved_in_protein_folding|#located_in_Golgi_apparatus|#located_in_apoplast|#located_in_cell_wall|#located_in_chloroplast_stroma|#located_in_cytoplasm|#located_in_plasma_membrane|#located_in_vacuolar_membrane	PTZ00272-PTZ00272|cd00075-HATPase_c|cl00075-HATPase_c|cl20204-HSP90	--	--
Ca_05651	Ca_05651.1|Ca_LG_3:10605820-10607048|plus|	-2.17893	0.0427833	no	NA	NA	NA	10605820	10607048	+	Glutathione S-transferase family protein	PTHR11260 PTHR11260	IPR004045 IPR004046 IPR010987 IPR012336	PF00043 PF13417	GO:0005515	PS50404 PS50405	SSF47616 SSF52833	Probable_glutathione_S-transferase	XM_004492324.1	#involved_in_response_to_cadmium_ion|#located_in_cytoplasm	COG0625-Gst|cd03058-GST_N_Tau|cd03185-GST_C_Tau|cl00388-Thioredoxin_like|cl02776-GST_C_family	--	--
Ca_18395	Ca_18395.1|Ca_LG_6:46095803-46101340|minus|	-2.31453	0.0427833	no	NA	NA	NA	46095803	46101340	-	serine carboxypeptidase-like 48	PTHR11802 PTHR11802	IPR001563 IPR018202	PF00450	GO:0004185 GO:0006508	PS00131 PS00560	SSF53474	Serine_carboxypeptidase-like	XM_004506003.1	#has_serine-type_carboxypeptidase_activity|#involved_in_proteolysis|#located_in_extracellular_region	cl08270-Peptidase_S10	--	--
Ca_00574	Ca_00574.1|Ca_LG_1:6182256-6184641|minus|	-3.28575	0.0428006	no	NA	NA	NA	6182256	6184641	-	dentin sialophosphoprotein-like isoform X2 [Glycine max]		IPR007789	PF05097				--	XM_004487196.1	#located_in_nucleus	cl04934-DUF688	--	--
Ca_00588	Ca_00588.1|Ca_LG_1:6334034-6337632|plus|	1.28788	0.0428006	no	NA	NA	NA	6334034	6337632	+	protein YLS7 [Glycine max]	PTHR32285	IPR025846 IPR026057	PF13839 PF14416				Protein_YLS7	XM_004487112.1	#located_in_plasmodesma|#located_in_vacuole	cl01053-SGNH_hydrolase|cl16865-PMR5N	--	--
Ca_02636	Ca_02636.1|Ca_LG_1:37533689-37534239|minus|	2.17227	0.0428006	no	NA	NA	NA	37533689	37534239	-	Quinone reductase family protein	PTHR30546	IPR005025 IPR008254 IPR010089	PF03358	GO:0010181 GO:0016491 GO:0045892	PS50902	SSF52218	NAD(P)H_dehydrogenase_(quinone)	XM_004485623.1	#has_FMN_binding|#has_oxidoreductase_activity|#involved_in_negative_regulation_of_transcription,_DNA-dependent|#located_in_cytoplasm|#located_in_plasma_membrane|#located_in_plasmodesma	cl00438-FMN_red	--	--
Ca_03301	Ca_03301.1|Ca_LG_2:4697163-4699337|plus|	-5.64522	0.0428006	no	NA	NA	NA	4697163	4699337	+	cation/H+ exchanger 4	PTHR32468 PTHR32468	IPR006153	PF00999	GO:0006812 GO:0015299 GO:0016021 GO:0055085			Cation/H(+)_antiporter_4	XM_004491156.1	#has_solute:hydrogen_antiporter_activity|#has_transferase_activity,_transferring_acyl_groups|#involved_in_cation_transport|#involved_in_metabolic_process|#involved_in_transmembrane_transport|#located_in_integral_to_membrane	PLN03159-PLN03159|cl21520-Asp-Al_Ex	--	--
Ca_03676	Ca_03676.1|Ca_LG_2:9875131-9881508|minus|	-2.20747	0.0428006	no	NA	NA	NA	9875131	9881508	-	ATP binding / kinase/ protein serine / threonine kinase n=3 Tax=Vitis vinifera RepID=C5DB47_VITVI	PTHR24420 PTHR24420	IPR000719 IPR001611 IPR002290 IPR008271 IPR011009 IPR013320 IPR017441	PF00069 PF00560	GO:0004672 GO:0004674 GO:0005515	PS00107 PS00108 PS50011	SSF52058 SSF56112	Putative_leucine-rich_repeat_receptor-like_serine/threonine-protein_kinase_At3g53590	XM_004490675.1	#has_ATP_binding|#has_protein_kinase_activity|#has_protein_serine/threonine_kinase_activity|#has_transferase_activity,_transferring_phosphorus-containing_groups|#involved_in_protein_phosphorylation|#located_in_plasma_membrane	cd14066-STKc_IRAK|cl21453-PKc_like|cl22710-LRR_RI|smart00221-STYKc	--	--
Ca_06609	Ca_06609.1|Ca_LG_3:27962235-27965390|plus|	-1.8677	0.0428006	no	NA	NA	NA	27962235	27965390	+	annexin 5	PTHR10502 PTHR10502	IPR001464 IPR009118 IPR018252 IPR018502	PF00191	GO:0005509 GO:0005544	PS00223	SSF47874	Annexin_D5	XM_004513284.1	#has_calcium_ion_binding|#has_calcium-dependent_phospholipid_binding	cl02574-Annexin	MYB	--
Ca_14897	Ca_14897.1|Ca_LG_5:42589635-42592963|plus|	-2.00576	0.0428006	no	NA	NA	NA	42589635	42592963	+	c("Vacuolar import/degradation"	PTHR31913	IPR013863 IPR015943	PF08553	GO:0005515		SSF10190	Protein_CYPRO4	XM_004501512.1	#located_in_cytoplasm	cl19884-VID27	--	--
Ca_07950	Ca_07950.1|Ca_LG_3:41474259-41480732|plus|	-2.55918	0.0428034	no	NA	NA	NA	41474259	41480732	+	ATP binding microtubule motor family protein	PTHR24115 PTHR24115	IPR001715 IPR001752 IPR019821 IPR027417 IPR027640	PF00225 PF00307	GO:0003777 GO:0005515 GO:0005524 GO:0005871 GO:0007018 GO:0008017	PS00411 PS50021 PS50067	SSF47576 SSF52540	Kinesin-4	XM_004494501.1	#has_ATP_binding|#has_microtubule_motor_activity|#involved_in_microtubule-based_movement|#located_in_cytoplasm	COG5059-KIP1|cd01366-KISc_C_terminal|cl00030-CH|cl00286-Motor_domain|smart00033-CH	--	--
Ca_04425	Ca_04425.1|Ca_LG_2:24702186-24707487|minus|	2.6204	0.0429459	no	NA	NA	NA	24702186	24707487	-	glycine-rich protein	PTHR24031 PTHR24031						--	XM_004489910.1	#located_in_chloroplast|#located_in_cytosol	--	--	--
Ca_10968	Ca_10968.1|Ca_LG_4:37074003-37081777|minus|	-2.66156	0.0429574	no	NA	NA	NA	37074003	37081777	-	electron carrier/protein disulfide oxidoreductase	PTHR23054 PTHR23054	IPR000591 IPR002109 IPR006869 IPR011991 IPR012336	PF00462 PF00610 PF04784	GO:0009055 GO:0015035 GO:0035556 GO:0045454	PS51354	SSF46785 SSF52833	--	XM_004513544.1	#has_electron_carrier_activity|#has_protein_disulfide_oxidoreductase_activity|#involved_in_cell_redox_homeostasis|#involved_in_intracellular_signal_transduction|#located_in_nucleus	cd04371-DEP|cl00388-Thioredoxin_like|cl02442-DEP|cl04748-DUF547	--	--
Ca_14207	Ca_14207.1|Ca_LG_5:35823537-35825207|plus|	3.75065	0.0429574	no	NA	NA	NA	35823537	35825207	+	dof zinc finger protein DOF5.6 [Glycine max]	PTHR31992 PTHR31992	IPR003851	PF02701	GO:0003677 GO:0006355	PS01361 PS50884		Dof_zinc_finger_protein_DOF4.6	XM_004502630.1	#has_DNA_binding|#has_zinc_ion_binding|#involved_in_regulation_of_transcription,_DNA-dependent|#located_in_nucleus	COG3677-COG3677|cl03664-zf-Dof	Dof	--
Ca_05255	Ca_05255.1|Ca_LG_3:3046491-3049361|minus|	-3.55943	0.0430639	no	NA	NA	NA	3046491	3049361	-	ferritin 4	PTHR11431 PTHR11431	IPR001519 IPR008331 IPR009040 IPR009078 IPR012347 IPR014034	PF00210	GO:0006826 GO:0006879 GO:0008199	PS00204 PS00540 PS50905	SSF47240	Ferritin-1,_chloroplastic	XM_004492435.1	#has_ferric_iron_binding|#has_oxidoreductase_activity|#has_transition_metal_ion_binding|#involved_in_cellular_iron_ion_homeostasis|#involved_in_iron_ion_transport|#involved_in_oxidation-reduction_process|#located_in_chloroplast|#located_in_chloroplast_stroma|#located_in_chloroplast_thylakoid_membrane|#located_in_membrane|#located_in_thylakoid	cd01056-Euk_Ferritin|cl00264-Ferritin_like	--	--
Ca_12174	Ca_12174.1|Ca_LG_5:5212266-5214335|minus|	-3.81087	0.0430639	no	NA	NA	NA	5212266	5214335	-	probable pectinesterase/pectinesterase inhibitor 33-like [Glycine max]	PTHR31707 PTHR31707	IPR000070 IPR006501 IPR011050 IPR012334 IPR018040	PF01095 PF04043	GO:0004857 GO:0005618 GO:0030599 GO:0042545	PS00503	SSF10114 SSF51126	Probable_pectinesterase/pectinesterase_inhibitor_59	XM_004499599.1	#has_enzyme_inhibitor_activity|#has_pectinesterase_activity|#involved_in_cell_wall_modification|#located_in_cell_wall|#located_in_extracellular_region	cd15798-PMEI-like_3|cl01911-Pectinesterase|cl04375-PMEI_like	--	--
Ca_21495	Ca_21495.1|Ca_LG_7:38533190-38544533|plus|	-1.54843	0.0430639	no	NA	NA	NA	38533190	38544533	+	Bifunctional dethiobiotin synthetase/adenosylmethionine-8-amino-7-oxononanoate aminotransferase n=2 Tax=Saprolegnia RepID=E6PBR3_SAPPC	PTHR11986 PTHR11986	IPR004472 IPR005814 IPR015421 IPR015422 IPR015424 IPR027417	PF00202 PF13500	GO:0000287 GO:0003824 GO:0004141 GO:0005524 GO:0008483 GO:0009102 GO:0030170	PS00600	SSF52540 SSF53383	Bifunctional_dethiobiotin_synthetase/7,8-diamino-pelargonic_acid_aminotransferase,_mitochondrial_	XM_004507772.1	--	PLN02974-PLN02974|cl18945-AAT_I|cl21455-ABC_ATPase	--	--
Ca_27266	Ca_27266.1|scaffold07621:4330-6391|plus|	1.6211	0.0430697	no	NA	NA	NA	4330	6391	+	ascorbate peroxidase 1	PTHR31356 PTHR31356	IPR002016 IPR002207 IPR010255 IPR019793 IPR019794	PF00141	GO:0004601 GO:0006979 GO:0020037 GO:0055114	PS00435 PS00436 PS50873	SSF48113	L-ascorbate_peroxidase,_cytosolic	XM_004505887.1	#has_heme_binding|#has_peroxidase_activity|#involved_in_oxidation-reduction_process|#involved_in_response_to_oxidative_stress|#involved_in_response_to_salt_stress|#located_in_Golgi_apparatus|#located_in_chloroplast|#located_in_cytoplasm|#located_in_cytosol|#located_in_plasma_membrane|#located_in_plasmodesma	cd00691-ascorbate_peroxidase|cl00196-plant_peroxidase_like	MYB-related	--
Ca_07582	Ca_07582.1|Ca_LG_3:38062323-38068659|plus|	5.8389	0.0430707	no	NA	NA	NA	38062323	38068659	+	interaptin-like isoform X5 [Glycine max]	PTHR32258 PTHR32258	IPR011684	PF07765				--	XM_004493641.1	#located_in_plasma_membrane	COG1196-Smc|cl06684-KIP1	--	--
Ca_16367	Ca_16367.1|Ca_LG_6:13554928-13557773|plus|	6.06776	0.0430707	no	NA	NA	NA	13554928	13557773	+	GDSL-like Lipase/Acylhydrolase superfamily protein	PTHR22835	IPR001087 IPR013831	PF00657	GO:0006629 GO:0016787 GO:0016788			GDSL_esterase/lipase_At5g45960	XM_004505059.1	#has_hydrolase_activity,_acting_on_ester_bonds|#involved_in_lipid_metabolic_process|#located_in_extracellular_region	cd01837-SGNH_plant_lipase_like|cl01053-SGNH_hydrolase	--	--
Ca_21014	Ca_21014.1|Ca_LG_7:33295596-33298249|minus|	-1.66525	0.0430707	no	NA	NA	NA	33295596	33298249	-	AUTOPHAGY 8E	PTHR10969	IPR004241	PF02991			SSF54236	Autophagy-related_protein_8f_	NM_001279004.1	--	cd01611-GABARAP|cl00155-UBQ	--	--
Ca_24454	Ca_24454.1|scaffold01453:59341-66251|plus|	1.47967	0.0430707	no	NA	NA	NA	59341	66251	+	serine hydroxymethyltransferase 2	PTHR11680 PTHR11680	IPR001085 IPR015421 IPR015422 IPR015424 IPR019798	PF00464	GO:0003824 GO:0004372 GO:0006544 GO:0006563 GO:0030170	PS00096	SSF53383	Serine_hydroxymethyltransferase_4	XM_004490411.1	#involved_in_response_to_cadmium_ion|#located_in_cytoplasm|#located_in_cytosol|#located_in_membrane|#located_in_plasma_membrane|#located_in_plasmodesma	cd00378-SHMT|cl18945-AAT_I	--	--
Ca_04767	Ca_04767.1|Ca_LG_2:29231764-29236986|minus|	-1.67825	0.0431659	no	NA	NA	NA	29231764	29236986	-	protein LONGIFOLIA 2-like isoform X1 [Glycine max]	PTHR31680 PTHR31680	IPR025486	PF14309				Protein_LONGIFOLIA_1	XM_004489413.1	#located_in_nucleus	cl16789-DUF4378	--	--
Ca_18889	Ca_18889.1|Ca_LG_6:53150015-53154100|minus|	1.78494	0.0431659	no	NA	NA	NA	53150015	53154100	-	D-3-phosphoglycerate dehydrogenase	PTHR10996 PTHR10996	IPR002912 IPR006139 IPR006140 IPR006236 IPR015878 IPR016040	PF00389 PF01842 PF02826		PS00065 PS00670 PS00671 PS51671	SSF14354 SSF51735 SSF52283	D-3-phosphoglycerate_dehydrogenase,_chloroplastic	XM_004507476.1	#has_NAD_binding|#has_amino_acid_binding|#has_cofactor_binding|#has_nucleotide_binding|#has_oxidoreductase_activity,_acting_on_the_CH-OH_group_of_donors,_NAD_or_NADP_as_acceptor|#has_phosphoglycerate_dehydrogenase_activity|#involved_in_L-serine_biosynthetic_process|#involved_in_metabolic_process|#involved_in_oxidation-reduction_process|#located_in_chloroplast|#located_in_chloroplast_stroma	PRK13581-PRK13581|cd04902-ACT_3PGDH-xct|cd12173-PGDH_4|cl09141-ACT|cl21454-SDR	--	--
Ca_24364	Ca_24364.1|scaffold01265:13939-16314|minus|	-1.63922	0.0431659	no	NA	NA	NA	13939	16314	-	hypothetical protein							--	EU835853.1	--	--	--	--
Ca_23589	Ca_23589.1|Ca_LG_8:17271226-17274913|minus|	-1.70731	0.0438955	no	NA	NA	NA	17271226	17274913	-	ubiquitin carboxyl-terminal hydrolase-like protein	PTHR24006 PTHR24006	IPR001394 IPR018200 IPR028889	PF00443	GO:0006511	PS00972 PS00973 PS50235	SSF54001	Ubiquitin_carboxyl-terminal_hydrolase_20	XM_004512467.1	#has_ubiquitin_thiolesterase_activity|#involved_in_ubiquitin-dependent_protein_catabolic_process|#located_in_nucleus	cl02553-Peptidase_C19	--	--
Ca_27804	Ca_27804.1|scaffold10704:2640-3404|minus|	-5.79935	0.0439694	no	NA	NA	NA	2640	3404	-	uncharacterized protein LOC102664679 isoform X1 [Glycine max]		IPR005162	PF03732				--	AJ411813.1	--	cl04237-Retrotrans_gag	--	--
Ca_05478	Ca_05478.1|Ca_LG_3:7100679-7103060|minus|	-2.30716	0.0441766	no	NA	NA	NA	7100679	7103060	-	Pentatricopeptide repeat (PPR) superfamily protein	PTHR24015 PTHR24015	IPR002885 IPR011990	PF01535 PF13041 PF14432	GO:0005515	PS51375		Pentatricopeptide_repeat-containing_protein_At1g15510,_chloroplastic	XM_004506826.1	#located_in_chloroplast	PLN03077-PLN03077|TIGR00756-PPR|cl03252-PPR|cl16877-DYW_deaminase	--	--
Ca_07891	Ca_07891.1|Ca_LG_3:40936294-40936982|minus|	-1.90155	0.0441766	no	NA	NA	NA	40936294	40936982	-	unknown protein							--	XM_004494179.1	#located_in_mitochondrion	--	--	--
Ca_02597	Ca_02597.1|Ca_LG_1:37241875-37245615|plus|	2.55158	0.0443362	no	NA	NA	NA	37241875	37245615	+	heat shock protein 70	PTHR19375	IPR012725 IPR013126 IPR018181	PF00012	GO:0005524 GO:0006457 GO:0051082	PS00297 PS00329 PS01036	SSF10092 SSF10093 SSF53067	Chaperone_protein_DnaK	XM_004485573.1	#has_ATP_binding|#has_unfolded_protein_binding|#involved_in_protein_folding|#involved_in_response_to_cadmium_ion|#located_in_apoplast|#located_in_chloroplast|#located_in_chloroplast_envelope|#located_in_chloroplast_stroma|#located_in_thylakoid	PRK00290-dnaK|cd11733-HSPA9-like_NBD|cl17037-NBD_sugar-kinase_HSP70_actin	--	--
Ca_03252	Ca_03252.1|Ca_LG_2:4150353-4154458|plus|	3.80561	0.0443362	no	NA	NA	NA	4150353	4154458	+	WRKY family transcription factor family protein	PTHR31221 PTHR31221	IPR003657	PF03106	GO:0003700 GO:0006355 GO:0043565	PS50811	SSF11829	Probable_WRKY_transcription_factor_20	XM_004491417.1	#has_sequence-specific_DNA_binding|#has_sequence-specific_DNA_binding_transcription_factor_activity|#involved_in_regulation_of_transcription,_DNA-dependent|#located_in_nucleus	cl03892-WRKY	WRKY	--
Ca_16182	Ca_16182.1|Ca_LG_6:11180025-11181373|minus|	-2.35037	0.0448173	no	NA	NA	NA	11180025	11181373	-	Cysteine proteinases superfamily protein	PTHR12411 PTHR12411	IPR000668 IPR013128 IPR013201 IPR025661	PF00112 PF08246	GO:0006508 GO:0008234	PS00640	SSF54001	P34_probable_thiol_protease	XM_004504363.1	#has_cysteine-type_peptidase_activity|#involved_in_proteolysis|#involved_in_response_to_salt_stress|#located_in_cytosol|#located_in_extracellular_region|#located_in_vacuole	cd02248-Peptidase_C1A|cl00296-Peptidase_C1|cl22448-Inhibitor_I29|smart00848-Inhibitor_I29	--	--
Ca_01150	Ca_01150.1|Ca_LG_1:14504135-14506947|plus|	-1.38809	0.0449087	no	NA	NA	NA	14504135	14506947	+	tetratricopeptide repeat protein 1-like isoform X1 [Glycine max]	PTHR22904 PTHR22904	IPR011990 IPR013026 IPR019734	PF13414	GO:0005515	PS50293	SSF48452	Protein_unc-45_homolog_A	XM_004488745.1	#located_in_cytoplasm	cd00189-TPR|cl22441-TPR	--	--
Ca_11442	Ca_11442.1|Ca_LG_4:46583084-46584061|plus|	-1.94912	0.0451183	no	NA	NA	NA	46583084	46584061	+	seed maturation protein		IPR005513	PF03760	GO:0009790			18_kDa_seed_maturation_protein	XM_004497841.1	#involved_in_embryo_development	cl04248-LEA_1	MYB-related	--
Ca_18767	Ca_18767.1|Ca_LG_6:51479067-51480934|minus|	-5.5488	0.0451183	no	NA	NA	NA	51479067	51480934	-	Protein of unknown function (DUF677)	PTHR31113 PTHR31113	IPR007749	PF05055				UPF0496_protein_At4g34320	XM_004507352.1	#has_protein_modification_of_type_N-terminal_protein_myristoylation	cl21731-DUF677	--	--
Ca_01815	Ca_01815.1|Ca_LG_1:28392264-28393614|plus|	-1.61619	0.0455395	no	NA	NA	NA	28392264	28393614	+	uncharacterized protein LOC102669274 [Glycine max]							--	XM_004514065.1	--	cd00303-retropepsin_like|cl11403-pepsin_retropepsin_like	--	--
Ca_00121	Ca_00121.1|Ca_LG_1:1511814-1514833|minus|	4.03698	0.0457257	no	NA	NA	NA	1511814	1514833	-	Protein kinase superfamily protein	PTHR24420	IPR000719 IPR001245 IPR002290 IPR008271 IPR011009 IPR013320	PF07714	GO:0004672 GO:0004674 GO:0005524 GO:0006468 GO:0016772	PS00108 PS50011	SSF56112	Probable_receptor-like_protein_kinase_At1g80640	XM_004486568.1	#has_ATP_binding|#has_protein_kinase_activity|#has_transferase_activity,_transferring_phosphorus-containing_groups|#involved_in_protein_phosphorylation|#located_in_plasma_membrane	cl21453-PKc_like|smart00219-TyrKc	--	--
Ca_04485	Ca_04485.1|Ca_LG_2:25700683-25702439|plus|	-1.94001	0.0457257	no	NA	NA	NA	25700683	25702439	+	Protein of unknown function (DUF1262)	PTHR31050	IPR010683	PF06880				--	XM_003613312.1	--	cl06095-DUF1262	--	--
Ca_14699	Ca_14699.1|Ca_LG_5:40500703-40504076|minus|	1.86638	0.0457257	no	NA	NA	NA	40500703	40504076	-	ATP binding/protein serine/threonine kinase [Glycine max]	PTHR24420 PTHR24420	IPR000719 IPR001611 IPR002290 IPR003591 IPR008271 IPR011009 IPR013210 IPR017441 IPR025875	PF00069 PF08263 PF12799 PF13516 PF13855		PS00107 PS00108 PS50011 PS51450		Receptor-like_protein_kinase_HSL1	XM_004501034.1	#has_ATP_binding|#has_protein_kinase_activity|#has_protein_serine/threonine_kinase_activity|#has_transferase_activity,_transferring_phosphorus-containing_groups|#involved_in_protein_phosphorylation|#located_in_membrane|#located_in_plasma_membrane	PLN00113-PLN00113|cl21453-PKc_like	--	--
Ca_18785	Ca_18785.1|Ca_LG_6:51734694-51736769|plus|	-4.36141	0.0457257	no	NA	NA	NA	51734694	51736769	+	dentin sialophosphoprotein-like isoform X2 [Glycine max]		IPR012417	PF07839	GO:0005516			--	XM_004507462.1	#has_calmodulin_binding|#located_in_nucleus	cl22702-CaM_binding	--	--
Ca_14737	Ca_14737.1|Ca_LG_5:40919478-40923457|minus|	-2.52501	0.0458255	no	NA	NA	NA	40919478	40923457	-	aminoacyl-tRNA synthetase							--	XM_004501204.1	#located_in_nucleus	COG5406-COG5406	--	--
Ca_06523	Ca_06523.1|Ca_LG_3:26895092-26895795|minus|	-2.00924	0.045866	no	NA	NA	NA	26895092	26895795	-	RING-H2 finger protein 2B	PTHR14155	IPR001841 IPR013083	PF13639	GO:0005515 GO:0008270	PS50089	SSF57850	RING-H2_zinc_finger_protein_RHA1a	XM_004492715.1	#has_zinc_ion_binding|#located_in_nucleus	cd00162-RING|cl17238-RING	--	--
Ca_12566	Ca_12566.1|Ca_LG_5:11959258-11962943|minus|	-2.54936	0.0459306	no	NA	NA	NA	11959258	11962943	-	protein FAR1-RELATED SEQUENCE 5-like [Glycine max]	PTHR31669	IPR018289	PF10551				Protein_FAR1-RELATED_SEQUENCE_5	XM_004500469.1	#has_zinc_ion_binding|#located_in_nucleus	cl07376-AFT|cl19537-Transposase_mut	--	--
Ca_15577	Ca_15577.1|Ca_LG_6:4605438-4606293|plus|	2.56798	0.0463279	no	NA	NA	NA	4605438	4606293	+	hypothetical protein							--	XM_004503577.1	--	--	--	--
Ca_02751	Ca_02751.1|Ca_LG_1:38696892-38697808|minus|	-2.87133	0.0464126	no	NA	NA	NA	38696892	38697808	-	Protein of unknown function (DUF761)		IPR008480 IPR025520	PF05553 PF14364				--	XM_004485657.1	#located_in_chloroplast	cl05229-DUF761|cl16829-DUF4408	--	--
Ca_01277	Ca_01277.1|Ca_LG_1:17453717-17456523|minus|	6.06543	0.0468198	no	NA	NA	NA	17453717	17456523	-	Oxysterol-binding family protein	PTHR10972	IPR000648	PF01237			SSF14400	Oxysterol-binding_protein-related_protein_4B_	XM_004487920.1	--	cl03136-Oxysterol_BP	--	--
Ca_02431	Ca_02431.1|Ca_LG_1:35764245-35766096|minus|	-1.50485	0.0468198	no	NA	NA	NA	35764245	35766096	-	serine/threonine-protein kinase TIO-like [Glycine max]	PTHR24347 PTHR24347	IPR000719 IPR002290 IPR004041 IPR008271 IPR011009 IPR017441 IPR018451 IPR020636	PF00069 PF03822	GO:0004672 GO:0004674 GO:0005524 GO:0006468 GO:0007165	PS00107 PS00108 PS50011 PS50816	SSF56112	CBL-interacting_protein_kinase_5	XM_004485849.1	#has_ATP_binding|#has_protein_kinase_activity|#has_protein_serine/threonine_kinase_activity|#has_transferase_activity,_transferring_phosphorus-containing_groups|#involved_in_protein_phosphorylation|#involved_in_signal_transduction|#located_in_plasma_membrane	cd12195-CIPK_C|cd14663-STKc_SnRK3|cl17070-AMPKA_C_like|cl21453-PKc_like|smart00220-S_TKc	--	--
Ca_03197	Ca_03197.1|Ca_LG_2:3560026-3561190|minus|	-6.05033	0.0469657	no	NA	NA	NA	3560026	3561190	-	MtN14 protein n=1 Tax=Medicago truncatula RepID=G7K500_MEDTR							--	XR_189468.1	--	--	--	--
Ca_20372	Ca_20372.1|Ca_LG_7:24658724-24659852|minus|	-1.61407	0.0471544	no	NA	NA	NA	24658724	24659852	-	inositol polyphosphate kinase 2 alpha	PTHR12400	IPR005522	PF03770	GO:0008440		SSF56104	Inositol_polyphosphate_multikinase_beta	XM_004510783.1	#has_inositol-1,4,5-trisphosphate_3-kinase_activity|#located_in_plasma_membrane	PLN02667-PLN02667|cl12283-IPK	--	--
Ca_22649	Ca_22649.1|Ca_LG_8:5793681-5796270|minus|	-1.41813	0.0474154	no	NA	NA	NA	5793681	5796270	-	expansin-like B1	PTHR31692	IPR005795 IPR007112 IPR007117 IPR007118 IPR009009 IPR014733	PF01357 PF03330	GO:0005576 GO:0019953	PS50842 PS50843	SSF49590 SSF50685	Expansin-like_B1	XM_004511681.1	#involved_in_sexual_reproduction|#located_in_extracellular_region	PLN03023-PLN03023|cl04011-DPBB_1|cl08320-Pollen_allerg_1	--	--
Ca_05705	Ca_05705.1|Ca_LG_3:11763072-11773284|minus|	2.21866	0.0474161	no	NA	NA	NA	11763072	11773284	-	ADP-ribosylation factor GTPase-activating protein AGD10	PTHR23180 PTHR23180	IPR001164 IPR001849 IPR002110 IPR004148 IPR011993 IPR020683 IPR027267	PF00169 PF01412 PF03114 PF12796		PS50003 PS50088 PS50115 PS50297		ADP-ribosylation_factor_GTPase-activating_protein_AGD2	XM_004491964.1	#has_ARF_GTPase_activator_activity|#has_phospholipid_binding|#has_zinc_ion_binding|#involved_in_regulation_of_ARF_GTPase_activity|#located_in_Golgi_apparatus|#located_in_cytoplasm	COG0666-Arp|cd00204-ANK|cd07606-BAR_SFC_plant|cd13250-PH_ACAP|cl02464-ArfGap|cl02529-ANK|cl12013-BAR|cl17171-PH-like	--	--
Ca_02995	Ca_02995.1|Ca_LG_2:1786020-1787717|plus|	1.41836	0.0475282	no	NA	NA	NA	1786020	1787717	+	tropomyosin-like [Glycine max]							--	XM_004491288.1	#located_in_vacuolar_membrane	TIGR02168-Chromosome_partition_protein_Smc	--	--
Ca_11015	Ca_11015.1|Ca_LG_4:37991491-38001891|minus|	1.31498	0.0475282	no	NA	NA	NA	37991491	38001891	-	Protein kinase superfamily protein	PTHR23257 PTHR23257	IPR000270 IPR000719 IPR001245 IPR002290 IPR008271 IPR011009 IPR017441	PF00564 PF07714	GO:0004672 GO:0004674	PS00107 PS00108 PS50011	SSF54277 SSF56112	Serine/threonine-protein_kinase_EDR1	XM_004516183.1	#has_ATP_binding|#has_protein_kinase_activity|#has_protein_serine/threonine_kinase_activity|#has_transferase_activity,_transferring_phosphorus-containing_groups|#involved_in_protein_phosphorylation|#located_in_plasma_membrane	cd06410-PB1_UP2|cd13999-STKc_MAP3K-like|cl02720-PB1|cl21453-PKc_like	--	--
Ca_08789	Ca_08789.1|Ca_LG_4:9545587-9550762|plus|	2.47363	0.0476268	no	NA	NA	NA	9545587	9550762	+	mannosyl-oligosaccharide glucosidase	PTHR10412 PTHR10412	IPR004888 IPR008928	PF03200	GO:0003824 GO:0004573 GO:0009311		SSF48208	Mannosyl-oligosaccharide_glucosidase_GCS1	XM_004504404.1	#has_catalytic_activity|#has_mannosyl-oligosaccharide_glucosidase_activity|#involved_in_oligosaccharide_metabolic_process	cl17346-Trehalase	--	--
Ca_17168	Ca_17168.1|Ca_LG_6:22850765-22851392|minus|	-3.48705	0.0477681	no	NA	NA	NA	22850765	22851392	-	GRF zinc finger protein		IPR010666	PF06839	GO:0008270			--	XM_004506864.1	--	cl06070-zf-GRF	--	--
Ca_02888	Ca_02888.1|Ca_LG_2:249369-256122|plus|	-1.64466	0.0479713	no	NA	NA	NA	249369	256122	+	protein FAR1-RELATED SEQUENCE 2-like isoform X3 [Glycine max]	PTHR31669 PTHR31669	IPR004330 IPR005123 IPR006564 IPR006620 IPR007527	PF03101 PF04434 PF13640	GO:0005506 GO:0008270 GO:0016491 GO:0016705 GO:0016706 GO:0031418 GO:0055114	PS50966		Protein_FAR-RED_IMPAIRED_RESPONSE_1	XM_004496835.1	#has_zinc_ion_binding|#located_in_nucleus	cl03890-FAR1|cl19527-SWIM|cl21496-2OG-FeII_Oxy|smart00575-ZnF_PMZ|smart00702-P4Hc	FAR1	--
Ca_07223	Ca_07223.1|Ca_LG_3:34755576-34761817|plus|	-1.57855	0.0479785	no	NA	NA	NA	34755576	34761817	+	probable serine/threonine protein phosphatase 2A regulatory subunit B''delta-like isoform X3 [Glycine max]	PTHR14095	IPR002048 IPR011992 IPR018247	PF13499	GO:0005509	PS00018 PS50222	SSF47473	Probable_serine/threonine_protein_phosphatase_2A_regulatory_subunit_B''epsilon	XM_004494694.1	#has_calcium_ion_binding|#located_in_nucleus	--	--	--
Ca_26879	Ca_26879.1|scaffold06101:398-6591|plus|	-3.01825	0.0479785	no	NA	NA	NA	398	6591	+	flap endonuclease GEN-like protein	PTHR11081 PTHR11081	IPR000953 IPR006084 IPR006085 IPR006086 IPR016197 IPR020045	PF00752 PF00867	GO:0003677 GO:0003824 GO:0004518 GO:0006281	PS50013	SSF47807 SSF54160 SSF88723	Flap_endonuclease_GEN-like_2	XM_004515643.1	#has_DNA_binding|#has_catalytic_activity|#has_nuclease_activity|#involved_in_DNA_repair|#located_in_nucleus	cd09900-H3TH_XPG-like|cl14812-PIN_SF|cl22433-H3TH_StructSpec-5&apos;-nucleases	--	--
Ca_05337	Ca_05337.1|Ca_LG_3:4512106-4513512|minus|	3.20028	0.0481051	no	NA	NA	NA	4512106	4513512	-	UDP-glucosyltransferase family protein	PTHR11926 PTHR11926	IPR002213	PF00201	GO:0008152 GO:0016758	PS00375	SSF53756	Hydroquinone_glucosyltransferase	KF018247.1	#has_transferase_activity,_transferring_hexosyl_groups|#involved_in_metabolic_process|#involved_in_response_to_salt_stress|#located_in_nucleus	PLN02992-PLN02992|cl21512-Glycos_transf_1	--	--
Ca_08157	Ca_08157.1|Ca_LG_4:1967056-1968557|plus|	-2.34932	0.0481051	no	NA	NA	NA	1967056	1968557	+	galactinol synthase 1	PTHR11183	IPR002495	PF01501	GO:0016757		SSF53448	Galactinol_synthase_2	XM_004495577.1	#located_in_nucleus	COG1442-RfaJ|cd02537-GT8_Glycogenin|cl11394-Glyco_tranf_GTA_type	--	--
Ca_08450	Ca_08450.1|Ca_LG_4:5781831-5787131|minus|	2.44465	0.0481051	no	NA	NA	NA	5781831	5787131	-	heat shock protein 90.1	PTHR11528 PTHR11528	IPR001404 IPR003594 IPR015566 IPR019805 IPR020568 IPR020575	PF00183 PF13589	GO:0005524 GO:0006457 GO:0006950 GO:0051082	PS00298	SSF11094 SSF54211 SSF55874	Heat_shock_protein_90_homolog	XM_004499225.1	#has_ATP_binding|#has_unfolded_protein_binding|#involved_in_protein_folding|#located_in_Golgi_apparatus|#located_in_cytoplasm|#located_in_membrane|#located_in_nucleolus|#located_in_plasma_membrane	PRK05218-PRK05218|cd00075-HATPase_c|cl00075-HATPase_c|cl20204-HSP90	--	--
Ca_21435	Ca_21435.1|Ca_LG_7:37838131-37841033|plus|	1.44058	0.0487929	no	NA	NA	NA	37838131	37841033	+	RNA binding (RRM/RBD/RNP motifs) family protein	PTHR24012 PTHR24012	IPR000504 IPR012677	PF00076	GO:0000166 GO:0003676	PS50102	SSF54928	Glycine-rich_RNA-binding_protein_3,_mitochondrial	XM_004508617.1	#functions_in_ATP_binding|#has_nucleic_acid_binding|#has_nucleotide_binding|#located_in_mitochondrion	cd12399-RRM_HP0827_like|cl17169-RRM_SF|smart00360-RRM	--	--
Ca_07116	Ca_07116.1|Ca_LG_3:33795637-33801022|minus|	2.38609	0.0492927	no	NA	NA	NA	33795637	33801022	-	sucrose synthase 3	PTHR12526 PTHR12526	IPR000368 IPR001296 IPR012820	PF00534 PF00862	GO:0005985 GO:0009058 GO:0016157		SSF53756	Sucrose_synthase_5	XM_004494334.1	#has_sucrose_synthase_activity|#involved_in_biosynthetic_process|#involved_in_sucrose_metabolic_process|#located_in_chloroplast	PLN00142-PLN00142|cl21512-Glycos_transf_1	--	--
Ca_02072	Ca_02072.1|Ca_LG_1:31921368-31928041|minus|	-1.36798	0.0494376	no	NA	NA	NA	31921368	31928041	-	regulatory protein NPR1	PTHR24413 PTHR24413	IPR000210 IPR002110 IPR011333 IPR013069 IPR020683 IPR021094 IPR024228	PF00651 PF11900 PF12313 PF13637	GO:0005515 GO:0009863 GO:0009611 GO:0050832	PS50088 PS50097 PS50297	SSF48403 SSF54695	Regulatory_protein_NPR4	XM_004486377.1	#located_in_nucleus	cd00204-ANK|cl02518-BTB|cl02529-ANK|cl13357-DUF3420|cl13712-NPR1_like_C	--	--
Ca_03786	Ca_03786.1|Ca_LG_2:11604270-11606754|minus|	6.19356	0.0497541	no	NA	NA	NA	11604270	11606754	-	Cytochrome P450 superfamily protein	PTHR24298 PTHR24298	IPR001128 IPR002401 IPR017972	PF00067	GO:0005506 GO:0016705 GO:0020037 GO:0055114	PS00086	SSF48264	Cytochrome_P450_83B1	XM_004490601.1	#has_electron_carrier_activity|#has_heme_binding|#has_iron_ion_binding|#has_oxidoreductase_activity,_acting_on_paired_donors,_with_incorporation_or_reduction_of_molecular_oxygen|#involved_in_oxidation-reduction_process|#located_in_membrane|#located_in_plasma_membrane	cl12078-p450	--	--
Ca_16741	Ca_16741.1|Ca_LG_6:17845828-17848942|plus|	-4.15529	0.049782	no	NA	NA	NA	17845828	17848942	+	sugar porter (SP) family MFS transporter	PTHR24063 PTHR24063	IPR003663 IPR005828 IPR005829 IPR016196 IPR020846	PF00083	GO:0005215 GO:0006810 GO:0016020 GO:0016021 GO:0022857 GO:0022891 GO:0055085	PS00216 PS00217 PS50850	SSF10347	Sugar_transport_protein_7	XM_004504961.1	#has_substrate-specific_transmembrane_transporter_activity|#has_transmembrane_transporter_activity|#has_transporter_activity|#involved_in_transmembrane_transport|#involved_in_transport|#located_in_plasma_membrane	cd06174-MFS|cl21472-MFS	--	--
Ca_17064	Ca_17064.1|Ca_LG_6:21703975-21704663|plus|	-1.82356	0.049782	no	NA	NA	NA	21703975	21704663	+	Glutaredoxin family protein	PTHR10168 PTHR10168	IPR002109 IPR011905 IPR012336	PF00462	GO:0009055 GO:0015035 GO:0045454	PS51354	SSF52833	Glutaredoxin-C9	XM_004505477.1	#has_electron_carrier_activity|#has_protein_disulfide_oxidoreductase_activity|#involved_in_cell_redox_homeostasis|#located_in_cytoplasm	cd03419-GRX_GRXh_1_2_like|cl00388-Thioredoxin_like	--	--
Ca_09596	Ca_09596.1|Ca_LG_4:19905180-19910459|minus|	3.66157	0.0505603	no	NA	NA	NA	19905180	19910459	-	spermidine synthase 1	PTHR11558 PTHR11558	IPR001045	PF01564	GO:0003824	PS51006	SSF53335	Thermospermine_synthase_ACAULIS5	XM_004498797.1	#has_catalytic_activity|#located_in_nucleus	cd02440-AdoMet_MTases|cl17173-AdoMet_MTases	--	--
Ca_02491	Ca_02491.1|Ca_LG_1:36288540-36294925|minus|	1.52667	0.0505776	no	NA	NA	NA	36288540	36294925	-	auxin response factor 6	PTHR31384	IPR003311 IPR003340 IPR010525 IPR011525 IPR015300	PF02309 PF02362 PF06507	GO:0003677 GO:0005634 GO:0006355 GO:0009725 GO:0046983	PS50863 PS50962	SSF10193 SSF54277	Auxin_response_factor_8	XM_004485922.1	#has_DNA_binding|#has_protein_dimerization_activity|#involved_in_regulation_of_transcription,_DNA-dependent|#involved_in_response_to_hormone_stimulus|#located_in_nucleus	cd10017-B3_DNA|cl03528-AUX_IAA|cl05824-Auxin_resp|cl15242-BfiI_C_EcoRII_N_B3	ARF	--
Ca_18006	Ca_18006.1|Ca_LG_6:38195973-38197649|minus|	-1.79497	0.0505776	no	NA	NA	NA	38195973	38197649	-	CAAX amino terminal protease family protein		IPR003675	PF02517	GO:0016020			--	XM_004514390.1	#located_in_membrane	cl00558-Abi	--	--
Ca_22460	Ca_22460.1|Ca_LG_8:3967348-3969221|plus|	-1.9855	0.0506868	no	NA	NA	NA	3967348	3969221	+	homeobox-leucine zipper protein 3	PTHR24326 PTHR24326	IPR000047 IPR001356 IPR003106 IPR006712 IPR009057 IPR017970	PF00046 PF02183 PF04618	GO:0000976 GO:0003677 GO:0003700 GO:0005634 GO:0006355 GO:0043565	PS00027 PS50071	SSF46689	Homeobox-leucine_zipper_protein_HAT4	XM_004511655.1	#has_DNA_binding|#has_sequence-specific_DNA_binding|#has_sequence-specific_DNA_binding_transcription_factor_activity|#has_transcription_regulatory_region_sequence-specific_DNA_binding|#involved_in_regulation_of_transcription,_DNA-dependent|#involved_in_transcription,_DNA-dependent|#located_in_nucleus	cd00086-homeodomain|cl00084-homeodomain|cl04627-HD-ZIP_N|cl22599-HALZ|smart00340-HALZ	HD-ZIP	--
Ca_03432	Ca_03432.1|Ca_LG_2:6607029-6611357|plus|	-1.32577	0.0512375	no	NA	NA	NA	6607029	6611357	+	exostosin-2-like [Glycine max]	PTHR11062 PTHR11062	IPR004263 IPR015338	PF09258	GO:0016758 GO:0031227		SSF53448	Exostosin-2	XM_004490906.1	#has_transferase_activity,_transferring_hexosyl_groups|#located_in_intrinsic_to_endoplasmic_reticulum_membrane|#located_in_mitochondrion	cl20374-Glyco_transf_64	--	--
Ca_06631	Ca_06631.1|Ca_LG_3:28236430-28238529|plus|	-1.83238	0.0512375	no	NA	NA	NA	28236430	28238529	+	exocyst subunit exo70 family protein C2	PTHR12542 PTHR12542	IPR004140 IPR016159	PF03081	GO:0000145 GO:0006887		SSF74788	Exocyst_complex_component_EXO70B1	XM_004492101.1	#involved_in_exocytosis|#located_in_exocyst|#located_in_nucleus	cl03878-Exo70	--	--
Ca_17604	Ca_17604.1|Ca_LG_6:29387755-29389860|plus|	2.23758	0.0512375	no	NA	NA	NA	29387755	29389860	+	heat shock protein 91	PTHR19375 PTHR19375	IPR007110 IPR013126	PF00012	GO:0005515	PS50835	SSF10092 SSF53067	Heat_shock_70_kDa_protein_14	XM_004506799.1	#has_ATP_binding|#involved_in_response_to_cadmium_ion|#located_in_cytosol|#located_in_nucleus|#located_in_plasma_membrane	cd10228-HSPA4_like_NDB|cl17037-NBD_sugar-kinase_HSP70_actin	--	--
Ca_06429	Ca_06429.1|Ca_LG_3:25804357-25805890|minus|	3.29798	0.0514516	no	NA	NA	NA	25804357	25805890	-	FASCICLIN-like arabinogalactan protein 8	PTHR32382 PTHR32382	IPR000782	PF02469		PS50213	SSF82153	Fasciclin-like_arabinogalactan_protein_10	XM_004492593.1	#located_in_anchored_to_plasma_membrane|#located_in_plasma_membrane	cl02663-Fasciclin	--	--
Ca_22714	Ca_22714.1|Ca_LG_8:6415415-6419726|plus|	3.25082	0.0514516	no	NA	NA	NA	6415415	6419726	+	ATP binding/protein serine/threonine kinase [Glycine max]	PTHR24420 PTHR24420	IPR000719 IPR001611 IPR002290 IPR003591 IPR008271 IPR011009 IPR013210	PF00069 PF00560 PF08263 PF13516 PF13855		PS00108 PS50011	SSF52047 SSF52058 SSF56112	Leucine-rich_repeat_receptor-like_kinase_protein_FLORAL_ORGAN_NUMBER1	XM_004511739.1	#has_ATP_binding|#has_protein_kinase_activity|#has_protein_serine/threonine_kinase_activity|#has_transferase_activity,_transferring_phosphorus-containing_groups|#involved_in_protein_phosphorylation|#located_in_plasma_membrane	PLN00113-PLN00113|cl08472-LRRNT_2|cl21453-PKc_like|cl22710-LRR_RI	--	--
Ca_04584	Ca_04584.1|Ca_LG_2:26988225-27004635|plus|	1.98446	0.051591	no	NA	NA	NA	26988225	27004635	+	regulation of nuclear pre-mRNA domain-containing protein 1A-like isoform X3 [Glycine max]	PTHR12460 PTHR12460	IPR006569 IPR006903 IPR008942	PF04818		PS51391	SSF48464	Regulation_of_nuclear_pre-mRNA_domain-containing_protein_1B	XM_004489585.1	#located_in_nucleus	cd03562-CID|cl02544-VHS_ENTH_ANTH	--	--
Ca_23325	Ca_23325.1|Ca_LG_8:14237013-14240033|minus|	-4.88863	0.0520219	no	NA	NA	NA	14237013	14240033	-	FAD/NAD(P)-binding oxidoreductase family protein	PTHR13789 PTHR13789	IPR002938 IPR003042	PF01494	GO:0008152 GO:0016491		SSF51905	FAD-dependent_urate_hydroxylase	XM_004511670.1	#has_oxidoreductase_activity|#involved_in_metabolic_process|#located_in_chloroplast	COG0654-UbiH|cl21454-SDR	--	--
Ca_00580	Ca_00580.1|Ca_LG_1:6270833-6274079|plus|	1.41514	0.0525288	no	NA	NA	NA	6270833	6274079	+	general regulatory factor 9	PTHR18860	IPR000308 IPR023409 IPR023410	PF00244	GO:0019904	PS00796 PS00797	SSF48445	14-3-3-like_protein_D	XM_004487103.1	#has_protein_domain_specific_binding|#located_in_cytoplasm|#located_in_plasma_membrane	cl02098-14-3-3	--	--
Ca_02144	Ca_02144.1|Ca_LG_1:32724290-32730938|plus|	1.54848	0.0527175	no	NA	NA	NA	32724290	32730938	+	sorting and assembly machinery component 50 homolog [Glycine max]	PTHR12815	IPR000184 IPR010827	PF01103 PF07244	GO:0019867			Sorting_and_assembly_machinery_component_50_homolog	XM_004500451.1	#located_in_nucleus	cl18362-Bac_surface_Ag|cl21628-Surf_Ag_VNR	--	--
Ca_02566	Ca_02566.1|Ca_LG_1:36970536-36972952|plus|	-1.75618	0.0527418	no	NA	NA	NA	36970536	36972952	+	c("riboflavin biosynthesis protein"	PTHR21327 PTHR21327	IPR000422 IPR000926 IPR016299 IPR017945	PF00925 PF00926	GO:0003935 GO:0008686 GO:0009231		SSF14269 SSF55821	Monofunctional_riboflavin_biosynthesis_protein_RIBA_3,_chloroplastic	XM_004485542.1	#has_3,4-dihydroxy-2-butanone-4-phosphate_synthase_activity|#has_GTP_cyclohydrolase_II_activity|#involved_in_riboflavin_biosynthetic_process|#located_in_chloroplast	PLN02831-PLN02831|cd00641-GTP_cyclohydro2|cl00336-DHBP_synthase|cl00522-GTP_cyclohydro2	--	--
Ca_04641	Ca_04641.1|Ca_LG_2:27675134-27680579|plus|	-6.09004	0.0527418	no	NA	NA	NA	27675134	27680579	+	lysosomal beta glucosidase-like isoform X2 [Glycine max]	PTHR30620 PTHR30620	IPR001764 IPR002772 IPR017853 IPR026892	PF00933 PF01915	GO:0004553 GO:0005975		SSF51445 SSF52279	Lysosomal_beta_glucosidase	XM_004489631.1	#has_hydrolase_activity,_hydrolyzing_O-glycosyl_compounds|#involved_in_carbohydrate_metabolic_process|#located_in_extracellular_region	cl07971-Glyco_hydro_3|cl22287-Glyco_hydro_3_C	--	--
Ca_19547	Ca_19547.1|Ca_LG_7:8041714-8042247|minus|	2.05078	0.0527418	no	NA	NA	NA	8041714	8042247	-	Dynein light chain type 1 family protein	PTHR11886	IPR001372	PF01221	GO:0005875 GO:0007017		SSF54648	Dynein_light_chain_2,_cytoplasmic	XM_004508144.1	#involved_in_microtubule-based_process|#located_in_cytoplasm|#located_in_microtubule_associated_complex	cl03131-Dynein_light	--	--
Ca_22555	Ca_22555.1|Ca_LG_8:4949754-4951803|plus|	-1.93583	0.0527418	no	NA	NA	NA	4949754	4951803	+	Remorin family protein	PTHR31775 PTHR31775	IPR005516	PF03763				Remorin	XM_004511531.1	#located_in_nucleus	--	--	--
Ca_07938	Ca_07938.1|Ca_LG_3:41364120-41369836|minus|	-2.31499	0.0528114	no	NA	NA	NA	41364120	41369836	-	probable carboxylesterase 15-like [Glycine max]	PTHR23024 PTHR23024	IPR013094	PF07859	GO:0008152 GO:0016787		SSF53474	Probable_carboxylesterase_15	XM_004494232.1	#has_hydrolase_activity|#involved_in_metabolic_process|#located_in_nucleus	cl21494-Esterase_lipase	--	--
Ca_12025	Ca_12025.1|Ca_LG_5:2311794-2315263|minus|	2.98454	0.0528404	no	NA	NA	NA	2311794	2315263	-	ATP-binding ABC transporter	PTHR19211 PTHR19211	IPR003439 IPR003593 IPR017871 IPR027417	PF00005 PF12848	GO:0000166 GO:0005524 GO:0016887 GO:0017111	PS00211 PS50893	SSF52540	ABC_transporter_ATP-binding_protein_ARB1	XM_004487014.1	#has_ATP_binding|#has_ATPase_activity|#has_nucleoside-triphosphatase_activity|#has_nucleotide_binding|#located_in_plasma_membrane	COG0488-Uup|cd03221-ABCF_EF-3|cl14896-ABC_tran_2|cl21455-ABC_ATPase	--	--
Ca_04611	Ca_04611.1|Ca_LG_2:27384428-27398589|plus|	1.84689	0.0530289	no	NA	NA	NA	27384428	27398589	+	double-stranded-RNA-binding protein 4	PTHR10910 PTHR10910	IPR014720	PF00035		PS50137	SSF54768	Double-stranded_RNA-binding_protein_4	XM_004489624.1	#has_RNA_binding|#has_double-stranded_RNA_binding|#located_in_cytoplasm|#located_in_intracellular	cd00048-DSRM|cl00054-DSRM	--	--
Ca_23403	Ca_23403.1|Ca_LG_8:14994109-14997201|minus|	3.37948	0.0530289	no	NA	NA	NA	14994109	14997201	-	uncharacterized protein LOC100820285 isoform X2 [Glycine max]	PTHR31721 PTHR31721	IPR005134	PF03350				--	XM_004512279.1	#located_in_chloroplast_envelope|#located_in_plasma_membrane	cl01078-UPF0114	--	--
Ca_11239	Ca_11239.1|Ca_LG_4:42311467-42315370|minus|	1.65622	0.053089	no	NA	NA	NA	42311467	42315370	-	Protein of unknown function (DUF288)	PTHR31362 PTHR31362	IPR005049	PF03385				--	XM_004513799.1	#located_in_Golgi_apparatus|#located_in_chloroplast	cl15553-DUF288	--	--
Ca_09258	Ca_09258.1|Ca_LG_4:15453897-15457213|minus|	1.58715	0.0530907	no	NA	NA	NA	15453897	15457213	-	ATP binding microtubule motor family protein	PTHR24115 PTHR24115	IPR001752 IPR027417 IPR027640	PF00225	GO:0003777 GO:0005524 GO:0005871 GO:0007018 GO:0008017	PS50067	SSF52540	Kinesin-like_protein_KIFC3	XM_004495715.1	#has_ATP_binding|#has_microtubule_motor_activity|#involved_in_microtubule-based_movement	COG5059-KIP1|cl00286-Motor_domain	--	--
Ca_17360	Ca_17360.1|Ca_LG_6:25282135-25286853|minus|	2.23869	0.0532113	no	NA	NA	NA	25282135	25286853	-	receptor-like kinase 1	PTHR24420 PTHR24420	IPR000719 IPR001611 IPR011009	PF00069 PF00560	GO:0004672 GO:0005515 GO:0005524 GO:0006468 GO:0016772	PS50011	SSF52058 SSF56112	Inactive_leucine-rich_repeat_receptor-like_serine/threonine-protein_kinase_At1g60630	XM_004505709.1	#has_ATP_binding|#has_protein_kinase_activity|#has_transferase_activity,_transferring_phosphorus-containing_groups|#involved_in_protein_phosphorylation	cl19302-LRR_4|cl21453-PKc_like	--	--
Ca_21088	Ca_21088.1|Ca_LG_7:34079480-34080173|plus|	-4.7702	0.0532962	no	NA	NA	NA	34079480	34080173	+	Octicosapeptide/Phox/Bem1p family protein	PTHR31066 PTHR31066	IPR000270	PF00564	GO:0005515		SSF54277	--	XM_004515812.1	#located_in_nucleus	cd06410-PB1_UP2|cl02720-PB1	--	--
Ca_18042	Ca_18042.1|Ca_LG_6:38722447-38725044|minus|	-1.46193	0.0534817	no	NA	NA	NA	38722447	38725044	-	tubulin beta chain 2	PTHR11588	IPR000217 IPR002453 IPR003008 IPR008280 IPR017975 IPR018316 IPR023123	PF00091 PF03953	GO:0003924 GO:0005200 GO:0005525 GO:0005874	PS00227	SSF52490 SSF55307	Tubulin_beta_chain_(Fragment)	XM_004506663.1	#has_GTP_binding|#has_GTPase_activity|#has_structural_molecule_activity|#involved_in_GTP_catabolic_process|#involved_in_microtubule-based_movement|#involved_in_microtubule-based_process|#involved_in_protein_polymerization|#located_in_cell_wall|#located_in_chloroplast|#located_in_chloroplast_stroma|#located_in_cytoplasm|#located_in_membrane|#located_in_microtubule|#located_in_plasma_membrane|#loca…	PLN00220-PLN00220|cd02187-beta_tubulin|cl10017-Tubulin_FtsZ	--	--
Ca_14606	Ca_14606.1|Ca_LG_5:39545205-39546003|minus|	-2.17255	0.0537554	no	NA	NA	NA	39545205	39546003	-	titin-like [Glycine max]							--	XM_004501069.1	#located_in_chloroplast	--	--	--
Ca_14887	Ca_14887.1|Ca_LG_5:42456145-42457507|plus|	-1.96923	0.0540581	no	NA	NA	NA	42456145	42457507	+	HXXXD-type acyl-transferase family protein	PTHR31896 PTHR31896	IPR003480 IPR023213	PF02458	GO:0016747			Uncharacterized_acetyltransferase_At3g50280	XM_004501501.1	#has_transferase_activity,_transferring_acyl_groups_other_than_amino-acyl_groups|#located_in_cytoplasm|#located_in_cytosol	cl19241-Condensation	--	--
Ca_02253	Ca_02253.1|Ca_LG_1:33948595-33949602|minus|	-3.05565	0.0542376	no	NA	NA	NA	33948595	33949602	-	Cytochrome b6 n=2 Tax=Medicago truncatula RepID=G7ILP6_MEDTR							--	XM_004486137.1	#located_in_mitochondrion	--	--	--
Ca_08648	Ca_08648.1|Ca_LG_4:7980890-7983499|plus|	2.54992	0.0543037	no	NA	NA	NA	7980890	7983499	+	3-ketoacyl-CoA synthase 11	PTHR31561	IPR012392 IPR013601 IPR013747 IPR016038 IPR016039	PF08392 PF08541	GO:0003824 GO:0006633 GO:0008152 GO:0008610 GO:0016020 GO:0016747		SSF53901	3-ketoacyl-CoA_synthase_13	XM_004495346.1	#has_catalytic_activity|#has_transferase_activity,_transferring_acyl_groups_other_than_amino-acyl_groups|#involved_in_fatty_acid_biosynthetic_process|#involved_in_lipid_biosynthetic_process|#involved_in_metabolic_process|#located_in_extracellular_region|#located_in_membrane	PLN02192-PLN02192|cd00831-CHS_like|cl09938-cond_enzymes	--	--
Ca_14816	Ca_14816.1|Ca_LG_5:41751216-41752004|plus|	-4.35746	0.0543037	no	NA	NA	NA	41751216	41752004	+	inducer of CBF expression 4 [Glycine max]		IPR011598		GO:0046983		SSF47459	Transcription_factor_ICE1	XM_004501421.1	#located_in_nucleus	cd00083-HLH|cl00081-HLH	bHLH	--
Ca_26412	Ca_26412.1|scaffold04980:21492-25307|minus|	-1.31059	0.0543037	no	NA	NA	NA	21492	25307	-	regulatory protein NPR1	PTHR24413 PTHR24413	IPR000210 IPR002110 IPR011333 IPR013069 IPR020683 IPR021094	PF00651 PF12313 PF12796	GO:0005515 GO:0009863 GO:0009611 GO:0050832	PS50097 PS50297	SSF48403 SSF54695	Regulatory_protein_NPR4	XM_004497653.1	#located_in_nucleus	cd00204-ANK|cl02518-BTB|cl02529-ANK|cl13357-DUF3420|cl13712-NPR1_like_C	--	--
Ca_03939	Ca_03939.1|Ca_LG_2:14126973-14128711|plus|	-2.17468	0.054371	no	NA	NA	NA	14126973	14128711	+	Pathogenesis-related thaumatin superfamily protein	PTHR31048 PTHR31048	IPR001938 IPR017949	PF00314		PS00316 PS51367	SSF49870	Pathogenesis-related_protein_5	XM_004490489.1	#located_in_extracellular_region	cd09218-TLP-PA|cl02511-GH64-TLP-SF	--	--
